# Supplementary material
Source: PubMed Central journal article supplement (PMC8139914)

# Natural history, trajectory, and management of mechanically ventilated COVID-19 patients in the United Kingdom

## Supplementary Appendix

**Brijesh V Patel\***, Shlomi Haar, Rhodri Handslip, Chaiyawan Auepanwiriyaikul, Teresa Mei-Ling Lee, Sunil Patel, J. Alex Harston, Feargus Hosking-Jervis, Donna Kelly, Barnaby Sanderson, Barbara Bogatta, Kate Tatham, Ingeborg Welters, Luigi Camporota, Anthony C Gordon, Matthieu Komorowski, David Antcliffe, and John R Prowle, Zudin Puthuchery & A. Aldo Faisal\*; on behalf of the United Kingdom COVID-ICU National Service Evaluation.

**\*Clinical Science contact** – Dr Brijesh V Patel MD PhD. Clinical Senior Lecturer & Consultant in Intensive Care Medicine. Division of Anaesthetics, Pain Medicine & Intensive Care, Department of Surgery & Cancer, Faculty of Medicine, Imperial College London; Department of Adult Intensive Care, The Royal Brompton and Harefield NHS Foundation Trust, Sydney Street, London SW3 6NP

email: [brijesh.patel@imperial.ac.uk](mailto:brijesh.patel@imperial.ac.uk)

**\*Data Science contact** – Professor A. Aldo Faisal PhD. Professor of AI & Neuroscience. Dept. Of Computing & Dept. Of Bioengineering and Behaviour Analytics Lab, Data Science Institute and UKRI Centre for Doctoral Training in AI for Healthcare, Imperial College London, SW7 2AZ London, UK, and MRC London Institute for Medical Sciences, London W12 0NN UK

email: [aldo.faisal@imperial.ac.uk](mailto:aldo.faisal@imperial.ac.uk)

## Table of Contents

|                                                                                                                                                                                   |    |
|-----------------------------------------------------------------------------------------------------------------------------------------------------------------------------------|----|
| UK COVID-ICU NATIONAL SERVICE EVALUATION CONSORTIUM MEMBERS .....                                                                                                                 | 4  |
| STROBE STATEMENT .....                                                                                                                                                            | 5  |
| DETAILED METHODS .....                                                                                                                                                            | 8  |
| SUPPLEMENTARY TABLE LEGENDS .....                                                                                                                                                 | 13 |
| TABLE S1 - INDIVIDUAL SITE CONTRIBUTIONS .....                                                                                                                                    | 13 |
| TABLE S2 – VARIABLES INCLUDED IN LOGISTIC REGRESSION MODELS (WITH PERCENTAGE MISSINGNESS)...                                                                                      | 15 |
| TABLE S3 - MISSING VALUES FOR EACH PARAMETER – BY SITE.....                                                                                                                       | 16 |
| TABLE S4 - MISSING VALUES FOR EACH PARAMETER – BY DAY .....                                                                                                                       | 17 |
| TABLE S5 - DISTRIBUTION OF CO-MORBIDITIES WITH A) SEVERITY ON ADMISSION AND B) ICU OUTCOME ..                                                                                     | 18 |
| TABLE S6 - COMPARISON BETWEEN COVID-ICU AND ICNARC.....                                                                                                                           | 19 |
| TABLE S7- CLINICAL AND PHYSIOLOGICAL CHARACTERISTICS, OUTCOMES AND INTERVENTIONS ACCORDING TO ICU OUTCOME. ....                                                                   | 20 |
| TABLE S8- ICU ADMISSION PROFILES PER QUARTILE OF PATIENTS ADMITTED.....                                                                                                           | 21 |
| TABLE S9- UNI- AND MULTI-VARIATE MODEL ANALYSIS OF FACTORS ASSOCIATED WITH ICU MORTALITY. ..                                                                                      | 22 |
| TABLE S10 - TIME SERIES MIXED MODEL ANOVA ACCORDING TO ICU OUTCOME.....                                                                                                           | 23 |
| TABLE S11 - PROGRESSION OF HYPOXAEMIA IN COVID-19 AS COMPARED TO PRE-COVID ARDS PUBLICATIONS.....                                                                                 | 24 |
| TABLE S12 - CLINICAL AND PHYSIOLOGICAL CHARACTERISTICS, OUTCOMES AND INTERVENTIONS ACCORDING TO RESOLUTION OF HYPOXAEMIA OVER FIRST WEEK OF INVASIVE MECHANICAL VENTILATION. .... | 25 |
| TABLE S13 - TIME SERIES MIXED MODEL ANOVA ACCORDING TO RESOLUTION OF HYPOXAEMIA OVER FIRST WEEK OF MECHANICAL VENTILATION.....                                                    | 26 |
| TABLE S14 - UNI- AND MULTI-VARIATE MODEL ANALYSIS OF FACTORS ASSOCIATED WITH PROGRESSION OF HYPOXAEMIA OVER THE FIRST WEEK OF INVASIVE MECHANICAL VENTILATION .....               | 27 |
| TABLE S15 - THE APPLICATION, MEDIAN START DATE AND DURATION OF THE FIRST EPISODE OF INTERVENTIONS.....                                                                            | 28 |
| TABLE S16 - CLINICAL AND PHYSIOLOGICAL CHARACTERISTICS, OUTCOMES AND INTERVENTIONS ACCORDING TO PRONE RESPONSIVENESS.....                                                         | 29 |
| TABLE S17 - TIME SERIES MIXED MODEL ANOVA ACCORDING TO PRONE RESPONSIVENESS. ....                                                                                                 | 30 |
| TABLE S18 - UNI- AND MULTI-VARIATE MODEL ANALYSIS OF PRE-PRONATION FACTORS ASSOCIATED PRONE RESPONSIVENESS.....                                                                   | 31 |
| TABLE S19 - UNI- AND MULTI-VARIATE MODEL ANALYSIS OF POST- PRONATION FACTORS ASSOCIATED PRONE RESPONSIVENESS.....                                                                 | 32 |
| TABLE S20 - TIME SERIES MIXED MODEL ANOVA ACCORDING TO ARDS ON ADMISSION .....                                                                                                    | 33 |
| SUPPLEMENTARY FIGURE LEGENDS .....                                                                                                                                                | 34 |
| FIGURE S1 – DEMOGRAPHICS, ADMISSION DATES DURING SURGE, AND OUTCOMES OF COHORT .....                                                                                              | 38 |
| FIGURE S2 – COMPARISONS BETWEEN ICU SURVIVORS AND NON-SURVIVORS.....                                                                                                              | 39 |
| FIGURE S3 – MACHINE LEARNING AND EXPLAINABILITY ARTIFICIAL INTELLIGENCE ANALYSIS OF PREDICTORS OF ICU MORTALITY .....                                                             | 40 |
| FIGURE S4 – COMPARISONS BETWEEN HYPOXAEMIA RESOLVERS AND NON-RESOLVERS. ....                                                                                                      | 41 |

|                                                                                               |           |
|-----------------------------------------------------------------------------------------------|-----------|
| <b>FIGURE S5 – APPLICATION OF ICU AND ARDS SPECIFIC INTERVENTIONS .....</b>                   | <b>42</b> |
| <b>FIGURE S6 – SITE VARIATIONS IN ICU AND ARDS SPECIFIC INTERVENTIONS .....</b>               | <b>43</b> |
| <b>FIGURE S7 – LUNG PROTECTIVE TIDAL VOLUME AND OPEN LUNG STRATEGIES .....</b>                | <b>44</b> |
| <b>FIGURE S8 – COMPARISONS BETWEEN HYPOXAEMIA RESOLVERS AND NON-RESOLVERS. ....</b>           | <b>45</b> |
| <b>FIGURE S8 CONTINUED – COMPARISONS BETWEEN HYPOXAEMIA RESOLVERS AND NON-RESOLVERS.....</b>  | <b>46</b> |
| <b>FIGURE S9 – OXYGENATION INDEX DEPENDENCY ON PAO<sub>2</sub>/FIO<sub>2</sub> RATIO.....</b> | <b>47</b> |
| <b>FIGURE S10 – COMPARISON BETWEEN PPCA-RECONSTRUCTED AND ORIGINAL CLINICAL DATA.....</b>     | <b>48</b> |

## UK COVID-ICU National Service Evaluation Consortium members

**Study Committee:** Brijesh V Patel, Shlomi Haar, Rhodri Handslip, David Antcliffe, Ingeborg Welters, Luigi Camporota, John Prowle, Zudin Puthuchear, and Aldo Faisal

**Writing Committee:** Brijesh V Patel, Shlomi Haar, David Antcliffe, Ingeborg Welters, Barnaby Sanderson, Luigi Camporota, John Prowle, Zudin Puthuchear, and Aldo Faisal

**Data Science Team:** Dr Brijesh Patel, Dr Rhodri Handslip, Feargus Hosking-Jervis, Chaiyawan Auepanwiriyaikul, Dr Matthieu Komorowski; Dr Shlomi Haar, Professor Aldo Faisal

**Site Contributions (\*Site leads):** **Aintree University Hospitals NHS Foundation Trust:** Emma Addie; Barbara Borgatta\*; Roz Chisholm; Alexandra Crocokft; Anna Gilfedder; Peter Harding; Gladys Madzamba; Namratha Mathai; Maya Patel; Amie Reddy; Leanne Smith; Ian Turner-Bone; Lilian Wajero; Raegan Wignall; Laura Wilding. **Northern health and social care Trust:** (Antrim Area hospital, Causeway hospital) Paul Johnston\*; Ciaran Mackle; Nicholas McNaughton; Scott Rafferty. **Guys & St Thomas' NHS Foundation Trust:** Gill Arbane; Luigi Camporota\*; Alison Dixon; Barnaby Sanderson\*. **Imperial College Healthcare NHS Trust:** David Antcliffe\*; Mariana Ferrari Barbosa; Carlos Gomez; Abdalla Kaware, Fady Tarek Khalil, Matthieu Komorowski\*, Maie Templeton, Raja Bilal Zafar. **University Hospitals of Leicester NHS Trust:** Mrs Michelle Craner; Mrs Sarah Edwards; Neil Flint; Dr Graziella Isgro; Hakeem Yusuff\*. **Liverpool University Hospitals NHS Foundation Trust:** Jaime Fernandez Roman; Oliver Hamilton; Brian Johnson; Emily Johnson; Maria Lopez Martinez; Suleman Mulla; David Shaw; Alicia Waite; Victoria Waugh; Ingeborg Welters\*; Karen Williams. **Newcastle upon Tyne Hospitals NHS Foundation Trust:** Benjamin Evans; Lewis Gray; Sam Horne; Natalie Jones; Donna Kelly\*; Rebecca Lawrance; Jennifer Partridge; Antonia Snell; Lucy Venyo; Thomas Walker. **Royal Brompton and Harefield NHS Foundation Trust:** Frank Barrett; Sebastian Cabero Alonso; Masoomah Farazdaghi; Ben Garfield; Clara Hernandez Caballero; Stephane Ledot; Teresa Lee; James Leslie; Helen McGuire; Lorraine O'Connor; Maurizio Passariello; Brijesh Patel\*; Sunil Patel; Alex Rosenberg; Jennifer Thomson; Dhulamini Wijeratne. **Royal Cornwall Hospitals NHS Trust:** Sarah Bean; Karen Burt; Rosanna Jury; Oliver Quick; Michael Spivey\*; Josh Thorns. **Barts Health NHS Trust:** Sana Ali; Thomas Beazer; Matilda Boa; Rosemarie Burd; Zoe Burdon; J Burgess; Natalie Cameron; A Daou; Charles Fadipe; FAJ Freer; Gayle Fung; Lindsey Iles; Aaron Jones; Agne Jovaisaite; Gabriella Knight; Veda Kudva; J Lampard; Ruby Lightfoot; Nicholas Low; Caroline Olabisi; Osama Omrani; Rebecca Pease; John Prowle\*; Zudin Puthuchear\*; Johnathan Mak; Aamir Saiyed; Maria Salamanca; Gauri Saxena; W Stanley; Nida Tahir; Yize Wan; Anton Weatherhead. **Royal Papworth Hospital NHS Foundation Trust:** Linzi Dunham; Melissa Earwaker\*; Amy Gladwell. **Royal Marsden Hospital NHS Foundation Trust:** Thomas Bemand; Ethel Black; Samantha Coulson; Arnold Dela Rosa; Shamen Jhanji; Ravishankar Rao Baikady; Kate Tatham; Zoszka Webb\*. **South Tyneside and Sunderland NHS Foundation Trust:** Sarah Cornell; Anthony Rostron\*; Fiona Wakinshaw; Lindsey Woods.



## STROBE statement

|                              | <b>Item<br/>No</b> | <b>Recommendation</b>                                                                                                                                                                | <b>Page<br/>No</b> |
|------------------------------|--------------------|--------------------------------------------------------------------------------------------------------------------------------------------------------------------------------------|--------------------|
| <b>Title and abstract</b>    | 1                  | (a) Indicate the study's design with a commonly used term in the title or the abstract                                                                                               | 1-5                |
|                              |                    | (b) Provide in the abstract an informative and balanced summary of what was done and what was found                                                                                  | 4-5                |
| <b>Introduction</b>          |                    |                                                                                                                                                                                      |                    |
| Background/rationale         | 2                  | Explain the scientific background and rationale for the investigation being reported                                                                                                 | 7                  |
| Objectives                   | 3                  | State specific objectives, including any prespecified hypotheses                                                                                                                     | 7                  |
| <b>Methods</b>               |                    |                                                                                                                                                                                      |                    |
| Study design                 | 4                  | Present key elements of study design early in the paper                                                                                                                              | 8-10               |
| Setting                      | 5                  | Describe the setting, locations, and relevant dates, including periods of recruitment, exposure, follow-up, and data collection                                                      | 8                  |
| Participants                 | 6                  | (a) Give the eligibility criteria, and the sources and methods of selection of participants. Describe methods of follow-up                                                           | 8                  |
|                              |                    | (b) For matched studies, give matching criteria and number of exposed and unexposed                                                                                                  | N/A                |
| Variables                    | 7                  | Clearly define all outcomes, exposures, predictors, potential confounders, and effect modifiers. Give diagnostic criteria, if applicable                                             | 8-10               |
| Data sources/<br>measurement | 8*                 | For each variable of interest, give sources of data and details of methods of assessment (measurement). Describe comparability of assessment methods if there is more than one group | 8-10               |
| Bias                         | 9                  | Describe any efforts to address potential sources of bias                                                                                                                            | 8-10               |
| Study size                   | 10                 | Explain how the study size was arrived at                                                                                                                                            | 8                  |

|                        |     |                                                                                                                                                                                                      |       |
|------------------------|-----|------------------------------------------------------------------------------------------------------------------------------------------------------------------------------------------------------|-------|
| Quantitative variables | 11  | Explain how quantitative variables were handled in the analyses. If applicable, describe which groupings were chosen and why                                                                         | 8-10  |
| Statistical methods    | 12  | (a) Describe all statistical methods, including those used to control for confounding                                                                                                                | 8-10  |
|                        |     | (b) Describe any methods used to examine subgroups and interactions                                                                                                                                  | 8-10  |
|                        |     | (c) Explain how missing data were addressed                                                                                                                                                          | 8     |
|                        |     | (d) If applicable, explain how loss to follow-up was addressed                                                                                                                                       | NA    |
|                        |     | (e) Describe any sensitivity analyses                                                                                                                                                                | 8-10  |
| <b>Results</b>         |     |                                                                                                                                                                                                      |       |
| Participants           | 13* | (a) Report numbers of individuals at each stage of study—e.g., numbers potentially eligible, examined for eligibility, confirmed eligible, included in the study, completing follow-up, and analysed | 11    |
|                        |     | (b) Give reasons for non-participation at each stage                                                                                                                                                 | 8-10  |
|                        |     | (c) Consider use of a flow diagram                                                                                                                                                                   | Fig1  |
| Descriptive data       | 14* | (a) Give characteristics of study participants (eg demographic, clinical, social) and information on exposures and potential confounders                                                             | 11    |
|                        |     | (b) Indicate number of participants with missing data for each variable of interest                                                                                                                  | N/A   |
|                        |     | (c) Summarise follow-up time (eg, average and total amount)                                                                                                                                          | 11-13 |
| Outcome data           | 15* | Report numbers of outcome events or summary measures over time                                                                                                                                       | 11-13 |

|                          |    |                                                                                                                                                                                                                                                                                                                                                                                                                       |                           |
|--------------------------|----|-----------------------------------------------------------------------------------------------------------------------------------------------------------------------------------------------------------------------------------------------------------------------------------------------------------------------------------------------------------------------------------------------------------------------|---------------------------|
| Main results             | 16 | (a) Give unadjusted estimates and, if applicable, confounder-adjusted estimates and their precision (eg, 95% confidence interval). Make clear which confounders were adjusted for and why they were included<br><br>(b) Report category boundaries when continuous variables were categorized<br><br>(c) If relevant, consider translating estimates of relative risk into absolute risk for a meaningful time period | 11-13<br><br>NA<br><br>NA |
| Other analyses           | 17 | Report other analyses done—e.g. analyses of subgroups and interactions, and sensitivity analyses                                                                                                                                                                                                                                                                                                                      | 11-13                     |
| <b>Discussion</b>        |    |                                                                                                                                                                                                                                                                                                                                                                                                                       |                           |
| Key results              | 18 | Summarise key results with reference to study objectives                                                                                                                                                                                                                                                                                                                                                              | 14-17                     |
| Limitations              | 19 | Discuss limitations of the study, taking into account sources of potential bias or imprecision. Discuss both direction and magnitude of any potential bias                                                                                                                                                                                                                                                            | 16                        |
| Interpretation           | 20 | Give a cautious overall interpretation of results considering objectives, limitations, multiplicity of analyses, results from similar studies, and other relevant evidence                                                                                                                                                                                                                                            | 14-17                     |
| Generalisability         | 21 | Discuss the generalisability (external validity) of the study results                                                                                                                                                                                                                                                                                                                                                 | 14-17                     |
| <b>Other information</b> |    |                                                                                                                                                                                                                                                                                                                                                                                                                       |                           |
| Funding                  | 22 | Give the source of funding and the role of the funders for the present study and, if applicable, for the original study on which the present article is based                                                                                                                                                                                                                                                         | 3                         |

\*Give information separately for exposed and unexposed groups.

**Note:** An Explanation and Elaboration article discusses each checklist item and gives methodological background and published examples of transparent reporting. The STROBE checklist is best used in conjunction with this article (freely available on the Web sites of PLoS Medicine at <http://www.plosmedicine.org/>, Annals of Internal Medicine at <http://www.annals.org/>, and Epidemiology at <http://www.epidem.com/>). Information on the STROBE Initiative is available at <http://www.strobe-statement.org>.

## Detailed Methods

**Study design.** We performed a multicentre, observational cohort study in patients with SARS-CoV-2 infection who required mechanical ventilation for severe Covid-19 infection in the United Kingdom.

**Exposure.** Adult patients (aged  $\geq 18$  years) with laboratory confirmed SARS-CoV-2 infection who required mechanical ventilation in the United Kingdom between March 1<sup>st</sup> and August 31<sup>st</sup> 2020.

**Ethical approval.** Each site registered the protocol as a service evaluation, as approved by the United Kingdom's Health Research Authority. All patients lacked capacity, and the need for individual informed consent was waived for collection of data during routine care, with no breach of privacy or anonymity. The "Strengthening the Reporting of Observational Studies in Epidemiology" statement guidelines were applied (see supplementary appendix pages 4-5) <sup>1</sup>.

**Data collection and procedures.** We set up a data processing pipeline where only routine, anonymised data was collected with no change to clinical care. Patients were identified through daily review of paper or electronic medical records using a standardised case record form (CRF), with retrospective and prospective data collection permitted. Data was extracted from either electronic healthcare records (EHRs) or paper-based records. Sites were given the option to submit their EHRs either in a predetermined format set by the Covid-ICU own secure REDCap database form fields or as a raw dump of data in CSV file format, that was then record-by-record manually screened for data consistency. Paper-based ICU operations sites were able to enter the data directly by the site representative into our REDCap Electronic Data Capture (REDCap v10.0.10; Vanderbilt University, US, local version hosted by Imperial College servers in the UK).

Each site's representative was given a unique username and password for data entering-only access to the database to connect via an encrypted online connection. Confidentiality was protected through a de-identified study number. A range of ICUs were included including secondary and tertiary care organisations (Table S1). In brief, the CRF captured admission demographics, twice daily (8am and 8pm) respiratory physiology and blood gas results, daily ARDS interventions, daily Covid interventions, daily blood results and outcome status. Patients were categorized within 48 hours of invasive mechanical ventilation (IMV) based on their PaO<sub>2</sub>/FIO<sub>2</sub> ratio into no ARDS, mild, moderate, and severe ARDS <sup>2</sup>.

**ECMO.** We excluded patients progressing to ECMO. This had a number of reasons: we could not collect timing of ECMO as these data are collected on an online referral system with limited access. Indeed, most patients in the UK were not eligible for ECMO during the pandemic as they did not fall within the acceptance criteria for the national service in the UK (Camporota, L. et al. Consensus on the referral and admission of patients with severe respiratory failure to the NHS ECMO service. *Lancet Respir Medicine* (2021) doi:10.1016/s2213-2600(20)30581-6). Hence, the exact number of patients placed onto ECMO from the participating ICUs does not provide an accurate reflection of ECMO provision given the commissioned provision of ECMO nationally by five "specialist" centres. We have obtained data from the national commissioners for the time period covered by the study to ensure data transparency. Overall, between March 1st to August 31st, there were 1596 referrals (20% of all ventilated patients) to the service with 306 patients (4% of all ventilated patients) accepted for ECMO in the United Kingdom (data from NHS England commissioned service).

We note, that our deep learning model suggested that PaO<sub>2</sub>/FiO<sub>2</sub>, ventilatory ratio and peak pressure to be increasingly predictive of outcome across the first week, in addition to other measures including platelet count, CRP and lactate. ECMO aspects would be worthy of a separate study.

**Resolution of hypoxaemia over first week of IMV.** Hypoxaemia was categorised as per Berlin definition of ARDS<sup>2</sup>. First week resolvers were defined by moving over the first week of mechanical ventilation to a less severe ARDS hypoxaemia category, and vice-versa for non-resolvers<sup>2,3</sup>. In addition to the patients who resolved, also those who remained mild or got discharged were considered "resolvers" while those who deteriorate, remained moderate or severe, or died, were considered "non-resolvers".

**Responsiveness to prone position.** We considered the longer-term effect on PaO<sub>2</sub>/FiO<sub>2</sub> after prone positioning and defined prone responsiveness as maintenance of a mean PaO<sub>2</sub>/FiO<sub>2</sub> >20kPa over 7 days after the first prone episode. Finally, we defined a proning window as a PaO<sub>2</sub>/FiO<sub>2</sub> <20kPa, with an FiO<sub>2</sub> ≥ 0.6, a PEEP ≥ 5cmH<sub>2</sub>O to assess opportunities to apply the intervention. Prone windows were measured at 8am and 8pm with the ventilator and arterial blood gas evaluation.

**Interventions periods.** The incidence and duration of interventions as well as ventilation setting were analysed and reported to current strategies e.g. low tidal volume ventilation and ARDSNet PEEP tables. We defined an intervention period as a daily application of the intervention with a day of no intervention defining the end of the current period and the onset of the next period.

**Logistic regression in statistical analysis (details).** We ran multivariate logistic regression models, using backward method for variable selection (with screening univariate,  $p < 0.1$ ) to each outcome variable to test associations with independent variables. The full list of variables tested for inclusion in these models is shown in Supplementary Table S2. This means that only variables with less than 40% missingness were included in each outcome model (missing value analysis in the relevant time points for each analysis is shown in Table S2). Variables that showed clinical overlap (e.g. SOFA renal and creatinine) had one variable excluded. A data driven approach to collinearity was not taken as many clinical variables were associated with each other due to relationships with severity of illness. A full correlation matrix for each analysis can be found in the Supplementary figures (see Figure SX). For all outcomes, only patients with more than 80% of the variables were included in the models. Accordingly, up to 20% of the data were missing and thus were imputed. Thus, Missing values and imputation were handled according to the following data curation protocol: 1. we removed variables with >40% missingness (deletion of a variable across all patient records); 2. we removed patients which showed >20% missingness on those variables (deletion of patient records if the individual records were too incomplete); 3. Imputing the missing data – which means <20% of the data is imputation. Data imputation was applied using k-nearest neighbours' algorithm. We ran the imputation with a k of 3, 5, and 7 both on the continuous variable and on the quartile categorization. The maximal odds ratio difference between the imputation approaches for each variable was 0.04 (IQR 0.03-0.07) and had no effect on the significance. All reported results are based on 5-nearest neighbours' imputation on the quartile categorization. Data were assumed to be missing at random (MAR) owing to the nature of different personnel at many different sites completing each data entry (the full missing value analysis, by site and by day, is shown in Tables S2, S3 and S4). To enable interpretable and comparable odds ratios, all continuous variables were transformed to categorical by splitting them into quartiles. Accordingly, the odds ratio is the risk increase per quartile increase in the measurement. For age, the odds ratio is the risk increase per decade increase; for SOFA scores, the odds ratio is the risk increase per unit increase in the SOFA score; and for binary variables (e.g., gender, comorbidities) the odds ratio is the risk increase of being positive (e.g. being male, having comorbidity).

**Statistical analysis of longitudinal measures (details).** The rmANOVA was applied separately to each physiology variable, and for each variable, only patients with more than 80% of the variable's measurements over that week were included in the model. Since this is a univariate analysis over time, here, the missing data points were imputed with a linear interpolation. Variables for which fewer than

30 patients had more than 80% of the measurements were not analysed. To minimise information censoring (due to death or improvement) and resultant bias in longitudinal analyses, only patients with continuous data for the first 7 days were included. To prevent the risk of too many false positive, we accounted for multiple comparisons in the interaction statistic by controlling the false discovery rate (FDR).

***Machine Learning models for of daily and weeklong- mortality prediction (details).*** Imputation for our machine learning models followed the following procedure: We performed advanced statistical inference using Expectation-Maximisation to infer the most likely missing data value based on the overall data correlation structures, performing all imputations simultaneously to maximise the joint probability of the imputed and measured data: Empirical analysis showed that our clinical parameters were either continuously distributed with normal or log-normal distributions or discretely distributed categorical data. We transformed the log-normal values into normal temporary variables. We performed Probabilistic Principal Component Analysis on the variables, without performing dimensionality reduction, so as to reconstruct any missing values in the data tables, encoded as Not a Number (NaN) values <sup>4</sup>. We used the Expectation-Maximisation to iteratively fill in all missing values so that they were most consistent given the data within the clinical parameters, as well as the correlation structure across clinical parameters. We then back-transformed all log-normal distributed values and verified by systematic inspection that the imputed values were self-consistent with the data [SEE Figure S10 in Supplemental].

The deep neural network used fully connected layers consisting of 32 and then 16 neurons, respectively, and an output layer with one neuron (directly encoding mortality). We utilised the rectified linear activation function (ReLU) nonlinearity between each layer. This model comes closest to a generalisation of logistic regression, chosen because of the fixed amount of data, so as to encapsulate a relatively compact, but yet more flexible function approximator than logistic regression. We tried also changes to the neural network architecture with a deeper, 5-layer design, and another architecture with a recurrent LSTM layer to operate on the time series but found that in both cases the more compact 3-layer model performed best. We think of the 3-layer model as a non-linear extension of logistic regression with more expressive power to model the data but a relatively small increase in model complexity.

We utilised 30 epochs for training and a 70-to-30 ratio was used to divide the data into training data (70%) and testing data (30%). Even though the mortality label's distribution in the data was not particularly imbalanced, we nevertheless utilised a Synthetic Minority Oversampling Technique (SMOTE) <sup>5</sup>. The testing data were also randomly sampled to have a balanced distribution of mortality

labels when evaluating and reporting performance. All models were implemented in the PyTorch framework and a single workstation with a GPU was used to train and test all models.

**Grouping of dynamic clinical parameter importance through Explainable AI (details).** Through interactive data visualisation we were able to identify that the importance of clinical parameters for mortality prediction changed day-by-day over the first week in both the logistic regression and the deep learning model. We grouped the importance of each clinical parameter into 4 categories of 1. increasing, 2. decreasing, 3. constant high and 4. constant low importance for predicting mortality outcome. We utilised a hard thresholding of absolute SHAP values to distinguish between group 1.+3. and 2.+4.: We deemed features with a mean of absolute SHAP value greater than 0.02 to be in the high or rising importance group and the rest to be of low or losing importance group. The threshold was derived from inspection of the empirical histogram of the absolute SHAP suggesting two modes. We then used linear regression coefficients of the SHAP values over the week (giving us a trendline) to distinguish between constant (3.+4.) and changing (1.+2.) variables. In the high or rising group, we considered SHAP curves with linear regression coefficients greater than 0.005 to have rising importance whilst the rest were of high importance. Similarly, in the low or losing collection, we considered SHAP curves with coefficients less than -0.002 to be losing significance whilst the rest were deemed to be of low importance. Again, the threshold was derived from inspection of the empirical histogram of the linear regression coefficients suggesting distinct modes.

## References.

- 1 Elm E von, Altman DG, Egger M, *et al.* The Strengthening the Reporting of Observational Studies in Epidemiology (STROBE) Statement: guidelines for reporting observational studies\*. *B World Health Organ* 2007; **85**: 867–72.
- 2 Acute Respiratory Distress Syndrome: The Berlin Definition. *Jama* 2012; **307**: 2526–33.
- 3 Bellani G, Laffey JG, Pham T, *et al.* Epidemiology, Patterns of Care, and Mortality for Patients With Acute Respiratory Distress Syndrome in Intensive Care Units in 50 Countries. *Jama* 2016; **315**: 788–800.
- 4 Tipping ME, Bishop CM. Probabilistic Principal Component Analysis. *J Royal Statistical Soc Ser B Statistical Methodol* 1999; **61**: 611–22.
- 5 Chawla NV, Bowyer KW, Hall LO, Kegelmeyer WP. SMOTE: Synthetic Minority Over-sampling Technique. *J Artif Intell Res* 2002; **16**: 321–57.



## Supplementary Table Legends

**Table S1.** Lists of participating sites.

**Table S2.** Full list of variables for inclusion in models with and percentage missingness per analysis.

**Table S3.** Percentage of missing values for each parameter in each site.

**Table S4.** Percentage of missing values for each parameter on each day.

**Table S5.** Distribution of comorbidities with a) severity on admission and b) ICU outcome

**Table S6.** Comparison between COVID-ICU and the UK Intensive Care National Audit and Research Centre (ICNARC).

**Table S7.** Clinical and physiological characteristics, outcomes and interventions according to ICU outcome.

**Table S8.** ICU admission profiles per quartile of patients admitted across the first surge.

**Table S9.** Uni- and multivariate model analysis of factors associated with ICU mortality.

**Table S10.** Time series mixed model ANOVA according to ICU outcome.

**Table S11.** Progression of hypoxaemia in COVID-19 as compared to pre-COVID ARDS publications. Tables show patient numbers and proportions changing between mild, moderate, and severe hypoxaemia categories from day 1 to day 7 of invasive mechanical ventilation. Table 2a – COVID-ICU database; 2b – LUNG-SAFE study <sup>19</sup>; 2c – Berlin definition study <sup>25</sup>.

**Table S12.** Clinical and physiological characteristics, outcomes, and interventions according to resolution of hypoxaemia over the first week of invasive mechanical ventilation.

**Table S13.** Time series mixed model ANOVA according to resolution of hypoxaemia over the first week of mechanical ventilation.

**Table S14.** Uni- and multivariate model analysis of factors associated with progression of hypoxaemia over the first week of invasive mechanical ventilation

**Table S15.** The application, median start date and duration of the first episode of interventions

**Table S16.** Clinical and physiological characteristics, outcomes and interventions according to prone responsiveness.

**Table S17.** Time series mixed model ANOVA according to prone responsiveness.

**Table S18.** Uni- and multivariate model analysis of pre-pronation factors associated with prone responsiveness.

**Table S19.** Uni- and multivariate model analysis of post-pronation factors associated with prone responsiveness.

**Table S20.** Time series mixed model ANOVA according to ARDS severity on admission.

Table S1 - Individual site contributions

| ICU site     | Number of patients | Proportion of total | Outcome (Mortality rate) | percentage transferred in |
|--------------|--------------------|---------------------|--------------------------|---------------------------|
| A            | 2                  | 0.3%                | 100.0%                   | 0.0%                      |
| B            | 1                  | 0.2%                | 0.0%                     | 100.0%                    |
| C            | 18                 | 2.8%                | 27.8%                    | 5.6%                      |
| D            | 35                 | 5.5%                | 31.4%                    | 82.9%                     |
| E            | 49                 | 7.7%                | 38.8%                    | 79.6%                     |
| F            | 19                 | 3.0%                | 26.3%                    | 15.8%                     |
| G            | 36                 | 5.7%                | 47.2%                    | 44.4%                     |
| H            | 57                 | 9.0%                | 59.6%                    | 7.0%                      |
| I            | 34                 | 5.4%                | 64.7%                    | 0.0%                      |
| J            | 34                 | 5.4%                | 29.4%                    | 76.5%                     |
| K            | 3                  | 0.5%                | 66.7%                    | 0.0%                      |
| L            | 64                 | 10.1%               | 51.6%                    | 4.7%                      |
| M            | 54                 | 8.5%                | 48.1%                    | 3.7%                      |
| N            | 5                  | 0.8%                | 80.0%                    | 40.0%                     |
| O            | 9                  | 1.4%                | 33.3%                    | 77.8%                     |
| P            | 31                 | 4.9%                | 35.5%                    | 16.1%                     |
| Q            | 9                  | 1.4%                | 88.9%                    | 0.0%                      |
| R            | 173                | 27.3%               | 32.4%                    | 12.1%                     |
|              |                    |                     |                          |                           |
| <b>Total</b> | <b>633</b>         |                     |                          |                           |

Table S2 – Variables included in logistic regression models (with percentage missingness)

| FieldLabel                    | % of Missingness |           |          |
|-------------------------------|------------------|-----------|----------|
|                               | Admission        | Before PP | After PP |
| Age                           | 0%               | 0%        | 0%       |
| Male                          | 0%               | 0%        | 0%       |
| BMI                           | 17%              | 11%       | 11%      |
| Height                        | 23%              | 16%       | 16%      |
| symptoms days                 | 36%              | 33%       | 33%      |
| Hypertension                  | 0%               | 0%        | 0%       |
| Diabetes mellitus             | 0%               | 0%        | 0%       |
| Oxygen saturation             | 18%              | 14%       | 10%      |
| pH                            | 0%               | 6%        | 0%       |
| PaCO <sub>2</sub>             | 0%               | 6%        | 0%       |
| HCO <sup>-</sup> <sub>3</sub> | 1%               | 6%        | 0%       |
| Lactate                       | 5%               | 10%       | 6%       |
| Peak pressure                 | 5%               | 13%       | 5%       |
| PEEP                          | 5%               | 14%       | 7%       |
| Minute ventilation            | 4%               | 14%       | 6%       |
| Dynamic Comp                  | 11%              | 21%       | 13%      |
| Oxygenation Index             | 39%              | 50%       | 46%      |
| Ventilatory Ratio             | 26%              | 27%       | 20%      |
| Cum fluid balance             | 7%               | 14%       | 19%      |
| Glucose                       | 8%               | 11%       | 17%      |
| BUN                           | 21%              | 31%       | 33%      |
| Sodium                        | 2%               | 4%        | 2%       |
| Potassium                     | 2%               | 4%        | 3%       |
| ALP                           | 5%               | 6%        | 9%       |
| ALT                           | 6%               | 9%        | 13%      |
| Creatinine Kinase             | 62%              | 56%       | 61%      |
| LDH                           | 69%              | 63%       | 67%      |
| Haemoglobin                   | 2%               | 4%        | 2%       |
| Haematocrit                   | 51%              | 37%       | 35%      |
| Neutrophils                   | 2%               | 4%        | 2%       |
| Monocytes                     | 3%               | 4%        | 3%       |
| Lymphocytes                   | 3%               | 4%        | 3%       |
| Basophils                     | 21%              | 14%       | 16%      |
| Eosinophils                   | 22%              | 15%       | 14%      |
| APTT                          | 37%              | 31%       | 37%      |
| PT                            | 37%              | 31%       | 36%      |
| Fibrinogen                    | 35%              | 33%       | 44%      |
| Ferritin                      | 54%              | 42%       | 51%      |
| D-dimer                       | 38%              | 40%       | 44%      |
| Triglycerides                 | 70%              | 69%       | 77%      |
| CRP                           | 6%               | 10%       | 11%      |
| Procalcitonin                 | 80%              | 77%       | 82%      |
| High sensitivity Troponin     | 60%              | 56%       | 64%      |
| NT Pro BNP                    | 91%              | 93%       | 94%      |
| SOFA Respiratory              | 1%               | 6%        | 0%       |
| SOFA Nervous                  | 20%              | 33%       | 27%      |
| SOFA Cardio                   | 9%               | 11%       | 9%       |
| SOFA Liver                    | 7%               | 15%       | 13%      |
| SOFA Coagulation              | 2%               | 4%        | 2%       |
| SOFA Kidneys                  | 1%               | 3%        | 0%       |
| SOFA score                    | 32%              | 49%       | 41%      |
| Prone initiation day          | -                | 0%        | 0%       |

Table S3 - Missing values for each parameter – by site

| Site                                | All | A    | B    | C    | D    | E    | F    | G    | H    | I   | J    | K    | L    | M    | N    | O    | P    | Q    | R    |
|-------------------------------------|-----|------|------|------|------|------|------|------|------|-----|------|------|------|------|------|------|------|------|------|
| N                                   | 633 | 2    | 1    | 18   | 35   | 49   | 19   | 36   | 57   | 34  | 34   | 3    | 64   | 54   | 5    | 9    | 31   | 9    | 173  |
| % of Missing Data                   |     |      |      |      |      |      |      |      |      |     |      |      |      |      |      |      |      |      |      |
| PaO <sub>2</sub> / FiO <sub>2</sub> | 6%  | 0%   | 2%   | 5%   | 3%   | 8%   | 7%   | 1%   | 10%  | 4%  | 22%  | 0%   | 1%   | 6%   | 0%   | 0%   | 5%   | 5%   | 5%   |
| Oxygen saturation                   | 21% | 7%   | 0%   | 7%   | 0%   | 1%   | 100% | 100% | 100% | 0%  | 2%   | 0%   | 1%   | 0%   | 0%   | 0%   | 0%   | 0%   | 0%   |
| pH                                  | 5%  | 0%   | 2%   | 4%   | 1%   | 2%   | 6%   | 1%   | 10%  | 4%  | 13%  | 0%   | 1%   | 6%   | 0%   | 0%   | 3%   | 6%   | 4%   |
| PaCO <sub>2</sub>                   | 5%  | 0%   | 2%   | 4%   | 1%   | 2%   | 6%   | 1%   | 10%  | 4%  | 13%  | 0%   | 1%   | 6%   | 0%   | 0%   | 3%   | 6%   | 4%   |
| Base excess                         | 6%  | 0%   | 2%   | 5%   | 2%   | 3%   | 17%  | 2%   | 12%  | 4%  | 14%  | 0%   | 2%   | 7%   | 0%   | 0%   | 3%   | 6%   | 4%   |
| HCO <sup>-</sup> <sub>3</sub>       | 5%  | 0%   | 2%   | 4%   | 2%   | 2%   | 13%  | 1%   | 10%  | 5%  | 13%  | 0%   | 1%   | 6%   | 0%   | 0%   | 3%   | 6%   | 5%   |
| Lactate                             | 9%  | 0%   | 100% | 4%   | 3%   | 2%   | 6%   | 1%   | 10%  | 5%  | 13%  | 0%   | 1%   | 7%   | 0%   | 0%   | 90%  | 6%   | 5%   |
| Peak pressure                       | 13% | 0%   | 4%   | 12%  | 14%  | 12%  | 7%   | 7%   | 4%   | 11% | 17%  | 8%   | 4%   | 6%   | 0%   | 1%   | 10%  | 3%   | 21%  |
| PEEP                                | 14% | 0%   | 2%   | 16%  | 20%  | 9%   | 0%   | 2%   | 0%   | 6%  | 18%  | 0%   | 2%   | 4%   | 0%   | 1%   | 4%   | 2%   | 30%  |
| Mean airway pressure                | 41% | 0%   | 25%  | 100% | 22%  | 14%  | 82%  | 28%  | 12%  | 96% | 20%  | 32%  | 100% | 97%  | 0%   | 22%  | 58%  | 100% | 32%  |
| Tidal Volume per Kg                 | 30% | 100% | 8%   | 51%  | 14%  | 28%  | 8%   | 22%  | 89%  | 6%  | 14%  | 0%   | 15%  | 37%  | 67%  | 97%  | 47%  | 86%  | 21%  |
| Respiratory rate                    | 12% | 0%   | 57%  | 11%  | 13%  | 34%  | 0%   | 0%   | 0%   | 0%  | 10%  | 0%   | 0%   | 0%   | 0%   | 0%   | 5%   | 0%   | 20%  |
| Minute ventilation                  | 15% | 0%   | 62%  | 34%  | 14%  | 37%  | 8%   | 6%   | 3%   | 2%  | 16%  | 0%   | 4%   | 4%   | 0%   | 1%   | 21%  | 2%   | 22%  |
| Dynamic Compliance                  | 19% | 0%   | 9%   | 37%  | 20%  | 14%  | 13%  | 9%   | 5%   | 16% | 20%  | 0%   | 6%   | 4%   | 3%   | 1%   | 26%  | 5%   | 31%  |
| Oxygenation Index                   | 43% | 0%   | 25%  | 100% | 22%  | 16%  | 82%  | 29%  | 20%  | 96% | 25%  | 32%  | 100% | 97%  | 0%   | 22%  | 59%  | 100% | 32%  |
| Ventilatory Ratio                   | 34% | 100% | 62%  | 54%  | 15%  | 48%  | 14%  | 23%  | 90%  | 9%  | 20%  | 0%   | 16%  | 39%  | 67%  | 97%  | 48%  | 86%  | 22%  |
| SOFA Score                          | 47% | 13%  | 96%  | 21%  | 22%  | 17%  | 65%  | 54%  | 68%  | 58% | 81%  | 84%  | 76%  | 55%  | 6%   | 47%  | 80%  | 59%  | 31%  |
| Non-Respiratory SOFA                | 44% | 13%  | 96%  | 18%  | 18%  | 8%   | 63%  | 52%  | 59%  | 56% | 78%  | 84%  | 76%  | 52%  | 6%   | 47%  | 79%  | 55%  | 29%  |
| Cumulative fluid balance            | 11% | 7%   | 100% | 5%   | 4%   | 7%   | 3%   | 4%   | 28%  | 0%  | 10%  | 4%   | 3%   | 2%   | 3%   | 1%   | 83%  | 0%   | 4%   |
| Glucose                             | 12% | 13%  | 100% | 10%  | 1%   | 3%   | 6%   | 1%   | 3%   | 8%  | 21%  | 12%  | 4%   | 61%  | 6%   | 4%   | 90%  | 2%   | 2%   |
| BUN                                 | 26% | 0%   | 100% | 19%  | 10%  | 100% | 8%   | 4%   | 5%   | 4%  | 100% | 8%   | 7%   | 3%   | 3%   | 10%  | 100% | 8%   | 11%  |
| Creatinine                          | 6%  | 0%   | 4%   | 6%   | 6%   | 3%   | 8%   | 4%   | 5%   | 4%  | 6%   | 8%   | 4%   | 3%   | 3%   | 6%   | 6%   | 8%   | 7%   |
| Sodium                              | 5%  | 0%   | 4%   | 7%   | 7%   | 1%   | 5%   | 1%   | 3%   | 4%  | 6%   | 8%   | 3%   | 3%   | 3%   | 3%   | 6%   | 8%   | 7%   |
| Potassium                           | 5%  | 0%   | 4%   | 6%   | 7%   | 4%   | 5%   | 1%   | 3%   | 4%  | 6%   | 8%   | 4%   | 3%   | 6%   | 3%   | 6%   | 9%   | 8%   |
| Bilirubin                           | 16% | 13%  | 11%  | 6%   | 14%  | 2%   | 19%  | 5%   | 21%  | 8%  | 6%   | 12%  | 3%   | 37%  | 6%   | 46%  | 60%  | 47%  | 14%  |
| Alkaline Phosphatase                | 11% | 0%   | 11%  | 10%  | 9%   | 2%   | 8%   | 4%   | 5%   | 11% | 6%   | 12%  | 2%   | 32%  | 6%   | 27%  | 61%  | 33%  | 8%   |
| AST                                 | 92% | 13%  | 100% | 97%  | 100% | 100% | 100% | 100% | 100% | 16% | 98%  | 76%  | 22%  | 100% | 78%  | 99%  | 97%  | 100% | 100% |
| ALT                                 | 13% | 13%  | 11%  | 6%   | 11%  | 2%   | 9%   | 9%   | 6%   | 7%  | 6%   | 12%  | 3%   | 38%  | 3%   | 46%  | 60%  | 68%  | 10%  |
| Creatinine Kinase                   | 71% | 100% | 98%  | 99%  | 100% | 8%   | 83%  | 40%  | 71%  | 14% | 26%  | 48%  | 8%   | 99%  | 33%  | 100% | 87%  | 91%  | 100% |
| LDH                                 | 80% | 47%  | 98%  | 95%  | 97%  | 11%  | 100% | 100% | 99%  | 17% | 50%  | 96%  | 51%  | 74%  | 8%   | 99%  | 88%  | 98%  | 95%  |
| Haemoglobin                         | 5%  | 0%   | 4%   | 2%   | 6%   | 1%   | 8%   | 4%   | 5%   | 3%  | 7%   | 8%   | 2%   | 4%   | 3%   | 4%   | 6%   | 20%  | 7%   |
| WBC                                 | 5%  | 0%   | 4%   | 2%   | 6%   | 1%   | 8%   | 4%   | 5%   | 3%  | 7%   | 8%   | 2%   | 4%   | 3%   | 5%   | 6%   | 20%  | 7%   |
| RBC                                 | 25% | 0%   | 4%   | 2%   | 6%   | 1%   | 100% | 100% | 100% | 6%  | 7%   | 8%   | 4%   | 5%   | 3%   | 5%   | 6%   | 20%  | 7%   |
| Platelet Count                      | 6%  | 0%   | 4%   | 2%   | 6%   | 1%   | 9%   | 4%   | 5%   | 5%  | 7%   | 8%   | 2%   | 4%   | 3%   | 6%   | 6%   | 20%  | 8%   |
| Haematocrit                         | 63% | 73%  | 4%   | 5%   | 100% | 1%   | 100% | 100% | 100% | 3%  | 7%   | 8%   | 2%   | 3%   | 3%   | 5%   | 6%   | 20%  | 100% |
| Neutrophils                         | 6%  | 0%   | 4%   | 3%   | 6%   | 1%   | 9%   | 6%   | 6%   | 3%  | 7%   | 8%   | 3%   | 5%   | 6%   | 6%   | 6%   | 20%  | 7%   |
| Monocytes                           | 6%  | 0%   | 4%   | 3%   | 7%   | 1%   | 9%   | 6%   | 6%   | 3%  | 7%   | 8%   | 4%   | 5%   | 6%   | 6%   | 6%   | 20%  | 7%   |
| Lymphocytes                         | 6%  | 0%   | 4%   | 3%   | 6%   | 1%   | 9%   | 6%   | 6%   | 4%  | 7%   | 8%   | 4%   | 5%   | 6%   | 6%   | 6%   | 20%  | 7%   |
| Basophils                           | 20% | 0%   | 4%   | 3%   | 33%  | 1%   | 9%   | 6%   | 6%   | 4%  | 7%   | 8%   | 4%   | 6%   | 6%   | 6%   | 6%   | 21%  | 44%  |
| Eosinophils                         | 16% | 0%   | 4%   | 3%   | 28%  | 1%   | 9%   | 6%   | 6%   | 4%  | 7%   | 8%   | 4%   | 6%   | 6%   | 6%   | 6%   | 20%  | 34%  |
| APTT                                | 50% | 27%  | 9%   | 3%   | 100% | 3%   | 10%  | 6%   | 6%   | 14% | 13%  | 8%   | 8%   | 53%  | 17%  | 42%  | 45%  | 74%  | 100% |
| PT                                  | 50% | 27%  | 9%   | 3%   | 100% | 3%   | 10%  | 6%   | 7%   | 14% | 12%  | 8%   | 7%   | 54%  | 8%   | 44%  | 45%  | 74%  | 100% |
| INR                                 | 75% | 100% | 100% | 2%   | 100% | 3%   | 98%  | 99%  | 96%  | 11% | 12%  | 8%   | 6%   | 100% | 8%   | 97%  | 100% | 100% | 100% |
| Fibrinogen                          | 50% | 27%  | 40%  | 16%  | 23%  | 10%  | 100% | 100% | 100% | 99% | 34%  | 52%  | 22%  | 55%  | 17%  | 70%  | 56%  | 76%  | 38%  |
| Ferritin                            | 63% | 47%  | 98%  | 75%  | 57%  | 18%  | 100% | 100% | 100% | 19% | 58%  | 68%  | 44%  | 72%  | 31%  | 32%  | 80%  | 100% | 56%  |
| D-dimer                             | 48% | 60%  | 100% | 72%  | 63%  | 17%  | 11%  | 11%  | 11%  | 21% | 58%  | 60%  | 49%  | 73%  | 6%   | 31%  | 93%  | 94%  | 63%  |
| Triglycerides                       | 77% | 93%  | 94%  | 96%  | 58%  | 99%  | 100% | 100% | 100% | 97% | 60%  | 56%  | 88%  | 81%  | 89%  | 54%  | 86%  | 95%  | 59%  |
| CRP                                 | 11% | 7%   | 4%   | 20%  | 6%   | 2%   | 7%   | 5%   | 5%   | 13% | 6%   | 16%  | 2%   | 74%  | 6%   | 4%   | 6%   | 94%  | 8%   |
| Procalcitonin                       | 80% | 87%  | 98%  | 79%  | 57%  | 93%  | 100% | 100% | 100% | 98% | 94%  | 64%  | 91%  | 99%  | 100% | 61%  | 91%  | 61%  | 59%  |
| High sensitivity Troponin           | 64% | 80%  | 100% | 79%  | 55%  | 7%   | 100% | 100% | 100% | 92% | 47%  | 52%  | 44%  | 73%  | 33%  | 43%  | 88%  | 98%  | 55%  |
| NT Pro BNP                          | 97% | 80%  | 100% | 78%  | 97%  | 100% | 100% | 100% | 100% | 97% | 89%  | 100% | 100% | 100% | 97%  | 98%  | 98%  | 97%  | 96%  |

Table S4 - Missing values for each parameter – by day

| Site                                | Day 0 | Day 1 | Day 2 | Day 3 | Day 4 | Day 5 | Day 6 | Day 7 | Day 8 | Day 9 | Day10 | Day11 | Day12 | Day13 | Day14 | Day15 | Day16 | Day17 | Day18 | Day19 | Day20 | Day21 |
|-------------------------------------|-------|-------|-------|-------|-------|-------|-------|-------|-------|-------|-------|-------|-------|-------|-------|-------|-------|-------|-------|-------|-------|-------|
| N                                   | 633   | 616   | 588   | 570   | 547   | 522   | 486   | 469   | 435   | 404   | 377   | 344   | 321   | 300   | 275   | 255   | 234   | 219   | 202   | 185   | 174   | 162   |
| % of Missing Data                   |       |       |       |       |       |       |       |       |       |       |       |       |       |       |       |       |       |       |       |       |       |       |
| PaO <sub>2</sub> / FIO <sub>2</sub> | 5%    | 2%    | 2%    | 3%    | 3%    | 2%    | 2%    | 3%    | 4%    | 3%    | 5%    | 3%    | 5%    | 5%    | 6%    | 6%    | 6%    | 6%    | 9%    | 6%    | 8%    | 8%    |
| Oxygen saturation                   | 19%   | 19%   | 18%   | 18%   | 18%   | 19%   | 19%   | 19%   | 18%   | 19%   | 20%   | 22%   | 21%   | 22%   | 21%   | 23%   | 22%   | 22%   | 22%   | 23%   | 24%   | 23%   |
| pH                                  | 2%    | 1%    | 2%    | 2%    | 3%    | 2%    | 2%    | 3%    | 3%    | 2%    | 3%    | 2%    | 3%    | 3%    | 3%    | 4%    | 4%    | 5%    | 5%    | 4%    | 6%    | 7%    |
| PaCO <sub>2</sub>                   | 2%    | 1%    | 2%    | 2%    | 3%    | 2%    | 2%    | 3%    | 3%    | 2%    | 3%    | 2%    | 3%    | 3%    | 3%    | 4%    | 4%    | 5%    | 5%    | 4%    | 6%    | 7%    |
| Base excess                         | 3%    | 1%    | 2%    | 3%    | 4%    | 3%    | 2%    | 4%    | 4%    | 3%    | 4%    | 3%    | 4%    | 5%    | 4%    | 5%    | 6%    | 6%    | 7%    | 5%    | 7%    | 9%    |
| HCO <sup>-</sup> <sub>3</sub>       | 3%    | 1%    | 2%    | 3%    | 3%    | 2%    | 2%    | 3%    | 3%    | 3%    | 4%    | 3%    | 3%    | 3%    | 3%    | 5%    | 6%    | 6%    | 7%    | 5%    | 7%    | 7%    |
| Lactate                             | 7%    | 5%    | 6%    | 7%    | 7%    | 6%    | 7%    | 8%    | 9%    | 7%    | 8%    | 8%    | 9%    | 9%    | 8%    | 9%    | 9%    | 9%    | 9%    | 8%    | 11%   | 10%   |
| Peak pressure                       | 12%   | 6%    | 4%    | 5%    | 6%    | 8%    | 6%    | 7%    | 8%    | 7%    | 7%    | 9%    | 12%   | 10%   | 9%    | 12%   | 14%   | 12%   | 13%   | 11%   | 15%   | 17%   |
| PEEP                                | 10%   | 6%    | 8%    | 9%    | 11%   | 12%   | 9%    | 11%   | 12%   | 12%   | 11%   | 11%   | 11%   | 13%   | 11%   | 11%   | 14%   | 13%   | 13%   | 14%   | 16%   | 18%   |
| Mean airway pressure                | 46%   | 39%   | 37%   | 37%   | 38%   | 39%   | 36%   | 37%   | 39%   | 37%   | 36%   | 35%   | 36%   | 35%   | 36%   | 38%   | 40%   | 39%   | 41%   | 41%   | 41%   | 41%   |
| Tidal Volume per Kg                 | 32%   | 25%   | 24%   | 25%   | 27%   | 27%   | 24%   | 26%   | 26%   | 26%   | 27%   | 28%   | 30%   | 29%   | 28%   | 29%   | 29%   | 28%   | 28%   | 26%   | 28%   | 30%   |
| Respiratory rate                    | 5%    | 1%    | 3%    | 4%    | 6%    | 8%    | 6%    | 6%    | 8%    | 7%    | 8%    | 10%   | 12%   | 10%   | 11%   | 13%   | 11%   | 12%   | 14%   | 14%   | 14%   | 17%   |
| Minute ventilation                  | 14%   | 5%    | 6%    | 8%    | 9%    | 11%   | 8%    | 9%    | 11%   | 10%   | 11%   | 12%   | 14%   | 14%   | 14%   | 16%   | 19%   | 17%   | 15%   | 16%   | 19%   | 20%   |
| Dynamic Compliance                  | 21%   | 13%   | 12%   | 13%   | 13%   | 16%   | 11%   | 15%   | 17%   | 16%   | 14%   | 15%   | 16%   | 16%   | 15%   | 16%   | 18%   | 17%   | 17%   | 17%   | 20%   | 20%   |
| Oxygenation Index                   | 48%   | 40%   | 38%   | 39%   | 40%   | 40%   | 37%   | 38%   | 40%   | 38%   | 38%   | 36%   | 36%   | 36%   | 38%   | 39%   | 41%   | 41%   | 44%   | 42%   | 44%   | 44%   |
| Ventilatory Ratio                   | 34%   | 26%   | 26%   | 28%   | 29%   | 30%   | 27%   | 28%   | 30%   | 29%   | 30%   | 31%   | 32%   | 31%   | 31%   | 33%   | 35%   | 32%   | 30%   | 30%   | 33%   | 38%   |
| SOFA Score                          | 75%   | 40%   | 39%   | 42%   | 41%   | 42%   | 41%   | 44%   | 43%   | 44%   | 41%   | 43%   | 42%   | 47%   | 42%   | 46%   | 45%   | 44%   | 46%   | 45%   | 49%   | 48%   |
| Non-Respiratory SOFA                | 71%   | 38%   | 36%   | 37%   | 38%   | 39%   | 38%   | 42%   | 41%   | 42%   | 38%   | 40%   | 40%   | 43%   | 38%   | 44%   | 43%   | 40%   | 42%   | 43%   | 44%   | 42%   |
| Cumulative fluid balance            | 47%   | 7%    | 7%    | 8%    | 7%    | 7%    | 7%    | 10%   | 9%    | 8%    | 9%    | 9%    | 9%    | 8%    | 8%    | 9%    | 8%    | 8%    | 9%    | 6%    | 7%    | 6%    |
| Glucose                             | 12%   | 12%   | 11%   | 12%   | 10%   | 10%   | 10%   | 11%   | 10%   | 11%   | 11%   | 12%   | 12%   | 11%   | 11%   | 10%   | 12%   | 11%   | 12%   | 10%   | 10%   | 6%    |
| BU <sub>N</sub>                     | 50%   | 22%   | 21%   | 21%   | 20%   | 21%   | 24%   | 23%   | 26%   | 24%   | 25%   | 26%   | 27%   | 27%   | 25%   | 27%   | 29%   | 26%   | 28%   | 28%   | 25%   | 25%   |
| Creatinine                          | 35%   | 3%    | 1%    | 2%    | 2%    | 2%    | 2%    | 2%    | 3%    | 2%    | 3%    | 4%    | 3%    | 3%    | 2%    | 5%    | 5%    | 3%    | 3%    | 2%    | 1%    | 4%    |
| Sodium                              | 34%   | 3%    | 1%    | 2%    | 1%    | 1%    | 1%    | 2%    | 2%    | 2%    | 3%    | 3%    | 3%    | 2%    | 4%    | 3%    | 3%    | 3%    | 3%    | 2%    | 1%    | 2%    |
| Potassium                           | 35%   | 3%    | 1%    | 2%    | 2%    | 1%    | 1%    | 2%    | 3%    | 2%    | 3%    | 3%    | 3%    | 2%    | 3%    | 4%    | 3%    | 4%    | 3%    | 2%    | 1%    | 2%    |
| Bilirubin                           | 38%   | 12%   | 13%   | 11%   | 11%   | 11%   | 13%   | 14%   | 12%   | 13%   | 12%   | 15%   | 13%   | 15%   | 12%   | 17%   | 16%   | 17%   | 15%   | 16%   | 14%   | 14%   |
| Alkaline Phosphatase                | 36%   | 10%   | 10%   | 8%    | 8%    | 7%    | 10%   | 9%    | 8%    | 8%    | 8%    | 10%   | 9%    | 10%   | 8%    | 9%    | 9%    | 8%    | 8%    | 8%    | 8%    | 7%    |
| AST                                 | 88%   | 87%   | 86%   | 85%   | 86%   | 87%   | 87%   | 89%   | 89%   | 89%   | 90%   | 95%   | 95%   | 96%   | 95%   | 95%   | 94%   | 97%   | 97%   | 97%   | 98%   | 99%   |
| ALT                                 | 38%   | 11%   | 11%   | 10%   | 9%    | 9%    | 11%   | 11%   | 10%   | 10%   | 10%   | 12%   | 11%   | 13%   | 10%   | 13%   | 12%   | 11%   | 10%   | 10%   | 10%   | 9%    |
| Creatinine Kinase                   | 70%   | 67%   | 67%   | 65%   | 67%   | 66%   | 67%   | 67%   | 66%   | 68%   | 67%   | 72%   | 71%   | 73%   | 71%   | 67%   | 72%   | 71%   | 76%   | 71%   | 73%   | 71%   |
| LDH                                 | 78%   | 77%   | 77%   | 76%   | 75%   | 73%   | 76%   | 77%   | 74%   | 76%   | 76%   | 79%   | 81%   | 79%   | 80%   | 79%   | 80%   | 82%   | 83%   | 83%   | 82%   | 80%   |
| Haemoglobin                         | 34%   | 3%    | 1%    | 2%    | 1%    | 2%    | 1%    | 1%    | 2%    | 2%    | 2%    | 4%    | 3%    | 3%    | 2%    | 4%    | 6%    | 4%    | 3%    | 3%    | 3%    | 3%    |
| WBC                                 | 34%   | 3%    | 1%    | 2%    | 1%    | 2%    | 1%    | 1%    | 2%    | 2%    | 2%    | 4%    | 3%    | 3%    | 2%    | 4%    | 6%    | 4%    | 3%    | 3%    | 3%    | 3%    |
| RBC                                 | 52%   | 22%   | 19%   | 20%   | 19%   | 20%   | 20%   | 20%   | 20%   | 21%   | 22%   | 25%   | 24%   | 24%   | 23%   | 25%   | 25%   | 25%   | 25%   | 25%   | 26%   | 25%   |
| Platelet Count                      | 34%   | 3%    | 2%    | 2%    | 2%    | 3%    | 1%    | 1%    | 2%    | 2%    | 2%    | 4%    | 4%    | 2%    | 3%    | 4%    | 6%    | 4%    | 3%    | 4%    | 3%    | 2%    |
| Haematocrit                         | 56%   | 53%   | 53%   | 54%   | 54%   | 55%   | 55%   | 56%   | 56%   | 58%   | 59%   | 63%   | 64%   | 63%   | 63%   | 63%   | 64%   | 65%   | 65%   | 66%   | 67%   | 69%   |
| Neutrophils                         | 34%   | 3%    | 2%    | 2%    | 1%    | 3%    | 2%    | 1%    | 2%    | 3%    | 3%    | 5%    | 4%    | 3%    | 3%    | 4%    | 6%    | 4%    | 5%    | 4%    | 3%    | 3%    |
| Monocytes                           | 35%   | 4%    | 2%    | 2%    | 2%    | 3%    | 2%    | 1%    | 2%    | 3%    | 3%    | 5%    | 4%    | 3%    | 3%    | 4%    | 6%    | 4%    | 5%    | 4%    | 3%    | 4%    |
| Lymphocytes                         | 35%   | 4%    | 2%    | 2%    | 1%    | 3%    | 2%    | 1%    | 2%    | 3%    | 3%    | 5%    | 4%    | 3%    | 3%    | 4%    | 6%    | 4%    | 5%    | 4%    | 3%    | 3%    |
| Basophils                           | 38%   | 24%   | 23%   | 25%   | 23%   | 23%   | 21%   | 21%   | 18%   | 22%   | 19%   | 20%   | 19%   | 16%   | 16%   | 15%   | 15%   | 13%   | 14%   | 11%   | 12%   | 14%   |
| Eosinophils                         | 38%   | 24%   | 18%   | 16%   | 12%   | 13%   | 13%   | 13%   | 17%   | 17%   | 16%   | 19%   | 18%   | 16%   | 13%   | 14%   | 14%   | 14%   | 11%   | 6%    | 8%    | 9%    |
| APTT                                | 42%   | 44%   | 47%   | 47%   | 46%   | 47%   | 44%   | 47%   | 46%   | 46%   | 47%   | 49%   | 49%   | 51%   | 49%   | 49%   | 50%   | 47%   | 50%   | 49%   | 49%   | 52%   |
| PT                                  | 42%   | 44%   | 47%   | 46%   | 45%   | 46%   | 44%   | 47%   | 46%   | 46%   | 47%   | 50%   | 49%   | 51%   | 48%   | 49%   | 52%   | 48%   | 51%   | 50%   | 49%   | 52%   |
| INR                                 | 70%   | 67%   | 69%   | 69%   | 68%   | 68%   | 69%   | 71%   | 70%   | 70%   | 72%   | 77%   | 77%   | 77%   | 74%   | 76%   | 76%   | 76%   | 78%   | 77%   | 78%   | 78%   |
| Fibrinogen                          | 65%   | 44%   | 48%   | 48%   | 46%   | 47%   | 48%   | 48%   | 47%   | 46%   | 47%   | 48%   | 45%   | 51%   | 46%   | 43%   | 44%   | 47%   | 49%   | 49%   | 52%   | 52%   |
| Ferritin                            | 75%   | 64%   | 62%   | 60%   | 56%   | 56%   | 56%   | 58%   | 58%   | 56%   | 59%   | 58%   | 63%   | 61%   | 57%   | 63%   | 63%   | 67%   | 67%   | 64%   | 65%   | 59%   |
| D-dimer                             | 61%   | 48%   | 52%   | 48%   | 46%   | 45%   | 48%   | 46%   | 49%   | 44%   | 46%   | 47%   | 43%   | 45%   | 42%   | 45%   | 45%   | 43%   | 44%   | 43%   | 46%   | 39%   |
| Triglycerides                       | 89%   | 78%   | 79%   | 77%   | 77%   | 78%   | 76%   | 78%   | 78%   | 76%   | 76%   | 73%   | 72%   | 79%   | 71%   | 77%   | 74%   | 74%   | 77%   | 74%   | 74%   | 73%   |
| CRP                                 | 39%   | 13%   | 11%   | 9%    | 10%   | 8%    | 9%    | 8%    | 8%    | 9%    | 7%    | 9%    | 8%    | 8%    | 7%    | 7%    | 9%    | 8%    | 8%    | 8%    | 5%    | 7%    |
| Procalcitonin                       | 95%   | 84%   | 85%   | 82%   | 82%   | 80%   | 80%   | 81%   | 81%   | 78%   | 80%   | 78%   | 79%   | 80%   | 75%   | 78%   | 74%   | 77%   | 77%   | 70%   | 77%   | 71%   |
| High sensitivity Troponin           | 78%   | 69%   | 72%   | 73%   | 69%   | 70%   | 73%   | 71%   | 70%   | 68%   | 65%   | 65%   | 66%   | 62%   | 61%   | 63%   | 61%   | 63%   | 61%   | 62%   | 54%   | 50%   |
| NT Pro BNP                          | 96%   | 94%   | 96%   | 97%   | 96%   | 96%   | 96%   | 97%   | 98%   | 97%   | 98%   | 97%   | 97%   | 97%   | 98%   | 95%   | 97%   | 97%   | 98%   | 97%   | 98%   | 98%   |

Table S5 - Distribution of co-morbidities with a) severity on admission and b) ICU outcome

| Co-morbidity according to severity   | ALL     |     |      | MILD    |    |       | MODERATE |     |      | SEVERE  |    |      | P value |
|--------------------------------------|---------|-----|------|---------|----|-------|----------|-----|------|---------|----|------|---------|
|                                      | Total N | n   | %    | Group N | n  | %     | Group N  | n   | %    | Group N | n  | %    |         |
| BMI>30 kg/m2                         | 524     | 209 | 39.9 | 123     | 44 | 35.77 | 278      | 107 | 38.5 | 123     | 58 | 47.2 | 0.626   |
| Myocardial infarction                | 573     | 17  | 3.0  | 129     | 6  | 4.65  | 292      | 7   | 2.4  | 152     | 4  | 2.6  | 0.485   |
| Congestive Heart Failure             | 573     | 11  | 1.9  | 128     | 2  | 1.56  | 293      | 6   | 2.0  | 152     | 3  | 2.0  | 0.922   |
| Peripheral vascular disease          | 574     | 9   | 1.6  | 129     | 1  | 0.78  | 293      | 6   | 2.0  | 152     | 2  | 1.3  | 0.577   |
| CVA or TIA                           | 574     | 17  | 3.0  | 129     | 4  | 3.10  | 293      | 9   | 3.1  | 152     | 4  | 2.6  | 0.966   |
| Dementia                             | 574     | 2   | 0.3  | 129     | 1  | 0.78  | 293      | 1   | 0.3  | 152     | 0  | 0.0  | 0.564   |
| Hypertension                         | 574     | 242 | 42.2 | 129     | 51 | 39.53 | 293      | 132 | 45.1 | 152     | 59 | 38.8 | 0.283   |
| Pregnancy                            | 366     | 1   | 0.3  | 71      | 0  | 0.00  | 183      | 1   | 0.5  | 112     | 0  | 0.0  | 0.613   |
| COPD                                 | 575     | 41  | 7.1  | 129     | 10 | 7.75  | 294      | 24  | 8.2  | 152     | 7  | 4.6  | 0.372   |
| Connective tissue disease            | 573     | 5   | 0.9  | 129     | 1  | 0.78  | 292      | 4   | 1.4  | 152     | 0  | 0.0  | 0.331   |
| Peptic ulcer disease                 | 573     | 8   | 1.4  | 129     | 1  | 0.78  | 293      | 5   | 1.7  | 151     | 2  | 1.3  | 0.728   |
| Diabetes mellitus                    | 574     | 176 | 30.7 | 129     | 46 | 35.66 | 293      | 93  | 31.7 | 152     | 37 | 24.3 | 0.161   |
| Diabetes mellitus - end organ damage | 569     | 18  | 3.2  | 127     | 5  | 3.94  | 291      | 10  | 3.4  | 151     | 3  | 2.0  | 0.637   |
| Hemiplegia                           | 365     | 2   | 0.5  | 70      | 1  | 1.43  | 183      | 1   | 0.5  | 112     | 0  | 0.0  | 0.564   |
| Moderate to severe CKD               | 366     | 20  | 5.5  | 71      | 4  | 5.63  | 183      | 13  | 7.1  | 112     | 3  | 2.7  | 0.380   |
| Solid tumour                         | 575     | 24  | 4.2  | 129     | 7  | 5.43  | 294      | 10  | 3.4  | 152     | 7  | 4.6  | 0.653   |
| Leukemia                             | 366     | 8   | 2.2  | 71      | 1  | 1.41  | 183      | 7   | 3.8  | 112     | 0  | 0.0  | 0.095   |
| Lymphoma                             | 365     | 5   | 1.4  | 71      | 1  | 1.41  | 182      | 4   | 2.2  | 112     | 0  | 0.0  | 0.331   |
| AIDS                                 | 574     | 5   | 0.9  | 129     | 3  | 2.33  | 293      | 2   | 0.7  | 152     | 0  | 0.0  | 0.113   |
| Steroid use                          | 365     | 14  | 3.8  | 71      | 3  | 4.23  | 182      | 10  | 5.5  | 112     | 1  | 0.9  | 0.198   |
| Other Immunosuppression use          | 366     | 16  | 4.4  | 71      | 4  | 5.63  | 183      | 11  | 6.0  | 112     | 1  | 0.9  | 0.166   |
| History of Deep Vein Thrombosis      | 363     | 7   | 1.9  | 70      | 4  | 5.71  | 181      | 2   | 1.1  | 112     | 1  | 0.9  | 0.102   |
| History of Pulmonary Embolus         | 364     | 5   | 1.4  | 71      | 1  | 1.41  | 181      | 3   | 1.7  | 112     | 1  | 0.9  | 0.911   |

| Co-morbidity according to outcome    | Survivors |     |       | Non-Survivors |     |       | P value |
|--------------------------------------|-----------|-----|-------|---------------|-----|-------|---------|
|                                      | Group N   | n   | %     | Group N       | n   | %     |         |
| BMI>30 kg/m2                         | 314       | 134 | 42.68 | 210           | 75  | 35.71 | 0.021   |
| Myocardial infarction                | 326       | 4   | 1.23  | 247           | 13  | 5.26  | 0.004   |
| Congestive Heart Failure             | 326       | 2   | 0.61  | 247           | 9   | 3.64  | 0.008   |
| Peripheral vascular disease          | 326       | 5   | 1.53  | 248           | 4   | 1.61  | 0.898   |
| CVA or TIA                           | 326       | 10  | 3.07  | 248           | 7   | 2.82  | 0.922   |
| Dementia                             | 326       | 1   | 0.31  | 248           | 1   | 0.40  | 0.826   |
| Hypertension                         | 326       | 129 | 39.57 | 248           | 113 | 45.56 | 0.081   |
| Pregnancy                            | 185       | 0   | 0.00  | 181           | 1   | 0.55  | 0.243   |
| COPD                                 | 327       | 19  | 5.81  | 248           | 22  | 8.87  | 0.129   |
| Connective tissue disease            | 326       | 1   | 0.31  | 247           | 4   | 1.62  | 0.087   |
| Peptic ulcer disease                 | 326       | 3   | 0.92  | 247           | 5   | 2.02  | 0.245   |
| Diabetes mellitus                    | 326       | 95  | 29.14 | 248           | 81  | 32.66 | 0.244   |
| Diabetes mellitus - end organ damage | 323       | 8   | 2.48  | 246           | 10  | 4.07  | 0.250   |
| Hemiplegia                           | 185       | 1   | 0.54  | 180           | 1   | 0.56  | 0.826   |
| Moderate to severe CKD               | 185       | 8   | 4.32  | 181           | 12  | 6.63  | 0.104   |
| Solid tumour                         | 326       | 12  | 3.68  | 249           | 12  | 4.82  | 0.439   |
| Leukemia                             | 185       | 2   | 1.08  | 181           | 6   | 3.31  | 0.060   |
| Lymphoma                             | 185       | 1   | 0.54  | 180           | 4   | 2.22  | 0.087   |
| AIDS                                 | 326       | 4   | 1.23  | 248           | 1   | 0.40  | 0.310   |
| Steroid use                          | 185       | 8   | 4.32  | 180           | 6   | 3.33  | 0.968   |
| Other Immunosuppression use          | 185       | 7   | 3.78  | 181           | 9   | 4.97  | 0.254   |
| History of Deep Vein Thrombosis      | 184       | 2   | 1.09  | 179           | 5   | 2.79  | 0.117   |
| History of Pulmonary Embolus         | 184       | 2   | 1.09  | 180           | 3   | 1.67  | 0.422   |

Table S6 - Comparison between Covid-ICU and ICNARC

|                                            | Covid-19 undergoing IMV |                  |
|--------------------------------------------|-------------------------|------------------|
|                                            | COVID-ICU               | ICNARC*          |
|                                            | N=633                   | N=7,702          |
| <b>Patient characteristics</b>             |                         |                  |
| Age (years), median (IQR)                  | 59.0 [51.0 66.0]        | 60 (51-67)       |
| Sex, n (%)                                 |                         |                  |
| Male                                       | 481 (76%)               | 5,544 (72.0%)    |
| Ethnicity, n (%)                           |                         |                  |
| White                                      | 250 (39.5%)             | 4,653 (60.4%)    |
| Asian                                      | 73 (11.5%)              | 1,256 (16.3%)    |
| Black                                      | 115 (18.2%)             | 804 (10.4%)      |
| Other                                      | 103 (16.3%)             | 693 (9.0%)       |
| Not stated                                 | 91 (14.4%)              | 296 (3.8%)       |
| BMI (kg/m <sup>2</sup> ), median (IQR)     | 28.1 [24.9 32.8]        | 28.3 (24.9-33.0) |
| BMI categories (kg/m <sup>2</sup> ), n (%) |                         |                  |
| >30                                        | 209 (39.9%)             | 39.9%            |
| <b>Acute illness severity<sup>4</sup></b>  |                         |                  |
| P/F Ratio (kPa), <sup>5</sup> median (IQR) | 18.3 [13.0 25.0]        | 15.0 (10.8-21.0) |
| P/F ratio categories (kPa) <sup>5</sup>    |                         |                  |
| ≤13.3kPa (≤100mmHg)                        | 166 (26.2%)             | 3,033 (40.4%)    |
| 13.3-26.7kPa (100-200mmHg)                 | 320 (50.6%)             | 3,530 (47.0%)    |
| >26.7kPa (>200mmHg)                        | 147 (23.2%)             | 952 (12.7%)      |
| <b>Organ support<sup>8,9</sup></b>         |                         |                  |
| <i>Renal support</i>                       |                         |                  |
| Receipt, n (%)                             | 211 (33.3%)             | 2,708 (35.2%)    |
| Duration (calendar days), median (IQR)     | 8.0 [4.0 14.0]          | 8 (4-15)         |
| <b>Outcome</b>                             |                         |                  |
| <i>Critical care</i>                       |                         |                  |
| Survived, n (%)                            | 365 (57.7%)             | 4,018 (52.2%)    |
| Died, n (%)                                | 268 (42.3%)             | 3,684 (47.8%)    |
| <b>Duration of stay (calendar days)</b>    |                         |                  |
| IMV, median (IQR)                          | 13.0 [7.0 22.0]         | 13 (7-23)        |
| Survived – median (IQR)                    | 15.0 [8.0 28.0]         | -                |
| Died – median (IQR)                        | 11.0 [6.0 16.0]         | -                |
| Critical care, median (IQR)                | 14.0 [8.0 23.0]         | 15.0 (8.0-27.0)  |
| Survived – median (IQR)                    | 17.0 [9.8 30.0]         | 22.0 (12.0-36.0) |
| Died – median (IQR)                        | 11.0 [7.0 18.0]         | 10.0 (6.0-17.0)  |

\* Richards-Belle, A., Orzechowska, I., Gould, D., Thomas, K., Doidge, J., Mouncey, P., Christian, M., Shankar-Hari, M., Harrison, D., Rowan, K., Banjo, Y., Borowczak, K., Cousins, T., Cummins, P., Dalemo, K., Darnell, R., Demissie, H., Drikite, L., Fleming, A., Frederiksen, D., Furnell, S., Hussein, A., Koelewyn, A., Matthews, T., Peters, S., Samuels, T., Saull, M. (2020). COVID-19 in critical care: epidemiology of the first epidemic wave across England, Wales and Northern Ireland Intensive Care Medicine <https://dx.doi.org/10.1007/s00134->

## Table S7- Clinical and physiological characteristics, outcomes and interventions according to ICU outcome.

| Clinical Characteristics                   |                     |         | Outcome               |         |                       |         | P Value                 |       |
|--------------------------------------------|---------------------|---------|-----------------------|---------|-----------------------|---------|-------------------------|-------|
| label                                      | units               | ALL     | Survivors             |         | Non-Survivors         |         |                         |       |
|                                            |                     | Total N | median [IQR] / N (%)  | Group N | median [IQR] / N (%)  | Group N | median [IQR] / N (%)    |       |
| Male                                       |                     | 633     | 481 (76%)             | 365     | 263 (72.1%)           | 268     | 218 (81.3%)             | 0.007 |
| White                                      |                     | 542     | 250 (46.1%)           | 310     | 143 (46.1%)           | 232     | 107 (46.1%)             | 0.949 |
| Age                                        | years               | 633     | 59.0 [51.0 66.0]      | 365     | 56.0 [47.0 63.0]      | 268     | 63.0 [57.0 70.0]        | 0.000 |
| BMI                                        | kg/m2               | 524     | 28.1 [24.9 32.8]      | 314     | 28.7 [25.1 33.6]      | 210     | 27.8 [24.7 31.2]        | 0.134 |
| Time since onset of symptoms               | days                | 408     | 8.0 [6.0 12.0]        | 242     | 9.0 [6.0 12.0]        | 166     | 7.0 [5.0 12.0]          | 0.101 |
| ICU length of stay                         | days                | 633     | 14.0 [8.0 23.0]       | 365     | 17.0 [9.8 30.0]       | 268     | 11.0 [7.0 18.0]         | 0.000 |
| Length of mechanical ventilation           | days                | 633     | 13.0 [7.0 22.0]       | 365     | 15.0 [8.0 28.0]       | 268     | 11.0 [6.0 16.0]         | 0.000 |
| ICU Mortality                              | %                   | 633     | 268 (42.3%)           | 365     | 0 (0%)                | 268     | 268 (100%)              | 0.000 |
| <b>Vent</b>                                |                     |         |                       |         |                       |         |                         |       |
| FiO <sub>2</sub> (%)                       |                     | 628     | 60.0 [45.0 80.0]      | 360     | 55.5 [40.0 70.0]      | 268     | 65.0 [55.0 80.0]        | 0.000 |
| PaO <sub>2</sub> to FiO <sub>2</sub> ratio |                     | 626     | 18.3 [13.0 25.0]      | 359     | 19.8 [13.9 27.5]      | 267     | 17.0 [12.3 23.0]        | 0.000 |
| Tidal Volume (mls/BW)                      | ml/Kg(BW)           | 472     | 6.8 [6.0 7.8]         | 286     | 6.9 [6.1 7.8]         | 186     | 6.8 [6.0 7.7]           | 0.351 |
| Respiratory rate                           | bpm                 | 627     | 18.8 [16.0 22.0]      | 360     | 18.0 [16.0 22.0]      | 267     | 20.0 [16.0 22.0]        | 0.357 |
| Minute ventilation                         | l/minute            | 606     | 8.5 [6.9 10.4]        | 348     | 8.5 [6.9 10.4]        | 258     | 8.6 [6.9 10.5]          | 0.449 |
| Peak pressure                              | ml/Kg(RBW)          | 599     | 26.0 [23.0 30.0]      | 344     | 25.3 [22.0 29.0]      | 255     | 27.0 [24.0 30.0]        | 0.000 |
| Plateau pressure                           | ml/Kg(BW)           | 80      | 26.0 [22.5 28.5]      | 38      | 24.0 [21.0 28.0]      | 42      | 26.5 [24.0 29.0]        | 0.012 |
| PEEP                                       | cmH <sub>2</sub> O  | 603     | 10.0 [8.0 12.0]       | 347     | 10.0 [8.0 12.0]       | 256     | 10.0 [10.0 12.0]        | 0.000 |
| Mean airway pressure                       | cmH <sub>2</sub> O  | 387     | 16.0 [13.2 19.0]      | 239     | 15.0 [13.0 18.0]      | 148     | 17.0 [14.0 20.0]        | 0.001 |
| Pressure support                           | cmH <sub>2</sub> O  | 371     | 10.0 [5.3 14.0]       | 217     | 10.0 [6.0 14.0]       | 154     | 10.0 [5.0 12.0]         | 0.516 |
| Dynamic Compliance                         | mls/cmH2O           | 564     | 31.5 [24.3 40.2]      | 327     | 32.5 [25.4 41.2]      | 237     | 30.0 [23.3 39.2]        | 0.033 |
| Oxygenation Index                          |                     | 387     | 8.1 [5.1 12.5]        | 239     | 7.1 [4.7 10.4]        | 148     | 9.7 [6.4 14.4]          | 0.000 |
| Ventilatory Ratio                          |                     | 470     | 1.5 [1.2 2.1]         | 284     | 1.5 [1.2 2.0]         | 186     | 1.6 [1.3 2.1]           | 0.033 |
| <b>ABG</b>                                 |                     |         |                       |         |                       |         |                         |       |
| Oxygen saturation                          |                     | 518     | 95.0 [93.0 98.0]      | 308     | 96.0 [93.0 98.0]      | 210     | 95.0 [92.0 97.0]        | 0.006 |
| pH                                         |                     | 630     | 7.4 [7.3 7.4]         | 363     | 7.4 [7.3 7.4]         | 267     | 7.3 [7.3 7.4]           | 0.000 |
| PaO <sub>2</sub>                           | kPa                 | 630     | 10.7 [9.2 13.1]       | 363     | 10.7 [9.1 12.8]       | 267     | 10.9 [9.2 13.4]         | 0.441 |
| PaCO <sub>2</sub>                          | kPa                 | 630     | 6.0 [5.2 7.2]         | 363     | 5.9 [5.2 6.9]         | 267     | 6.1 [5.2 7.3]           | 0.136 |
| Base excess                                |                     | 630     | -0.3 [-2.6 2.2]       | 363     | 0.2 [-2.1 2.5]        | 267     | -0.9 [-3.2 1.5]         | 0.001 |
| HCO <sub>3</sub>                           | mmol/L              | 629     | 24.5 [22.5 26.7]      | 362     | 24.9 [22.9 27.0]      | 267     | 23.9 [21.9 26.0]        | 0.000 |
| Lactate                                    | mmol/L              | 604     | 1.2 [1.0 1.6]         | 347     | 1.1 [0.9 1.5]         | 257     | 1.3 [1.1 1.8]           | 0.000 |
| <b>SOFA</b>                                |                     |         |                       |         |                       |         |                         |       |
| SOFA score                                 |                     | 428     | 9.0 [7.0 11.0]        | 246     | 8.0 [6.0 11.0]        | 182     | 10.0 [8.0 12.0]         | 0.000 |
| SOFA Respiratory                           |                     | 626     | 3.0 [3.0 4.0]         | 359     | 3.0 [3.0 4.0]         | 267     | 3.0 [3.0 4.0]           | 0.000 |
| SOFA Nervous                               |                     | 508     | 3.0 [0.0 4.0]         | 301     | 0.0 [0.0 4.0]         | 207     | 4.0 [0.0 4.0]           | 0.024 |
| SOFA Cardiovascular                        |                     | 579     | 3.0 [3.0 4.0]         | 328     | 3.0 [3.0 4.0]         | 251     | 3.0 [3.0 4.0]           | 0.000 |
| SOFA Liver                                 |                     | 588     | 0.0 [0.0 0.0]         | 335     | 0.0 [0.0 0.0]         | 253     | 0.0 [0.0 0.0]           | 0.678 |
| SOFA Coagulation                           |                     | 619     | 0.0 [0.0 0.0]         | 355     | 0.0 [0.0 0.0]         | 264     | 0.0 [0.0 0.0]           | 0.004 |
| SOFA Kidneys                               |                     | 629     | 0.0 [0.0 1.0]         | 362     | 0.0 [0.0 1.0]         | 267     | 0.0 [0.0 1.0]           | 0.007 |
| <b>FBC</b>                                 |                     |         |                       |         |                       |         |                         |       |
| Haemoglobin                                | g/dL                | 619     | 114.0 [92.0 128.0]    | 355     | 115.0 [95.0 128.0]    | 264     | 113.0 [85.8 129.0]      | 0.380 |
| Haematocrit                                |                     | 312     | 0.4 [0.3 0.4]         | 168     | 0.4 [0.3 0.4]         | 144     | 0.4 [0.3 0.4]           | 0.030 |
| White blood cell count                     | x10 <sup>9</sup> /L | 619     | 9.6 [7.0 13.1]        | 355     | 9.4 [6.9 12.6]        | 264     | 9.9 [7.3 13.5]          | 0.209 |
| Neutrophils                                | x10 <sup>9</sup> /L | 618     | 8.1 [5.7 11.3]        | 355     | 7.6 [5.3 10.7]        | 263     | 8.6 [6.2 12.3]          | 0.010 |
| Monocytes                                  | x10 <sup>9</sup> /L | 614     | 0.4 [0.3 0.7]         | 355     | 0.5 [0.3 0.7]         | 259     | 0.4 [0.2 0.7]           | 0.003 |
| Lymphocytes                                | x10 <sup>9</sup> /L | 615     | 0.8 [0.5 1.2]         | 355     | 0.9 [0.6 1.3]         | 260     | 0.7 [0.5 1.0]           | 0.000 |
| Basophils                                  | x10 <sup>9</sup> /L | 498     | 0.0 [0.0 0.1]         | 281     | 0.0 [0.0 0.1]         | 217     | 0.0 [0.0 0.0]           | 0.001 |
| Eosinophils                                | x10 <sup>9</sup> /L | 493     | 0.0 [0.0 0.1]         | 286     | 0.0 [0.0 0.1]         | 207     | 0.0 [0.0 0.1]           | 0.000 |
| <b>Coag</b>                                |                     |         |                       |         |                       |         |                         |       |
| Platelet Count                             | µmol/L              | 619     | 246.0 [185.3 320.8]   | 355     | 261.0 [199.0 334.8]   | 264     | 229.5 [171.0 305.5]     | 0.001 |
| APTT                                       | U/L                 | 398     | 32.1 [28.3 37.4]      | 209     | 32.0 [28.7 37.1]      | 189     | 32.1 [28.0 37.5]        | 0.603 |
| PT                                         | U/L                 | 396     | 13.9 [12.4 15.2]      | 209     | 13.9 [12.5 15.1]      | 187     | 13.8 [12.4 15.5]        | 0.713 |
| INR                                        | U/L                 | 212     | 1.1 [1.1 1.2]         | 113     | 1.1 [1.1 1.2]         | 99      | 1.1 [1.1 1.2]           | 0.616 |
| Fibrinogen                                 | U/L                 | 410     | 6.8 [5.6 8.1]         | 246     | 6.8 [5.8 8.0]         | 164     | 6.7 [5.4 8.2]           | 0.321 |
| D-dimer                                    | IU/L                | 391     | 2642.0 [990.5 7701.3] | 221     | 2270.0 [902.3 5680.0] | 170     | 3290.5 [1239.0 15575.0] | 0.002 |
| <b>Electrolytes</b>                        |                     |         |                       |         |                       |         |                         |       |
| Blood Urea Nitrogen (BUN)                  | mmol/L              | 498     | 7.4 [4.9 11.8]        | 277     | 6.8 [4.7 10.4]        | 221     | 8.4 [5.7 13.3]          | 0.000 |
| Creatinine                                 | µmol/L              | 621     | 88.0 [66.0 140.0]     | 356     | 82.0 [63.0 123.0]     | 265     | 99.0 [71.8 152.1]       | 0.000 |
| Sodium                                     | mmol/L              | 621     | 139.0 [136.0 142.0]   | 357     | 139.0 [136.0 142.0]   | 264     | 138.0 [135.0 141.0]     | 0.071 |
| Potassium                                  | mmol/L              | 620     | 4.4 [4.0 4.8]         | 356     | 4.4 [4.0 4.8]         | 264     | 4.4 [4.1 4.8]           | 0.462 |
| <b>Liver</b>                               |                     |         |                       |         |                       |         |                         |       |
| Bilirubin                                  | µmol/L              | 588     | 10.0 [7.0 15.0]       | 335     | 10.0 [7.0 14.0]       | 253     | 10.0 [7.0 15.0]         | 0.068 |
| Alkaline Phosphatase                       | U/L                 | 600     | 77.0 [58.5 113.0]     | 342     | 76.0 [53.0 116.0]     | 258     | 79.5 [62.0 110.0]       | 0.341 |
| AST                                        | U/L                 | 99      | 59.0 [39.3 85.0]      | 50      | 53.0 [37.0 63.0]      | 49      | 70.0 [43.3 96.8]        | 0.018 |
| ALT                                        | U/L                 | 592     | 37.0 [24.0 59.0]      | 338     | 37.0 [23.0 62.0]      | 254     | 37.0 [24.0 56.0]        | 0.820 |
| <b>Inflammation</b>                        |                     |         |                       |         |                       |         |                         |       |
| LDH (Lactate dehydrogenase)                | IU/L                | 194     | 649.0 [452.0 921.0]   | 109     | 614.0 [397.3 818.8]   | 85      | 683.0 [506.3 977.3]     | 0.079 |
| Ferritin                                   | ng/mL               | 290     | 2218.5 [696.0 2320.0] | 173     | 1144.0 [681.5 2056.3] | 117     | 1410.0 [714.8 2814.0]   | 0.025 |
| CRP                                        |                     | 592     | 215.7 [135.0 311.0]   | 350     | 200.5 [117.4 298.0]   | 242     | 242.2 [159.0 325.6]     | 0.000 |
| Procalcitonin                              | ug/L                | 125     | 0.7 [0.3 2.2]         | 86      | 0.5 [0.3 1.3]         | 39      | 1.6 [0.6 5.5]           | 0.000 |
| <b>Cardiac</b>                             |                     |         |                       |         |                       |         |                         |       |
| Creatinine Kinase                          | U/L                 | 243     | 217.0 [83.5 637.3]    | 132     | 202.0 [84.0 578.8]    | 111     | 222.0 [82.8 639.5]      | 0.733 |
| High sensitivity Troponin                  |                     | 253     | 21.8 [11.0 61.0]      | 147     | 16.0 [9.0 41.3]       | 106     | 29.4 [13.0 103.0]       | 0.001 |
| NT Pro BNP                                 | pg/ml               | 58      | 537.5 [165.0 1478.0]  | 37      | 349.0 [139.0 823.5]   | 21      | 857.0 [565.0 3416.8]    | 0.005 |
| <b>Fluid</b>                               |                     |         |                       |         |                       |         |                         |       |
| Cumulative Fluid balance                   | L                   | 589     | 343.0 [-212.3 1058.3] | 342     | 273.4 [-262.0 938.0]  | 247     | 413.0 [-182.4 1360.0]   | 0.033 |
| <b>Adjunctive interventions</b>            |                     |         |                       |         |                       |         |                         |       |
| Was patient transferred in?                |                     | 633     | 159 (25.1%)           | 365     | 103 (28.2%)           | 268     | 56 (20.9%)              | 0.036 |
| Tracheostomy                               |                     | 516     | 145 (28.1%)           | 305     | 122 (40%)             | 211     | 23 (10.9%)              | 0.000 |
| PEEP>10                                    |                     | 622     | 459 (73.8%)           | 359     | 231 (64.3%)           | 263     | 228 (86.7%)             | 0.000 |
| Neuro-muscular blockade                    |                     | 617     | 434 (70.3%)           | 354     | 215 (60.7%)           | 263     | 219 (83.3%)             | 0.000 |
| Prone positioning                          |                     | 551     | 273 (49.5%)           | 328     | 129 (39.3%)           | 223     | 144 (64.6%)             | 0.000 |
| Inhaled nitric oxide                       |                     | 521     | 73 (14%)              | 309     | 29 (9.39%)            | 212     | 44 (20.8%)              | 0.001 |
| Inhaled prostacyclin                       |                     | 521     | 55 (10.6%)            | 309     | 30 (9.71%)            | 212     | 25 (11.8%)              | 0.624 |
| Bronchoscopy                               |                     | 521     | 51 (9.79%)            | 309     | 33 (10.7%)            | 212     | 18 (8.49%)              | 0.288 |
| Renal replacement therapy                  |                     | 555     | 211 (38%)             | 322     | 89 (27.6%)            | 233     | 122 (52.4%)             | 0.000 |
| Diuretics                                  |                     | 598     | 443 (74.1%)           | 348     | 256 (73.6%)           | 250     | 187 (74.8%)             | 0.922 |
| Corticosteroids                            |                     | 582     | 304 (52.2%)           | 342     | 173 (50.6%)           | 240     | 131 (54.6%)             | 0.712 |
| Therapeutic heparin                        |                     | 438     | 55 (12.6%)            | 255     | 30 (11.8%)            | 183     | 25 (13.7%)              | 0.624 |
| Antibiotics                                |                     | 313     | 219 (70%)             | 168     | 109 (64.9%)           | 145     | 110 (75.9%)             | 0.003 |
| <b>Prone</b>                               |                     |         |                       |         |                       |         |                         |       |
| No of proning episodes                     |                     | 273     | 1.0 [1.0 2.0]         | 129     | 1.0 [1.0 2.0]         | 144     | 1.0 [1.0 2.0]           | 0.864 |
| mech vent prior first prone                | days                | 273     | 3.0 [1.8 6.0]         | 129     | 3.0 [1.0 6.0]         | 144     | 4.0 [2.0 7.0]           | 0.065 |
| duration of first prone                    | days                | 273     | 2.0 [1.0 4.0]         | 129     | 2.0 [1.0 4.0]         | 144     | 2.0 [1.0 3.5]           | 0.552 |
| responders to proning                      |                     | 270     | 119 (44.1%)           | 128     | 82 (64.1%)            | 142     | 37 (26.1%)              | 0.006 |
| missed windows prior to prone              |                     | 273     | 3.0 [1.0 6.0]         | 129     | 2.0 [0.8 5.0]         | 144     | 3.0 [1.0 7.0]           | 0.020 |
| missed windows - unproned                  |                     | 360     | 3.0 [1.0 10.0]        | 236     | 2.0 [0.0 6.0]         | 124     | 7.0 [3.0 15.5]          | 0.000 |
| <b>Tracheostomy</b>                        |                     |         |                       |         |                       |         |                         |       |
| mech vent prior to tracheostomy            | days                | 145     | 13.0 [9.0 18.0]       | 122     | 14.0 [10.0 18.0]      | 23      | 13.0 [4.0 18.8]         | 0.127 |
| duration of tracheostomy                   | days                | 145     | 14.0 [6.0 21.3]       | 122     | 15.0 [7.0 22.0]       | 23      | 6.0 [2.3 12.8]          | 0.001 |
| <b>End of life parameters</b>              |                     |         |                       |         |                       |         |                         |       |
| life sustaining therapy withdrawn          |                     | 130     | 85 (65.4%)            | 0       | 0 (NaN%)              | 130     | 85 (65.4%)              | 0.000 |
| cardiac arrest during admission            |                     | 244     | 21 (8.61%)            | 122     | 8 (6.56%)             | 122     | 13 (10.7%)              | 0.065 |





Table S9- Uni- and multi-variate model analysis of factors associated with ICU mortality.

| FieldLabel                           | median [IQR]             | Univariate |        |       |         | Multivariate |        |       |         |
|--------------------------------------|--------------------------|------------|--------|-------|---------|--------------|--------|-------|---------|
|                                      |                          | Odds ratio | 95% CI |       | P Value | Odds ratio   | 95% CI |       | P Value |
| Age                                  |                          | 2.017      | 1.694  | 2.401 | 0.000   | 1.951        | 1.584  | 2.402 | 0.000   |
| Male                                 |                          | 1.560      | 1.032  | 2.357 | 0.035   | 2.052        | 1.168  | 3.607 | 0.012   |
| BMI                                  | 28.13 [24.90 32.76]      | 0.850      | 0.724  | 0.997 | 0.046   | 0.844        | 0.687  | 1.038 | 0.108   |
| Height                               | 173.00 [165.00 178.00]   | 0.929      | 0.788  | 1.095 | 0.381   |              |        |       |         |
| symptoms days                        | 8.00 [6.00 12.00]        | 0.880      | 0.745  | 1.040 | 0.133   |              |        |       |         |
| Hypertension                         |                          | 1.318      | 0.932  | 1.863 | 0.119   |              |        |       |         |
| Diabetes mellitus                    |                          | 1.191      | 0.815  | 1.741 | 0.366   |              |        |       |         |
| Oxygen saturation                    | 95.00 [93.00 98.00]      | 0.816      | 0.695  | 0.959 | 0.013   | 1.078        | 0.872  | 1.332 | 0.487   |
| pH                                   | 7.36 [7.30 7.42]         | 0.796      | 0.683  | 0.928 | 0.004   | 0.849        | 0.670  | 1.074 | 0.172   |
| PaCO <sub>2</sub>                    | 5.96 [5.16 7.15]         | 1.056      | 0.907  | 1.230 | 0.484   |              |        |       |         |
| HCO <sup>-</sup> <sub>3</sub>        | 24.50 [22.48 26.70]      | 0.764      | 0.654  | 0.892 | 0.001   | 0.807        | 0.641  | 1.018 | 0.070   |
| Lactate                              | 1.20 [1.00 1.60]         | 1.522      | 1.294  | 1.791 | 0.000   | 1.523        | 1.210  | 1.917 | 0.000   |
| Peak pressure                        | 26.00 [23.00 30.00]      | 1.240      | 1.061  | 1.449 | 0.007   | 0.963        | 0.731  | 1.268 | 0.788   |
| PEEP                                 | 10.00 [8.00 12.00]       | 1.407      | 1.175  | 1.685 | 0.000   | 1.150        | 0.896  | 1.475 | 0.272   |
| Minute ventilation                   | 8.53 [6.88 10.44]        | 0.967      | 0.831  | 1.125 | 0.663   |              |        |       |         |
| Dynamic Comp                         | 31.47 [24.26 40.19]      | 0.860      | 0.735  | 1.005 | 0.058   | 0.706        | 0.543  | 0.919 | 0.010   |
| Oxygenation Index                    | 8.10 [5.09 12.45]        | 1.371      | 1.160  | 1.621 | 0.000   | 1.204        | 0.903  | 1.605 | 0.205   |
| Ventilatory Ratio                    | 1.54 [1.22 2.07]         | 1.152      | 0.983  | 1.349 | 0.081   | 1.151        | 0.911  | 1.453 | 0.238   |
| Cum fluid balance                    | 343.00 [-212.25 1058.32] | 1.163      | 0.997  | 1.356 | 0.055   | 0.874        | 0.715  | 1.068 | 0.188   |
| Glucose                              | 8.39 [6.79 10.95]        | 1.246      | 1.065  | 1.457 | 0.006   | 1.067        | 0.876  | 1.300 | 0.521   |
| BUN                                  | 7.40 [4.90 11.80]        | 1.412      | 1.202  | 1.657 | 0.000   | 1.058        | 0.805  | 1.392 | 0.685   |
| Sodium                               | 139.00 [136.00 142.00]   | 0.880      | 0.754  | 1.026 | 0.103   |              |        |       |         |
| Potassium                            | 4.40 [4.00 4.80]         | 1.040      | 0.891  | 1.213 | 0.620   |              |        |       |         |
| ALP                                  | 77.00 [58.50 113.00]     | 1.056      | 0.908  | 1.227 | 0.480   |              |        |       |         |
| ALT                                  | 37.00 [24.00 59.00]      | 0.966      | 0.830  | 1.124 | 0.652   |              |        |       |         |
| Haemoglobin                          | 114.00 [92.00 128.00]    | 0.928      | 0.800  | 1.078 | 0.329   |              |        |       |         |
| Neutrophils                          | 8.10 [5.71 11.30]        | 1.206      | 1.034  | 1.407 | 0.017   | 1.078        | 0.858  | 1.354 | 0.520   |
| Monocytes                            | 0.41 [0.30 0.70]         | 0.794      | 0.682  | 0.925 | 0.003   | 0.838        | 0.671  | 1.046 | 0.119   |
| Lymphocytes                          | 0.80 [0.50 1.20]         | 0.700      | 0.593  | 0.827 | 0.000   | 0.967        | 0.771  | 1.213 | 0.773   |
| Basophils                            | 0.00 [0.00 0.10]         | 0.465      | 0.304  | 0.712 | 0.000   | 0.684        | 0.391  | 1.195 | 0.182   |
| Eosinophils                          | 0.00 [0.00 0.10]         | 0.400      | 0.276  | 0.579 | 0.000   | 0.442        | 0.267  | 0.733 | 0.002   |
| APTT                                 | 32.10 [28.30 37.40]      | 0.968      | 0.817  | 1.148 | 0.710   |              |        |       |         |
| PT                                   | 13.85 [12.40 15.20]      | 1.105      | 0.937  | 1.303 | 0.236   |              |        |       |         |
| Fibrinogen                           | 6.80 [5.60 8.10]         | 0.953      | 0.808  | 1.125 | 0.571   |              |        |       |         |
| D-dimer                              | 2642.00 [990.50 7701.25] | 1.356      | 1.149  | 1.602 | 0.000   | 1.164        | 0.941  | 1.439 | 0.161   |
| CRP                                  | 215.65 [135.00 311.00]   | 1.286      | 1.100  | 1.505 | 0.002   | 1.039        | 0.842  | 1.281 | 0.722   |
| SOFA Respiratory                     |                          | 1.419      | 1.160  | 1.736 | 0.001   | 1.235        | 0.858  | 1.776 | 0.256   |
| SOFA Nervous                         |                          | 1.100      | 1.008  | 1.201 | 0.032   | 1.110        | 0.877  | 1.405 | 0.386   |
| SOFA Cardio                          |                          | 1.227      | 1.050  | 1.433 | 0.010   | 1.115        | 0.861  | 1.445 | 0.409   |
| SOFA Liver                           |                          | 1.079      | 0.787  | 1.479 | 0.638   |              |        |       |         |
| SOFA Coagulation                     |                          | 1.590      | 1.138  | 2.221 | 0.007   | 1.951        | 1.167  | 3.262 | 0.011   |
| SOFA Kidneys                         |                          | 1.192      | 1.017  | 1.399 | 0.031   | 1.172        | 0.836  | 1.643 | 0.356   |
| SOFA score                           |                          | 1.195      | 1.113  | 1.284 | 0.000   | 0.921        | 0.740  | 1.147 | 0.463   |
| * Died (N=235) vs Discharged (N=314) |                          |            |        |       |         |              |        |       |         |

Table S10 - Time series mixed model ANOVA according to ICU outcome.

| label                               | N   | p-values      |                     |              |                 |
|-------------------------------------|-----|---------------|---------------------|--------------|-----------------|
|                                     |     | Dead vs Alive | parameter over time | interaction  | FDR interaction |
| PaO <sub>2</sub> / FiO <sub>2</sub> | 472 | 0.000         | 0.000               | <b>0.000</b> | <b>0.000</b>    |
| Dynamic Compliance                  | 341 | 0.001         | 0.000               | <b>0.000</b> | <b>0.000</b>    |
| Respiratory rate                    | 458 | 0.062         | 0.001               | 0.561        | 0.632           |
| FiO <sub>2</sub> (%)                | 503 | 0.000         | 0.000               | <b>0.000</b> | <b>0.000</b>    |
| Tidal Volume per Kg                 | 347 | 0.993         | 0.343               | 0.537        | 0.632           |
| Tidal Volume                        | 433 | 0.285         | 0.388               | 0.699        | 0.724           |
| Minute ventilation                  | 404 | 0.039         | 0.000               | 0.285        | 0.405           |
| Peak pressure                       | 426 | 0.000         | 0.000               | <b>0.000</b> | <b>0.000</b>    |
| PEEP                                | 390 | 0.000         | 0.001               | 0.104        | 0.204           |
| Dynamic delta pressure (peakP-peep) | 124 | 0.001         | 0.058               | <b>0.009</b> | <b>0.022</b>    |
| Mean airway pressure                | 256 | 0.000         | 0.000               | <b>0.000</b> | <b>0.000</b>    |
| I:E ratio                           | 93  | 0.050         | 0.552               | 0.261        | 0.391           |
| Pressure support                    | 169 | 0.021         | 0.045               | 0.063        | 0.134           |
| Oxygen saturation                   | 417 | 0.000         | 0.125               | <b>0.002</b> | <b>0.007</b>    |
| pH                                  | 487 | 0.000         | 0.000               | <b>0.000</b> | <b>0.000</b>    |
| PaO <sub>2</sub>                    | 484 | 0.482         | 0.274               | 0.167        | 0.280           |
| PaCO <sub>2</sub>                   | 487 | 0.000         | 0.105               | <b>0.000</b> | <b>0.000</b>    |
| Base excess                         | 478 | 0.000         | 0.000               | 0.405        | 0.513           |
| HCO <sup>-3</sup>                   | 479 | 0.000         | 0.000               | 0.380        | 0.504           |
| Lactate                             | 451 | 0.000         | 0.187               | <b>0.011</b> | <b>0.026</b>    |
| Oxygenation Index                   | 237 | 0.000         | 0.000               | <b>0.000</b> | <b>0.000</b>    |
| Ventilatory Ratio                   | 314 | 0.009         | 0.000               | 0.116        | 0.212           |
| Mean arterial pressure (lowest)     | 386 | 0.000         | 0.000               | <b>0.000</b> | <b>0.000</b>    |
| Liver-Bilirubin                     | 167 | 0.017         | 0.103               | 0.248        | 0.382           |
| Daily fluid balance                 | 480 | 0.000         | 0.000               | 0.348        | 0.472           |
| Cumulative fluid balance            | 480 | 0.000         | 0.006               | <b>0.000</b> | <b>0.000</b>    |
| SOFA Score                          | 192 | 0.000         | 0.000               | <b>0.000</b> | <b>0.000</b>    |
| Non-Respiratory SOFA                | 224 | 0.000         | 0.000               | <b>0.000</b> | <b>0.000</b>    |
| Glucose                             | 465 | 0.021         | 0.020               | 0.114        | 0.212           |
| BUN                                 | 382 | 0.000         | 0.004               | <b>0.001</b> | <b>0.002</b>    |
| Creatinine                          | 520 | 0.000         | 0.120               | <b>0.000</b> | <b>0.000</b>    |
| Sodium                              | 523 | 0.706         | 0.000               | 0.393        | 0.509           |
| Potassium                           | 518 | 0.000         | 0.781               | <b>0.008</b> | <b>0.020</b>    |
| Bilirubin                           | 401 | 0.003         | 0.000               | <b>0.000</b> | <b>0.000</b>    |
| Alkaline Phosphatase                | 441 | 0.893         | 0.000               | 0.339        | 0.471           |
| AST                                 | 55  | 0.988         | 0.517               | 0.559        | 0.632           |
| ALT                                 | 418 | 0.092         | 0.000               | 0.231        | 0.366           |
| Creatinine Kinase                   | 127 | 0.643         | 0.275               | 0.467        | 0.579           |
| LDH                                 | 66  | 0.845         | 0.001               | 0.283        | 0.405           |
| Haemoglobin                         | 515 | 0.001         | 0.080               | 0.081        | 0.165           |
| WBC                                 | 513 | 0.017         | 0.003               | <b>0.014</b> | <b>0.031</b>    |
| RBC                                 | 415 | 0.256         | 0.486               | 0.535        | 0.632           |
| Platelet Count                      | 511 | 0.000         | 0.000               | <b>0.001</b> | <b>0.002</b>    |
| Haematocrit                         | 252 | 0.754         | 0.000               | <b>0.001</b> | <b>0.003</b>    |
| Neutrophils                         | 511 | 0.000         | 0.019               | <b>0.002</b> | <b>0.006</b>    |
| Monocytes                           | 509 | 0.000         | 0.000               | 0.138        | 0.238           |
| Lymphocytes                         | 509 | 0.000         | 0.000               | <b>0.008</b> | <b>0.020</b>    |
| Basophils                           | 361 | 0.020         | 0.007               | 0.570        | 0.632           |
| Eosinophils                         | 386 | 0.000         | 0.000               | 0.614        | 0.660           |
| APTT                                | 255 | 0.008         | 0.223               | <b>0.002</b> | <b>0.005</b>    |
| PT                                  | 260 | 0.671         | 0.632               | 0.654        | 0.691           |
| INR                                 | 163 | 0.895         | 0.954               | 0.836        | 0.836           |
| Fibrinogen                          | 137 | 0.518         | 0.007               | 0.577        | 0.632           |
| Ferritin                            | 75  | 0.123         | 0.184               | 0.119        | 0.212           |
| D-dimer                             | 147 | 0.000         | 0.949               | 0.772        | 0.785           |
| CRP                                 | 457 | 0.000         | 0.000               | <b>0.007</b> | <b>0.019</b>    |
| High sensitivity Troponin           | 62  | 0.204         | 0.069               | 0.198        | 0.323           |

Table S11 - Progression of hypoxaemia in COVID-19 as compared to pre-COVID ARDS publications.

| COVID-ICU        |           |              |           |       |       |
|------------------|-----------|--------------|-----------|-------|-------|
|                  |           | P/F on Day 7 |           |       | Total |
|                  |           | >26.7        | 13.3-26.6 | <13.3 |       |
| P/F on Admission | >26.7     | 51           | 71        | 18    | 140   |
|                  | 13.3-26.6 | 55           | 137       | 75    | 267   |
|                  | <13.3     | 8            | 58        | 42    | 108   |
|                  |           | 114          | 266       | 135   | 515   |

  

| LUNG SAFE        |           |              |           |       |       |
|------------------|-----------|--------------|-----------|-------|-------|
|                  |           | P/F on Day 7 |           |       | Total |
|                  |           | 26.7-40      | 13.3-26.6 | <13.3 |       |
| P/F on Admission | 26.7-40   |              | 184       | 32    | 714   |
|                  | 13.3-26.6 |              |           | 140   | 1106  |
|                  | <13.3     |              |           |       | 557   |
|                  |           |              |           |       | 2377  |

  

| Berlin Definition |           |              |           |       |       |
|-------------------|-----------|--------------|-----------|-------|-------|
|                   |           | P/F on Day 7 |           |       | Total |
|                   |           | 26.7-40      | 13.3-26.6 | <13.3 |       |
| P/F on Admission  | 26.7-40   |              | 234       | 33    | 819   |
|                   | 13.3-26.6 |              |           | 230   | 1820  |
|                   | <13.3     |              |           |       | 1031  |
|                   |           |              |           |       | 3670  |

  

| COVID-ICU        |           |              |           |       |         |
|------------------|-----------|--------------|-----------|-------|---------|
|                  |           | P/F on Day 7 |           |       | Overall |
|                  |           | >26.7        | 13.3-26.6 | <13.3 |         |
| P/F on Admission | >26.7     | 36.4%        | 50.7%     | 12.9% | 31.8%   |
|                  | 13.3-26.6 | 20.6%        | 51.3%     | 28.1% |         |
|                  | <13.3     | 7.4%         | 53.7%     | 38.9% |         |
|                  |           | 23.5%        |           |       | 44.7%   |

  

| LUNG SAFE        |           |              |           |       |         |
|------------------|-----------|--------------|-----------|-------|---------|
|                  |           | P/F on Day 7 |           |       | Overall |
|                  |           | 26.7-40      | 13.3-26.6 | <13.3 |         |
| P/F on Admission | 26.7-40   |              | 25.8%     | 4.5%  | 15.0%   |
|                  | 13.3-26.6 |              |           | 12.7% |         |
|                  | <13.3     |              |           |       |         |

  

| Berlin Definition |           |              |           |       |         |
|-------------------|-----------|--------------|-----------|-------|---------|
|                   |           | P/F on Day 7 |           |       | Overall |
|                   |           | 26.7-40      | 13.3-26.6 | <13.3 |         |
| P/F on Admission  | 26.7-40   |              | 28.6%     | 4.0%  | 13.5%   |
|                   | 13.3-26.6 |              |           | 12.6% |         |
|                   | <13.3     |              |           |       |         |

Table S12 - Clinical and physiological characteristics, outcomes and interventions according to resolution of hypoxaemia over first week of invasive mechanical ventilation.

| Clinical Characteristics                   | units               | Trajectory between admission and day7 |                       |               |                       | P Value |                        |
|--------------------------------------------|---------------------|---------------------------------------|-----------------------|---------------|-----------------------|---------|------------------------|
|                                            |                     | ALL                                   | Resolving             | Non resolving | Resolving             |         |                        |
| label                                      |                     | Total N                               | median [IQR] / N (%)  | Group N       | median [IQR] / N (%)  | Group N | median [IQR] / N (%)   |
| Male                                       |                     | 633                                   | 481 (76.1%)           | 267           | 196 (73.4%)           | 366     | 285 (77.9%)            |
| White                                      |                     | 542                                   | 250 (46.1%)           | 216           | 98 (45.4%)            | 326     | 152 (46.6%)            |
| Age                                        | years               | 633                                   | 59.0 [51.0 66.0]      | 267           | 57.0 [47.0 64.0]      | 366     | 60.0 [54.0 67.0]       |
| BMI                                        | kg/m2               | 524                                   | 28.1 [24.9 32.8]      | 222           | 28.0 [24.8 32.9]      | 302     | 28.2 [25.1 32.3]       |
| Time since onset of symptoms               | days                | 408                                   | 8.0 [6.0 12.0]        | 164           | 9.0 [6.5 13.5]        | 244     | 7.0 [6.0 11.0]         |
| ICU length of stay                         | days                | 633                                   | 14.0 [8.0 23.0]       | 267           | 13.0 [7.3 20.0]       | 366     | 15.0 [8.0 25.0]        |
| Length of mechanical ventilation           | days                | 633                                   | 13.0 [7.0 22.0]       | 267           | 12.0 [6.0 18.8]       | 366     | 14.0 [8.0 24.0]        |
| ICU Mortality                              | %                   | 633                                   | 268 (42.3%)           | 267           | 47 (17.6%)            | 366     | 221 (60.4%)            |
| <b>Vent</b>                                |                     |                                       |                       |               |                       |         |                        |
| FiO <sub>2</sub> (%)                       |                     | 628                                   | 60.0 [45.0 80.0]      | 263           | 60.0 [40.0 80.0]      | 365     | 60.0 [50.0 72.8]       |
| PaO <sub>2</sub> to FiO <sub>2</sub> ratio |                     | 626                                   | 18.3 [13.0 25.0]      | 262           | 17.9 [11.7 27.5]      | 364     | 18.4 [14.6 24.1]       |
| Tidal Volume (mls/BW)                      | ml/Kg(BW)           | 472                                   | 6.8 [6.0 7.8]         | 202           | 6.9 [6.1 7.8]         | 270     | 6.8 [6.0 7.7]          |
| Respiratory rate                           | bpm                 | 627                                   | 18.8 [16.0 22.0]      | 263           | 18.0 [16.0 22.0]      | 364     | 19.2 [16.0 22.4]       |
| Minute ventilation                         | L/minute            | 606                                   | 8.5 [6.9 10.4]        | 255           | 8.5 [7.0 10.2]        | 351     | 8.5 [6.9 10.5]         |
| Peak pressure                              | ml/Kg(RBW)          | 599                                   | 26.0 [23.0 30.0]      | 253           | 25.0 [22.0 29.0]      | 346     | 26.7 [24.0 30.0]       |
| Plateau pressure                           | ml/Kg(BW)           | 80                                    | 26.0 [22.5 28.5]      | 28            | 24.5 [21.5 29.0]      | 52      | 26.0 [23.0 28.0]       |
| PEEP                                       | cmH <sub>2</sub> O  | 603                                   | 10.0 [8.0 12.0]       | 257           | 10.0 [8.0 12.0]       | 346     | 10.0 [8.5 12.0]        |
| Mean airway pressure                       | cmH <sub>2</sub> O  | 387                                   | 16.0 [13.2 19.0]      | 174           | 15.8 [13.0 18.0]      | 213     | 16.0 [14.0 20.0]       |
| Pressure support                           | cmH <sub>2</sub> O  | 371                                   | 10.0 [5.3 14.0]       | 160           | 10.0 [5.0 12.5]       | 211     | 10.0 [6.3 14.0]        |
| Dynamic Compliance                         | mls/cmH2O           | 564                                   | 31.5 [24.3 40.2]      | 242           | 32.5 [25.2 40.9]      | 322     | 30.3 [24.0 40.1]       |
| Oxygenation Index                          |                     | 387                                   | 8.1 [5.1 12.5]        | 174           | 7.7 [4.6 13.0]        | 213     | 8.2 [5.3 11.6]         |
| Ventilatory Ratio                          |                     | 470                                   | 1.5 [1.2 2.1]         | 200           | 1.4 [1.2 2.0]         | 270     | 1.6 [1.3 2.1]          |
| <b>ABG</b>                                 |                     |                                       |                       |               |                       |         |                        |
| Oxygen saturation                          |                     | 518                                   | 95.0 [93.0 98.0]      | 224           | 96.0 [93.0 98.0]      | 294     | 95.0 [92.0 97.0]       |
| pH                                         |                     | 630                                   | 7.4 [7.3 7.4]         | 265           | 7.4 [7.3 7.4]         | 365     | 7.4 [7.3 7.4]          |
| PaO <sub>2</sub>                           | kPa                 | 630                                   | 10.7 [9.2 13.1]       | 265           | 10.4 [8.8 12.4]       | 365     | 10.9 [9.4 13.4]        |
| PaCO <sub>2</sub>                          | kPa                 | 630                                   | 6.0 [5.2 7.2]         | 265           | 6.0 [5.2 7.2]         | 365     | 6.0 [5.2 7.1]          |
| Base excess                                |                     | 630                                   | -0.3 [-2.6 2.2]       | 265           | 0.3 [-1.9 2.5]        | 365     | -0.7 [-3.0 1.8]        |
| HCO <sub>3</sub> <sup>-</sup>              | mmol/L              | 629                                   | 24.5 [22.5 26.7]      | 265           | 24.9 [23.0 27.2]      | 364     | 24.0 [22.0 26.4]       |
| Lactate                                    | mmol/L              | 604                                   | 1.2 [1.0 1.6]         | 260           | 1.2 [1.0 1.6]         | 344     | 1.3 [1.0 1.6]          |
| <b>SOFA</b>                                |                     |                                       |                       |               |                       |         |                        |
| SOFA score                                 |                     | 428                                   | 9.0 [7.0 11.0]        | 184           | 9.0 [7.0 11.0]        | 244     | 9.0 [7.0 11.0]         |
| SOFA Respiratory                           |                     | 626                                   | 3.0 [3.0 4.0]         | 262           | 3.0 [3.0 4.0]         | 364     | 3.0 [3.0 3.0]          |
| SOFA Nervous                               |                     | 508                                   | 3.0 [0.0 4.0]         | 218           | 2.0 [0.0 4.0]         | 290     | 4.0 [0.0 4.0]          |
| SOFA Cardiovascular                        |                     | 579                                   | 3.0 [3.0 4.0]         | 242           | 3.0 [1.0 4.0]         | 337     | 3.0 [3.0 4.0]          |
| SOFA Liver                                 |                     | 588                                   | 0.0 [0.0 0.0]         | 252           | 0.0 [0.0 0.0]         | 336     | 0.0 [0.0 0.0]          |
| SOFA Coagulation                           |                     | 619                                   | 0.0 [0.0 0.0]         | 257           | 0.0 [0.0 0.0]         | 362     | 0.0 [0.0 0.0]          |
| SOFA Kidneys                               |                     | 629                                   | 0.0 [0.0 1.0]         | 264           | 0.0 [0.0 1.0]         | 365     | 0.0 [0.0 1.0]          |
| <b>FBC</b>                                 |                     |                                       |                       |               |                       |         |                        |
| Haemoglobin                                | g/dL                | 619                                   | 114.0 [92.0 128.0]    | 257           | 113.0 [90.0 126.0]    | 362     | 115.0 [94.0 130.0]     |
| Haematocrit                                |                     | 312                                   | 0.4 [0.3 0.4]         | 126           | 0.4 [0.3 0.4]         | 186     | 0.4 [0.3 0.4]          |
| White blood cell count                     | x10 <sup>9</sup> /L | 619                                   | 9.6 [7.0 13.1]        | 257           | 9.6 [6.9 12.7]        | 362     | 9.6 [7.1 13.5]         |
| Neutrophils                                | x10 <sup>9</sup> /L | 618                                   | 8.1 [5.7 11.3]        | 257           | 7.9 [5.4 11.1]        | 361     | 8.3 [5.8 11.5]         |
| Monocytes                                  | x10 <sup>9</sup> /L | 614                                   | 0.4 [0.3 0.7]         | 256           | 0.5 [0.3 0.7]         | 358     | 0.4 [0.3 0.7]          |
| Lymphocytes                                | x10 <sup>9</sup> /L | 615                                   | 0.8 [0.5 1.2]         | 257           | 0.8 [0.6 1.3]         | 358     | 0.8 [0.5 1.1]          |
| Basophils                                  | x10 <sup>9</sup> /L | 498                                   | 0.0 [0.0 0.1]         | 201           | 0.0 [0.0 0.1]         | 297     | 0.0 [0.0 0.1]          |
| Eosinophils                                | x10 <sup>9</sup> /L | 493                                   | 0.0 [0.0 0.1]         | 205           | 0.0 [0.0 0.1]         | 288     | 0.0 [0.0 0.1]          |
| <b>Coag</b>                                |                     |                                       |                       |               |                       |         |                        |
| Platelet Count                             | µmol/L              | 619                                   | 246.0 [185.3 320.8]   | 257           | 245.0 [191.0 325.0]   | 362     | 246.0 [182.0 318.0]    |
| APTT                                       | U/L                 | 398                                   | 32.1 [28.3 37.4]      | 162           | 32.3 [28.3 38.0]      | 236     | 32.1 [28.3 36.5]       |
| PT                                         | U/L                 | 396                                   | 13.9 [12.4 15.2]      | 162           | 13.6 [12.1 15.1]      | 234     | 14.0 [12.7 15.4]       |
| INR                                        | U/L                 | 212                                   | 1.1 [1.1 1.2]         | 98            | 1.1 [1.1 1.2]         | 114     | 1.1 [1.0 1.2]          |
| Fibrinogen                                 | U/L                 | 410                                   | 6.8 [5.6 8.1]         | 179           | 6.6 [5.7 7.7]         | 231     | 6.9 [5.6 8.3]          |
| D-dimer                                    | IU/L                | 391                                   | 2642.0 [990.5 7701.3] | 177           | 2920.0 [977.5 8104.8] | 214     | 2418.0 [1060.0 7530.0] |
| <b>Electrolytes</b>                        |                     |                                       |                       |               |                       |         |                        |
| Blood Urea Nitrogen (BUN)                  | mmol/L              | 498                                   | 7.4 [4.9 11.8]        | 200           | 6.8 [4.5 10.8]        | 298     | 7.8 [5.4 12.1]         |
| Creatinine                                 | µmol/L              | 621                                   | 88.0 [66.0 140.0]     | 258           | 84.0 [64.0 129.0]     | 363     | 90.0 [67.0 148.0]      |
| Sodium                                     | mmol/L              | 621                                   | 139.0 [136.0 142.0]   | 259           | 139.0 [137.0 142.0]   | 362     | 138.0 [135.0 141.0]    |
| Potassium                                  | mmol/L              | 620                                   | 4.4 [4.0 4.8]         | 258           | 4.4 [4.0 4.8]         | 362     | 4.4 [4.1 4.8]          |
| <b>Liver</b>                               |                     |                                       |                       |               |                       |         |                        |
| Bilirubin                                  | µmol/L              | 588                                   | 10.0 [7.0 15.0]       | 252           | 10.0 [7.0 14.0]       | 336     | 10.0 [7.0 15.0]        |
| Alkaline Phosphatase                       | U/L                 | 600                                   | 77.0 [58.5 113.0]     | 255           | 79.0 [58.3 120.8]     | 345     | 75.0 [58.8 107.3]      |
| AST                                        | U/L                 | 99                                    | 59.0 [39.3 85.0]      | 43            | 56.0 [34.8 69.5]      | 56      | 62.0 [41.5 90.5]       |
| ALT                                        | U/L                 | 592                                   | 37.0 [24.0 59.0]      | 252           | 36.0 [23.0 59.5]      | 340     | 37.0 [24.0 59.0]       |
| <b>Inflammation</b>                        |                     |                                       |                       |               |                       |         |                        |
| LDH (Lactate dehydrogenase)                | IU/L                | 194                                   | 649.0 [452.0 921.0]   | 82            | 678.0 [443.0 1032.0]  | 112     | 615.5 [459.5 873.0]    |
| Ferritin                                   | ng/ml               | 290                                   | 1218.5 [696.0 2320.0] | 129           | 1023.0 [665.8 2080.3] | 161     | 1374.0 [780.5 2492.3]  |
| CRP                                        |                     | 592                                   | 215.7 [135.0 311.0]   | 255           | 208.0 [119.3 308.9]   | 337     | 218.0 [145.0 312.3]    |
| Procalcitonin                              | ug/L                | 125                                   | 0.7 [0.3 2.2]         | 61            | 0.6 [0.3 2.2]         | 64      | 0.8 [0.3 2.1]          |
| <b>Cardiac</b>                             |                     |                                       |                       |               |                       |         |                        |
| Creatinine Kinase                          | U/L                 | 243                                   | 217.0 [83.5 637.3]    | 108           | 194.5 [79.0 563.0]    | 135     | 226.0 [95.8 664.8]     |
| High sensitivity Troponin                  |                     | 253                                   | 21.8 [11.0 61.0]      | 116           | 17.5 [9.0 48.3]       | 137     | 25.7 [12.0 62.0]       |
| NT Pro BNP                                 | pg/ml               | 58                                    | 537.5 [165.0 1478.0]  | 28            | 454.0 [196.5 1498.5]  | 30      | 611.0 [161.0 1478.0]   |
| <b>Fluid</b>                               |                     |                                       |                       |               |                       |         |                        |
| Cumulative Fluid balance                   | L                   | 589                                   | 343.0 [-212.3 1058.3] | 256           | 287.0 [-244.5 991.8]  | 333     | 361.0 [-201.1 1160.3]  |
| <b>Adjuvant interventions</b>              |                     |                                       |                       |               |                       |         |                        |
| Was patient transferred?                   |                     | 633                                   | 159 (25.1%)           | 267           | 79 (29.6%)            | 366     | 80 (21.9%)             |
| Tracheostomy                               |                     | 516                                   | 145 (28.1%)           | 220           | 59 (26.8%)            | 296     | 86 (29.1%)             |
| PEEP>10                                    |                     | 622                                   | 459 (73.8%)           | 262           | 159 (60.7%)           | 360     | 300 (83.3%)            |
| Neuro-muscular blockade                    |                     | 617                                   | 434 (70.3%)           | 256           | 152 (59.4%)           | 361     | 282 (78.1%)            |
| Prono positioning                          |                     | 551                                   | 273 (49.5%)           | 234           | 90 (38.5%)            | 317     | 183 (57.7%)            |
| Inhaled nitric oxide                       |                     | 521                                   | 73 (14%)              | 224           | 21 (9.38%)            | 297     | 52 (17.5%)             |
| Inhaled prostacyclin                       |                     | 521                                   | 55 (10.6%)            | 224           | 18 (8.04%)            | 297     | 37 (12.5%)             |
| Bronchoscopy                               |                     | 521                                   | 51 (9.79%)            | 224           | 20 (8.93%)            | 297     | 31 (10.4%)             |
| Renal replacement therapy                  |                     | 555                                   | 211 (38%)             | 238           | 75 (31.5%)            | 317     | 136 (42.9%)            |
| Diuretics                                  |                     | 598                                   | 443 (74.1%)           | 247           | 171 (69.2%)           | 351     | 272 (77.5%)            |
| Corticosteroids                            |                     | 582                                   | 304 (52.2%)           | 247           | 115 (46.6%)           | 335     | 189 (56.4%)            |
| Therapeutic heparin                        |                     | 438                                   | 55 (12.6%)            | 176           | 18 (10.2%)            | 262     | 37 (14.1%)             |
| Antibiotics                                |                     | 313                                   | 219 (70%)             | 127           | 74 (58.3%)            | 186     | 145 (78%)              |
| <b>Prono</b>                               |                     |                                       |                       |               |                       |         |                        |
| No of prono episodes                       |                     | 273                                   | 1.0 [1.0 2.0]         | 90            | 1.0 [1.0 2.0]         | 183     | 1.0 [1.0 2.0]          |
| mech vent prior first prone                | days                | 273                                   | 3.0 [1.8 6.0]         | 90            | 2.0 [1.0 5.0]         | 183     | 4.0 [2.0 7.0]          |
| duration of first prone                    | days                | 273                                   | 2.0 [1.0 4.0]         | 90            | 2.0 [1.0 4.0]         | 183     | 2.0 [1.0 4.0]          |
| responders to prono                        |                     | 270                                   | 119 (44.1%)           | 88            | 53 (60.2%)            | 182     | 66 (36.3%)             |
| missed windows prior to prone              |                     | 273                                   | 3.0 [1.0 6.0]         | 90            | 2.0 [1.0 5.0]         | 183     | 3.0 [1.0 7.0]          |
| missed windows - unproned                  |                     | 360                                   | 3.0 [1.0 10.0]        | 177           | 1.0 [0.0 4.0]         | 183     | 6.0 [3.0 13.0]         |
| <b>Tracheostomy</b>                        |                     |                                       |                       |               |                       |         |                        |
| mech vent prior to tracheostomy            | days                | 145                                   | 13.0 [9.0 18.0]       | 59            | 13.0 [7.0 16.0]       | 86      | 15.0 [10.0 19.0]       |
| duration of tracheostomy                   | days                | 145                                   | 14.0 [6.0 21.3]       | 59            | 11.0 [4.3 22.0]       | 86      | 15.0 [8.0 21.0]        |
| <b>End of life parameters</b>              |                     |                                       |                       |               |                       |         |                        |
| life sustaining therapy withdrawn          |                     | 130                                   | 85 (65.4%)            | 19            | 12 (63.2%)            | 111     | 73 (65.8%)             |
| cardiac arrest during admission            |                     | 244                                   | 21 (8.61%)            | 85            | 4 (4.71%)             | 159     | 17 (10.7%)             |

Table S13 - Time series mixed model ANOVA according to resolution of hypoxaemia over first week of mechanical ventilation.

| label                               | N   | p-values                   |                     |              |                 |
|-------------------------------------|-----|----------------------------|---------------------|--------------|-----------------|
|                                     |     | Resolvers vs Non-Resolvers | parameter over time | interaction  | FDR interaction |
| PaO <sub>2</sub> / FiO <sub>2</sub> | 472 | 0.000                      | 0.000               | <b>0.000</b> | <b>0.000</b>    |
| Dynamic Compliance                  | 341 | 0.408                      | 0.039               | 0.226        | 0.379           |
| Respiratory rate                    | 458 | 0.556                      | 0.000               | 0.678        | 0.721           |
| FiO <sub>2</sub> (%)                | 503 | 0.000                      | 0.000               | <b>0.000</b> | <b>0.000</b>    |
| Tidal Volume per Kg                 | 347 | 0.782                      | 0.411               | 0.624        | 0.711           |
| Tidal Volume                        | 433 | 0.193                      | 0.612               | 0.654        | 0.721           |
| Minute ventilation                  | 404 | 0.292                      | 0.000               | 0.516        | 0.626           |
| Peak pressure                       | 426 | 0.002                      | 0.000               | <b>0.001</b> | <b>0.003</b>    |
| PEEP                                | 390 | 0.001                      | 0.000               | <b>0.001</b> | <b>0.003</b>    |
| Dynamic delta pressure (peakP-peep) | 124 | 0.559                      | 0.813               | 0.197        | 0.341           |
| Mean airway pressure                | 256 | 0.004                      | 0.000               | <b>0.000</b> | <b>0.000</b>    |
| I:E ratio                           | 93  | 0.280                      | 0.487               | 0.458        | 0.567           |
| Pressure support                    | 169 | 0.110                      | 0.032               | 0.076        | 0.166           |
| Oxygen saturation                   | 417 | 0.000                      | 0.175               | <b>0.001</b> | <b>0.004</b>    |
| pH                                  | 487 | 0.001                      | 0.000               | <b>0.001</b> | <b>0.005</b>    |
| PaO <sub>2</sub>                    | 484 | 0.008                      | 0.033               | <b>0.000</b> | <b>0.001</b>    |
| PaCO <sub>2</sub>                   | 487 | 0.035                      | 0.003               | <b>0.000</b> | <b>0.000</b>    |
| Base excess                         | 478 | 0.048                      | 0.000               | 0.063        | 0.149           |
| HCO <sup>-3</sup>                   | 479 | 0.106                      | 0.000               | <b>0.005</b> | <b>0.014</b>    |
| Lactate                             | 451 | 0.001                      | 0.310               | <b>0.026</b> | 0.069           |
| Oxygenation Index                   | 237 | 0.000                      | 0.000               | <b>0.000</b> | <b>0.000</b>    |
| Ventilatory Ratio                   | 314 | 0.301                      | 0.026               | 0.103        | 0.195           |
| Mean arterial pressure (lowest)     | 386 | 0.003                      | 0.000               | <b>0.001</b> | <b>0.005</b>    |
| Liver-Bilirubin                     | 167 | 0.262                      | 0.040               | 0.158        | 0.285           |
| Daily fluid balance                 | 480 | 0.001                      | 0.000               | 0.081        | 0.172           |
| Cumulative fluid balance            | 480 | 0.015                      | 0.074               | <b>0.001</b> | <b>0.005</b>    |
| SOFA Score                          | 192 | 0.157                      | 0.000               | <b>0.000</b> | <b>0.000</b>    |
| Non-Respiratory SOFA                | 224 | 0.349                      | 0.000               | <b>0.001</b> | <b>0.004</b>    |
| Glucose                             | 465 | 0.963                      | 0.012               | 0.056        | 0.138           |
| BUN                                 | 382 | 0.002                      | 0.010               | <b>0.004</b> | <b>0.012</b>    |
| Creatinine                          | 520 | 0.042                      | 0.096               | <b>0.000</b> | <b>0.001</b>    |
| Sodium                              | 523 | 0.796                      | 0.008               | 0.258        | 0.421           |
| Potassium                           | 518 | 0.010                      | 0.167               | 0.160        | 0.285           |
| Bilirubin                           | 401 | 0.284                      | 0.000               | <b>0.002</b> | <b>0.007</b>    |
| Alkaline Phosphatase                | 441 | 0.171                      | 0.000               | 0.706        | 0.721           |
| AST                                 | 55  | 0.914                      | 0.743               | 0.279        | 0.430           |
| ALT                                 | 418 | 0.226                      | 0.000               | 0.098        | 0.195           |
| Creatinine Kinase                   | 127 | 0.921                      | 0.174               | 0.580        | 0.674           |
| LDH                                 | 66  | 0.182                      | 0.046               | 0.397        | 0.539           |
| Haemoglobin                         | 515 | 0.787                      | 0.285               | 0.076        | 0.166           |
| WBC                                 | 513 | 0.516                      | 0.043               | 0.269        | 0.426           |
| RBC                                 | 415 | 0.857                      | 0.840               | 0.709        | 0.721           |
| Platelet Count                      | 511 | 0.048                      | 0.000               | 0.099        | 0.195           |
| Haematocrit                         | 252 | 0.866                      | 0.000               | <b>0.026</b> | 0.069           |
| Neutrophils                         | 511 | 0.994                      | 0.442               | 0.309        | 0.452           |
| Monocytes                           | 509 | 0.005                      | 0.000               | 0.303        | 0.452           |
| Lymphocytes                         | 509 | 0.124                      | 0.000               | <b>0.026</b> | 0.069           |
| Basophils                           | 361 | 0.138                      | 0.162               | 0.683        | 0.721           |
| Eosinophils                         | 386 | 0.001                      | 0.000               | 0.564        | 0.670           |
| APTT                                | 255 | 0.236                      | 0.660               | 0.326        | 0.465           |
| PT                                  | 260 | 0.912                      | 0.456               | 0.431        | 0.558           |
| INR                                 | 163 | 0.815                      | 0.175               | 0.440        | 0.558           |
| Fibrinogen                          | 137 | 0.063                      | 0.062               | 0.690        | 0.721           |
| Ferritin                            | 75  | 0.201                      | 0.472               | 0.404        | 0.539           |
| D-dimer                             | 147 | 0.967                      | 0.388               | 0.406        | 0.539           |
| CRP                                 | 457 | 0.001                      | 0.000               | <b>0.000</b> | <b>0.000</b>    |
| High sensitivity Troponin           | 62  | 0.704                      | 0.596               | 0.790        | 0.790           |

Table S14 - Uni- and multi-variate model analysis of factors associated with progression of hypoxaemia over the first week of invasive mechanical ventilation

| FieldLabel                    | median [IQR]             | Univariate |        |       |         | Multivariate |        |       |         |
|-------------------------------|--------------------------|------------|--------|-------|---------|--------------|--------|-------|---------|
|                               |                          | Odds ratio | 95% CI |       | P Value | Odds ratio   | 95% CI |       | P Value |
| Age                           |                          | 1.366      | 1.186  | 1.572 | 0.000   | 1.236        | 1.060  | 1.441 | 0.007   |
| Male                          |                          | 1.314      | 0.882  | 1.959 | 0.179   |              |        |       |         |
| BMI                           | 28.13 [24.90 32.76]      | 0.903      | 0.770  | 1.059 | 0.210   |              |        |       |         |
| Height                        | 173.00 [165.00 178.00]   | 0.942      | 0.799  | 1.110 | 0.473   |              |        |       |         |
| symptoms days                 | 8.00 [6.00 12.00]        | 0.857      | 0.724  | 1.013 | 0.071   | 0.940        | 0.784  | 1.127 | 0.503   |
| Hypertension                  |                          | 1.233      | 0.869  | 1.749 | 0.240   |              |        |       |         |
| Diabetes mellitus             |                          | 1.549      | 1.047  | 2.293 | 0.029   | 1.381        | 0.886  | 2.153 | 0.155   |
| Oxygen saturation             | 95.00 [93.00 98.00]      | 0.864      | 0.735  | 1.016 | 0.077   | 0.998        | 0.834  | 1.194 | 0.981   |
| pH                            | 7.36 [7.30 7.42]         | 0.919      | 0.789  | 1.070 | 0.274   |              |        |       |         |
| PaCO <sub>2</sub>             | 5.96 [5.16 7.15]         | 0.964      | 0.827  | 1.123 | 0.635   |              |        |       |         |
| HCO <sub>3</sub> <sup>-</sup> | 24.50 [22.48 26.70]      | 0.784      | 0.671  | 0.915 | 0.002   | 0.870        | 0.733  | 1.032 | 0.111   |
| Lactate                       | 1.20 [1.00 1.60]         | 1.197      | 1.024  | 1.398 | 0.024   | 1.030        | 0.862  | 1.231 | 0.748   |
| Peak pressure                 | 26.00 [23.00 30.00]      | 1.158      | 0.992  | 1.351 | 0.062   | 1.158        | 0.967  | 1.385 | 0.110   |
| PEEP                          | 10.00 [8.00 12.00]       | 1.268      | 1.067  | 1.508 | 0.007   | 1.109        | 0.902  | 1.363 | 0.328   |
| Minute ventilation            | 8.53 [6.88 10.44]        | 0.968      | 0.831  | 1.127 | 0.674   |              |        |       |         |
| Dynamic Comp                  | 31.47 [24.26 40.19]      | 0.898      | 0.768  | 1.050 | 0.178   |              |        |       |         |
| Oxygenation Index             | 8.10 [5.09 12.45]        | 1.020      | 0.866  | 1.201 | 0.812   |              |        |       |         |
| Ventilatory Ratio             | 1.54 [1.22 2.07]         | 1.088      | 0.929  | 1.274 | 0.295   |              |        |       |         |
| Cum fluid balance             | 343.00 [-212.25 1058.32] | 1.104      | 0.947  | 1.287 | 0.207   |              |        |       |         |
| Glucose                       | 8.39 [6.79 10.95]        | 1.163      | 0.995  | 1.359 | 0.058   | 1.026        | 0.854  | 1.232 | 0.786   |
| BUN                           | 7.40 [4.90 11.80]        | 1.237      | 1.057  | 1.449 | 0.008   | 1.183        | 0.983  | 1.422 | 0.075   |
| Sodium                        | 139.00 [136.00 142.00]   | 0.793      | 0.678  | 0.926 | 0.004   | 0.818        | 0.686  | 0.974 | 0.024   |
| Potassium                     | 4.40 [4.00 4.80]         | 1.064      | 0.912  | 1.241 | 0.430   |              |        |       |         |
| ALP                           | 77.00 [58.50 113.00]     | 0.941      | 0.809  | 1.094 | 0.429   |              |        |       |         |
| ALT                           | 37.00 [24.00 59.00]      | 1.050      | 0.902  | 1.223 | 0.526   |              |        |       |         |
| Haemoglobin                   | 114.00 [92.00 128.00]    | 1.116      | 0.960  | 1.296 | 0.152   |              |        |       |         |
| Neutrophils                   | 8.10 [5.71 11.30]        | 1.090      | 0.935  | 1.270 | 0.271   |              |        |       |         |
| Monocytes                     | 0.41 [0.30 0.70]         | 0.844      | 0.725  | 0.982 | 0.028   | 0.921        | 0.767  | 1.106 | 0.376   |
| Lymphocytes                   | 0.80 [0.50 1.20]         | 0.848      | 0.721  | 0.998 | 0.047   | 0.976        | 0.806  | 1.181 | 0.800   |
| Basophils                     | 0.00 [0.00 0.10]         | 0.811      | 0.544  | 1.208 | 0.302   |              |        |       |         |
| Eosinophils                   | 0.00 [0.00 0.10]         | 0.503      | 0.353  | 0.717 | 0.000   | 0.648        | 0.430  | 0.976 | 0.038   |
| APTT                          | 32.10 [28.30 37.40]      | 0.926      | 0.781  | 1.098 | 0.376   |              |        |       |         |
| PT                            | 13.85 [12.40 15.20]      | 1.065      | 0.903  | 1.256 | 0.456   |              |        |       |         |
| Fibrinogen                    | 6.80 [5.60 8.10]         | 1.052      | 0.891  | 1.242 | 0.552   |              |        |       |         |
| D-dimer                       | 2642.00 [990.50 7701.25] | 0.964      | 0.818  | 1.134 | 0.655   |              |        |       |         |
| CRP                           | 215.65 [135.00 311.00]   | 1.109      | 0.950  | 1.294 | 0.192   |              |        |       |         |
| SOFA Respiratory              |                          | 0.929      | 0.769  | 1.123 | 0.447   |              |        |       |         |
| SOFA Nervous                  |                          | 1.028      | 0.942  | 1.121 | 0.541   |              |        |       |         |
| SOFA Cardio                   |                          | 1.241      | 1.068  | 1.442 | 0.005   | 1.197        | 1.011  | 1.418 | 0.037   |
| SOFA Liver                    |                          | 0.983      | 0.715  | 1.350 | 0.915   |              |        |       |         |
| SOFA Coagulation              |                          | 1.207      | 0.865  | 1.683 | 0.267   |              |        |       |         |
| SOFA Kidneys                  |                          | 1.059      | 0.901  | 1.245 | 0.484   |              |        |       |         |
| SOFA score                    |                          | 1.036      | 0.968  | 1.109 | 0.301   |              |        |       |         |

\* NonResolvers (N=318) vs Resolvers (N=231)

Table S15 - The application, median start date and duration of the first episode of interventions

|                           | <b>Start day of first intervention</b> | <b>Duration of first intervention</b> | <b>Number of periods</b> |
|---------------------------|----------------------------------------|---------------------------------------|--------------------------|
| <b>interventions</b>      | median [IQR]                           | median [IQR]                          | median [IQR]             |
| Neuro-muscular blockade   | 1.0 [0.0 3.0]                          | 4.0 [1.0 7.0]                         | 1.0 [1.0 2.0]            |
| Prone positioning         | 2.0 [0.8 5.0]                          | 2.0 [1.0 4.0]                         | 1.0 [1.0 2.0]            |
| Inhaled nitric oxide      | 6.0 [3.0 9.0]                          | 4.0 [2.0 7.3]                         | 1.0 [1.0 1.0]            |
| Inhaled prostacyclin      | 7.0 [3.0 15.0]                         | 3.0 [1.0 6.8]                         | 1.0 [1.0 1.0]            |
| Tracheostomy              | 14.0 [9.0 18.0]                        | 13.0 [6.0 20.0]                       | 1.0 [1.0 1.0]            |
| APRV                      | 3.0 [0.5 6.0]                          | 3.0 [2.0 5.0]                         | 1.0 [1.0 1.0]            |
| Bronchoscopy              | 9.0 [3.0 15.8]                         | 1.0 [1.0 1.0]                         | 1.0 [1.0 1.0]            |
| Renal replacement therapy | 3.0 [1.0 6.0]                          | 5.0 [3.0 11.0]                        | 1.0 [1.0 2.0]            |
| Diuretics                 | 1.0 [1.0 3.0]                          | 3.0 [1.0 5.0]                         | 2.0 [1.0 3.0]            |
| Corticosteroids           | 5.0 [1.0 10.0]                         | 4.0 [2.0 9.0]                         | 1.0 [1.0 2.0]            |
| Therapeutic heparin       | 9.0 [6.0 14.0]                         | 5.0 [2.0 8.8]                         | 1.0 [1.0 1.0]            |
| Anti-Bacterial            | 0.0 [0.0 0.0]                          | 6.0 [4.0 9.0]                         | 1.0 [1.0 2.0]            |



## Table S16 - Clinical and physiological characteristics, outcomes and interventions according to prone responsiveness.

| Clinical Characteristics                   |                        |         | Prone responsiveness  |            |                       |                |                        | P Value |
|--------------------------------------------|------------------------|---------|-----------------------|------------|-----------------------|----------------|------------------------|---------|
|                                            |                        |         | ALL                   | Responders |                       | Non-Responders |                        |         |
| label                                      | units                  | Total N | median [IQR] / N (%)  | Group N    | median [IQR] / N (%)  | Group N        | median [IQR] / N (%)   |         |
| Male                                       |                        | 270     | 203 (75.2%)           | 119        | 93 (78.2%)            | 151            | 110 (72.8%)            | 0.316   |
| White                                      |                        | 219     | 115 (52.5%)           | 90         | 43 (47.8%)            | 129            | 72 (55.8%)             | 0.057   |
| Age                                        | years                  | 270     | 60.0 [54.0 66.0]      | 119        | 58.0 [50.0 64.0]      | 151            | 60.0 [56.3 66.0]       | 0.001   |
| BMI                                        | kg/m <sup>2</sup>      | 239     | 29.0 [25.3 33.2]      | 107        | 29.4 [26.2 33.2]      | 132            | 28.0 [24.8 33.2]       | 0.220   |
| Time since onset of symptoms               | days                   | 181     | 7.0 [6.0 11.0]        | 75         | 8.0 [6.0 12.8]        | 106            | 7.0 [6.0 11.0]         | 0.282   |
| ICU length of stay                         | days                   | 270     | 18.0 [11.0 29.0]      | 119        | 19.0 [12.3 30.8]      | 151            | 16.0 [10.0 26.0]       | 0.043   |
| Length of mechanical ventilation           | days                   | 270     | 16.0 [10.0 26.0]      | 119        | 18.0 [11.0 28.5]      | 151            | 15.0 [10.0 23.8]       | 0.055   |
| ICU Mortality                              | %                      | 270     | 142 (52.6%)           | 119        | 37 (31.3%)            | 151            | 105 (69.5%)            | 0.000   |
| <b>Vent</b>                                |                        |         |                       |            |                       |                |                        |         |
| FiO <sub>2</sub> (%)                       |                        | 269     | 65.0 [50.0 80.0]      | 119        | 60.0 [50.0 80.0]      | 150            | 70.0 [60.0 80.0]       | 0.022   |
| PaO <sub>2</sub> to FiO <sub>2</sub> ratio |                        | 269     | 16.4 [12.1 21.9]      | 119        | 17.9 [13.5 23.3]      | 150            | 15.0 [11.4 19.6]       | 0.000   |
| Tidal Volume (mls/BW)                      | ml/Kg(BW)              | 220     | 6.8 [6.1 7.8]         | 99         | 6.8 [6.2 7.9]         | 121            | 6.8 [6.0 7.7]          | 0.581   |
| Respiratory rate                           | bpm                    | 268     | 20.0 [16.0 24.0]      | 118        | 20.0 [18.0 24.0]      | 150            | 18.0 [16.0 22.0]       | 0.021   |
| Minute ventilation                         | L/minute               | 256     | 8.7 [6.9 10.4]        | 115        | 9.1 [7.7 10.6]        | 141            | 8.5 [6.7 10.1]         | 0.024   |
| Peak pressure                              | ml/Kg(BW)              | 256     | 27.0 [24.0 30.0]      | 117        | 27.0 [24.0 29.0]      | 139            | 28.0 [25.0 30.8]       | 0.032   |
| Plateau pressure                           | cmH <sub>2</sub> O     | 48      | 28.0 [24.0 29.0]      | 20         | 26.5 [22.0 29.5]      | 28             | 28.0 [25.5 28.5]       | 0.612   |
| PEEP                                       | cmH <sub>2</sub> O     | 259     | 10.0 [10.0 12.0]      | 116        | 10.0 [10.0 12.0]      | 143            | 10.8 [10.0 14.0]       | 0.124   |
| Mean airway pressure                       | cmH <sub>2</sub> O     | 143     | 17.0 [14.3 19.0]      | 73         | 17.0 [15.0 18.0]      | 70             | 16.5 [14.0 21.0]       | 0.805   |
| Pressure support                           | cmH <sub>2</sub> O     | 150     | 10.0 [8.0 14.0]       | 60         | 10.0 [7.0 15.0]       | 90             | 10.0 [8.0 14.0]        | 0.504   |
| Dynamic Compliance                         | mls/cmH <sub>2</sub> O | 237     | 30.0 [24.0 38.1]      | 109        | 31.0 [23.5 39.9]      | 128            | 29.4 [24.4 36.6]       | 0.509   |
| Oxygenation Index                          |                        | 143     | 9.3 [6.4 13.6]        | 73         | 8.7 [5.9 11.1]        | 70             | 11.0 [6.9 16.2]        | 0.003   |
| Ventilatory Ratio                          |                        | 219     | 1.7 [1.4 2.2]         | 98         | 1.8 [1.4 2.2]         | 121            | 1.7 [1.2 2.3]          | 0.617   |
| <b>ABG</b>                                 |                        |         |                       |            |                       |                |                        |         |
| Oxygen saturation                          |                        | 242     | 94.5 [92.0 97.0]      | 113        | 95.0 [92.0 97.0]      | 129            | 94.0 [92.0 96.0]       | 0.167   |
| pH                                         |                        | 270     | 7.3 [7.3 7.4]         | 119        | 7.3 [7.3 7.4]         | 151            | 7.4 [7.3 7.4]          | 0.916   |
| PaO <sub>2</sub>                           | kPa                    | 270     | 10.6 [9.0 12.4]       | 119        | 10.5 [9.2 12.6]       | 151            | 10.6 [8.8 12.3]        | 0.539   |
| PaCO <sub>2</sub>                          | kPa                    | 270     | 6.2 [5.3 7.4]         | 119        | 6.2 [5.3 7.3]         | 151            | 6.4 [5.4 7.4]          | 0.358   |
| Base excess                                |                        | 270     | 0.2 [-2.6 2.7]        | 119        | 0.2 [-2.4 2.3]        | 151            | 0.2 [-2.6 3.2]         | 0.794   |
| HCO <sub>3</sub>                           | mmol/L                 | 269     | 24.4 [22.4 27.0]      | 118        | 24.6 [22.4 26.7]      | 151            | 24.2 [22.4 27.1]       | 0.739   |
| Lactate                                    | mmol/L                 | 256     | 1.2 [1.0 1.6]         | 110        | 1.1 [0.9 1.5]         | 146            | 1.3 [1.1 1.7]          | 0.000   |
| <b>SOFA</b>                                |                        |         |                       |            |                       |                |                        |         |
| SOFA score                                 |                        | 174     | 9.0 [7.0 11.0]        | 75         | 8.0 [7.0 10.0]        | 99             | 9.0 [7.3 11.0]         | 0.239   |
| SOFA Respiratory                           |                        | 269     | 3.0 [3.0 4.0]         | 119        | 3.0 [3.0 4.0]         | 150            | 3.0 [3.0 4.0]          | 0.000   |
| SOFA Nervous                               |                        | 205     | 4.0 [0.0 4.0]         | 88         | 4.0 [0.0 4.0]         | 117            | 4.0 [0.0 4.0]          | 0.208   |
| SOFA Cardiovascular                        |                        | 248     | 3.0 [1.0 4.0]         | 110        | 3.0 [1.0 3.0]         | 138            | 3.0 [3.0 4.0]          | 0.000   |
| SOFA Liver                                 |                        | 252     | 0.0 [0.0 0.0]         | 110        | 0.0 [0.0 0.0]         | 142            | 0.0 [0.0 0.0]          | 0.968   |
| SOFA Coagulation                           |                        | 267     | 0.0 [0.0 0.0]         | 116        | 0.0 [0.0 0.0]         | 151            | 0.0 [0.0 0.0]          | 0.877   |
| SOFA Kidneys                               |                        | 269     | 0.0 [0.0 1.0]         | 118        | 0.0 [0.0 1.0]         | 151            | 0.0 [0.0 1.0]          | 0.257   |
| <b>FBC</b>                                 |                        |         |                       |            |                       |                |                        |         |
| Haemoglobin                                | g/dL                   | 267     | 116.0 [91.3 128.0]    | 116        | 115.5 [95.0 127.8]    | 151            | 117.0 [88.3 129.0]     | 0.783   |
| Haematocrit                                |                        | 178     | 0.4 [0.3 0.4]         | 86         | 0.4 [0.3 0.4]         | 92             | 0.4 [0.3 0.4]          | 0.564   |
| White blood cell count                     | x10 <sup>9</sup> /L    | 267     | 9.7 [7.3 12.8]        | 116        | 9.6 [7.1 12.6]        | 151            | 9.8 [7.5 12.9]         | 0.643   |
| Neutrophils                                | x10 <sup>9</sup> /L    | 267     | 8.3 [6.1 11.3]        | 116        | 8.1 [5.6 11.1]        | 151            | 8.3 [6.5 11.7]         | 0.347   |
| Monocytes                                  | x10 <sup>9</sup> /L    | 264     | 0.4 [0.3 0.6]         | 115        | 0.4 [0.3 0.6]         | 149            | 0.4 [0.3 0.6]          | 0.808   |
| Lymphocytes                                | x10 <sup>9</sup> /L    | 265     | 0.7 [0.5 1.1]         | 115        | 0.8 [0.5 1.2]         | 150            | 0.7 [0.5 1.1]          | 0.632   |
| Basophils                                  | x10 <sup>9</sup> /L    | 223     | 0.0 [0.0 0.1]         | 100        | 0.0 [0.0 0.1]         | 123            | 0.0 [0.0 0.0]          | 0.517   |
| Eosinophils                                | x10 <sup>9</sup> /L    | 220     | 0.0 [0.0 0.1]         | 101        | 0.0 [0.0 0.1]         | 119            | 0.0 [0.0 0.1]          | 0.412   |
| <b>Coag</b>                                |                        |         |                       |            |                       |                |                        |         |
| Platelet Count                             | µmol/L                 | 267     | 247.0 [190.3 321.0]   | 116        | 247.5 [196.0 329.5]   | 151            | 247.0 [190.0 333.5]    | 0.812   |
| APTT                                       | U/L                    | 193     | 31.7 [28.0 35.3]      | 86         | 31.8 [28.0 35.6]      | 107            | 31.4 [27.8 34.9]       | 0.451   |
| PT                                         | U/L                    | 192     | 13.6 [12.1 14.9]      | 86         | 13.3 [12.1 14.7]      | 106            | 13.8 [12.1 15.4]       | 0.196   |
| INR                                        | U/L                    | 127     | 1.1 [1.1 1.2]         | 66         | 1.1 [1.1 1.2]         | 61             | 1.1 [1.1 1.2]          | 0.521   |
| Fibrinogen                                 | U/L                    | 188     | 6.9 [5.7 8.2]         | 93         | 6.9 [5.6 8.0]         | 95             | 7.1 [5.9 8.3]          | 0.144   |
| D-dimer                                    | U/L                    | 171     | 2540.0 [947.0 6208.5] | 73         | 1694.0 [880.0 3895.0] | 98             | 3213.5 [1385.0 8329.0] | 0.009   |
| <b>Electrolytes</b>                        |                        |         |                       |            |                       |                |                        |         |
| Blood Urea Nitrogen (BUN)                  | mmol/L                 | 189     | 7.0 [5.0 11.0]        | 67         | 6.6 [5.0 9.9]         | 122            | 7.6 [5.1 11.9]         | 0.345   |
| Creatinine                                 | µmol/L                 | 267     | 84.0 [63.0 125.8]     | 117        | 85.0 [65.8 133.3]     | 150            | 82.0 [63.0 118.0]      | 0.309   |
| Sodium                                     | mmol/L                 | 268     | 138.0 [136.0 141.0]   | 118        | 138.0 [135.0 140.0]   | 150            | 139.0 [136.0 143.0]    | 0.128   |
| Potassium                                  | mmol/L                 | 268     | 4.4 [4.1 4.7]         | 118        | 4.5 [4.2 4.8]         | 150            | 4.4 [4.0 4.7]          | 0.204   |
| <b>Liver</b>                               |                        |         |                       |            |                       |                |                        |         |
| Bilirubin                                  | µmol/L                 | 252     | 10.0 [7.0 15.0]       | 110        | 10.0 [7.0 15.0]       | 142            | 10.0 [8.0 15.0]        | 0.245   |
| Alkaline Phosphatase                       | U/L                    | 257     | 76.0 [56.8 109.0]     | 113        | 76.0 [53.0 110.0]     | 144            | 75.0 [65.0 108.0]      | 0.548   |
| AST                                        | U/L                    | 52      | 61.0 [41.0 80.5]      | 22         | 59.0 [42.0 91.0]      | 30             | 61.5 [40.0 79.0]       | 0.985   |
| ALT                                        | U/L                    | 253     | 37.0 [26.0 56.3]      | 111        | 37.0 [26.3 57.8]      | 142            | 36.5 [25.0 56.0]       | 0.978   |
| <b>Inflammation</b>                        |                        |         |                       |            |                       |                |                        |         |
| DH (Lactate dehydrogenase)                 | U/L                    | 110     | 712.5 [520.0 1004.0]  | 55         | 783.0 [532.0 1141.8]  | 55             | 677.0 [514.0 968.3]    | 0.404   |
| Ferritin                                   | ng/mL                  | 149     | 1297.0 [711.8 2520.0] | 68         | 1038.0 [629.5 2215.0] | 81             | 1410.0 [773.3 2776.8]  | 0.115   |
| CRP                                        |                        | 252     | 235.0 [158.6 322.6]   | 117        | 229.8 [155.5 323.3]   | 135            | 239.3 [160.0 321.7]    | 0.597   |
| Procalcitonin                              | ug/L                   | 47      | 0.9 [0.4 2.4]         | 19         | 0.6 [0.3 2.3]         | 28             | 1.2 [0.6 2.9]          | 0.190   |
| <b>Cardiac</b>                             |                        |         |                       |            |                       |                |                        |         |
| Creatinine Kinase                          | U/L                    | 122     | 248.5 [122.0 638.0]   | 61         | 373.0 [187.1 847.3]   | 61             | 155.0 [92.8 515.8]     | 0.004   |
| High sensitivity Troponin                  |                        | 132     | 21.9 [11.8 57.5]      | 65         | 15.0 [8.8 50.8]       | 67             | 25.0 [14.4 61.8]       | 0.022   |
| NT Pro BNP                                 | pg/ml                  | 26      | 621.0 [173.0 1983.0]  | 10         | 313.5 [165.0 680.0]   | 16             | 810.5 [502.0 2587.0]   | 0.058   |
| <b>Fluid</b>                               |                        |         |                       |            |                       |                |                        |         |
| Cumulative Fluid balance                   | L                      | 251     | 384.0 [-196.6 1160.0] | 109        | 143.0 [-272.3 753.8]  | 142            | 622.0 [-114.0 1363.0]  | 0.004   |
| <b>Adjunctive interventions</b>            |                        |         |                       |            |                       |                |                        |         |
| Was patient transferred in?                |                        | 270     | 87 (32.2%)            | 119        | 48 (40.3%)            | 151            | 39 (25.8%)             | 0.011   |
| Tracheostomy                               |                        | 243     | 77 (31.7%)            | 113        | 41 (36.3%)            | 130            | 36 (27.7%)             | 0.055   |
| PEEP>10                                    |                        | 268     | 239 (89.2%)           | 119        | 102 (85.7%)           | 149            | 137 (91.9%)            | 0.199   |
| Neuro-muscular blockade                    |                        | 269     | 246 (91.4%)           | 118        | 107 (90.7%)           | 151            | 139 (92.1%)            | 0.540   |
| Prone positioning                          |                        | 270     | 270 (100%)            | 119        | 119 (100%)            | 151            | 151 (100%)             |         |
| Inhaled nitric oxide                       |                        | 243     | 66 (27.2%)            | 113        | 20 (17.7%)            | 130            | 46 (35.4%)             | 0.010   |
| Inhaled prostacyclin                       |                        | 243     | 35 (14.4%)            | 113        | 9 (7.96%)             | 130            | 26 (20%)               | 0.019   |
| Bronchoscopy                               |                        | 243     | 34 (14%)              | 113        | 18 (15.9%)            | 130            | 16 (12.3%)             | 0.265   |
| Renal replacement therapy                  |                        | 250     | 112 (44.8%)           | 115        | 48 (41.7%)            | 135            | 64 (47.4%)             | 0.735   |
| Diuretics                                  |                        | 268     | 210 (78.4%)           | 118        | 90 (76.3%)            | 150            | 120 (80%)              | 0.451   |
| Corticosteroids                            |                        | 264     | 154 (58.3%)           | 118        | 65 (55.1%)            | 146            | 89 (61%)               | 0.477   |
| Therapeutic heparin                        |                        | 187     | 33 (17.6%)            | 75         | 14 (18.7%)            | 112            | 19 (17%)               | 0.839   |
| Antibiotics                                |                        | 179     | 119 (66.5%)           | 87         | 46 (52.9%)            | 92             | 73 (79.3%)             | 0.111   |
| <b>Prone</b>                               |                        |         |                       |            |                       |                |                        |         |
| No of proning episodes                     |                        | 270     | 1.0 [1.0 2.0]         | 119        | 1.0 [1.0 2.0]         | 151            | 1.0 [1.0 2.0]          | 0.073   |
| mech vent prior first prone                | days                   | 270     | 3.0 [1.0 6.0]         | 119        | 3.0 [2.0 5.8]         | 151            | 3.0 [1.0 7.0]          | 0.357   |
| duration of first prone                    | days                   | 270     | 2.0 [1.0 4.0]         | 119        | 2.0 [1.0 4.0]         | 151            | 2.0 [1.0 4.0]          | 0.413   |
| responders to proning                      |                        | 270     | 119 (44.1%)           | 119        | 119 (100%)            | 151            | 0 (0%)                 | 0.000   |
| missed windows prior to prone              |                        | 270     | 3.0 [1.0 6.0]         | 119        | 2.0 [1.0 5.0]         | 151            | 3.0 [1.0 7.0]          | 0.022   |
|                                            |                        | 0       | NaN [NaN NaN]         | 0          | NaN [NaN NaN]         | 0              | NaN [NaN NaN]          |         |
| <b>Tracheostomy</b>                        |                        |         |                       |            |                       |                |                        |         |
| mech vent prior to tracheostomy            | days                   | 77      | 16.0 [11.0 20.0]      | 41         | 16.0 [12.0 19.3]      | 36             | 14.5 [8.5 20.0]        | 0.352   |
| duration of tracheostomy                   | days                   | 77      | 14.0 [6.0 21.3]       | 41         | 15.0 [7.8 22.0]       | 36             | 11.5 [4.0 20.0]        | 0.129   |
| <b>End of life parameters</b>              |                        |         |                       |            |                       |                |                        |         |
| life sustaining therapy withdrawn          |                        | 90      | 61 (67.8%)            | 31         | 22 (71%)              | 59             | 39 (66.1%)             | 0.152   |
| cardiac arrest during admission            |                        | 139     | 13 (9.35%)            | 58         | 7 (12.1%)             | 81             | 6 (7.41%)              | 0.467   |

Table S17 - Time series mixed model ANOVA according to prone responsiveness.

| label                               | N   | p-values                           |                     |              |                 |
|-------------------------------------|-----|------------------------------------|---------------------|--------------|-----------------|
|                                     |     | Prone Responders vs non-Responders | parameter over time | interaction  | FDR interaction |
| PaO <sub>2</sub> / FiO <sub>2</sub> | 234 | 0.000                              | 0.000               | <b>0.000</b> | <b>0.000</b>    |
| Dynamic Compliance                  | 171 | 0.813                              | 0.819               | 0.817        | 0.872           |
| Respiratory rate                    | 219 | 0.993                              | 0.645               | 0.143        | 0.590           |
| FiO <sub>2</sub> (%)                | 239 | 0.000                              | 0.000               | <b>0.000</b> | <b>0.001</b>    |
| Tidal Volume per Kg                 | 186 | 0.477                              | 0.779               | 0.867        | 0.883           |
| Tidal Volume                        | 216 | 0.186                              | 0.659               | 0.799        | 0.872           |
| Minute ventilation                  | 197 | 0.803                              | 0.449               | 0.368        | 0.619           |
| Peak pressure                       | 212 | 0.002                              | 0.649               | 0.333        | 0.619           |
| PEEP                                | 197 | 0.699                              | 0.929               | 0.826        | 0.872           |
| Dynamic delta pressure (peakP-peep) | 78  | 0.014                              | 0.487               | 0.929        | 0.929           |
| Mean airway pressure                | 117 | 0.670                              | 0.019               | <b>0.003</b> | <b>0.021</b>    |
| I:E ratio                           | 42  | 0.881                              | 0.923               | 0.711        | 0.811           |
| Pressure support                    | 84  | 0.775                              | 0.766               | 0.703        | 0.811           |
| Oxygen saturation                   | 218 | 0.000                              | 0.119               | <b>0.002</b> | <b>0.015</b>    |
| pH                                  | 239 | 0.047                              | 0.021               | 0.316        | 0.619           |
| PaO <sub>2</sub>                    | 239 | 0.000                              | 0.011               | <b>0.001</b> | <b>0.010</b>    |
| PaCO <sub>2</sub>                   | 239 | 0.004                              | 0.003               | 0.442        | 0.619           |
| Base excess                         | 234 | 0.689                              | 0.000               | 0.367        | 0.619           |
| HCO <sup>-3</sup>                   | 236 | 0.529                              | 0.000               | 0.857        | 0.883           |
| Lactate                             | 216 | 0.000                              | 0.505               | 0.385        | 0.619           |
| Oxygenation Index                   | 113 | 0.000                              | 0.001               | <b>0.001</b> | <b>0.010</b>    |
| Ventilatory Ratio                   | 167 | 0.053                              | 0.404               | 0.427        | 0.619           |
| Mean arterial pressure (lowest)     | 198 | 0.320                              | 0.409               | 0.513        | 0.676           |
| Liver-Bilirubin                     | 70  | 0.668                              | 0.727               | 0.696        | 0.811           |
| Daily fluid balance                 | 227 | 0.038                              | 0.295               | 0.257        | 0.619           |
| Cumulative fluid balance            | 227 | 0.035                              | 0.129               | 0.108        | 0.558           |
| SOFA Score                          | 97  | 0.045                              | 0.445               | 0.298        | 0.619           |
| Non-Respiratory SOFA                | 108 | 0.100                              | 0.541               | 0.346        | 0.619           |
| Glucose                             | 208 | 0.930                              | 0.771               | 0.677        | 0.811           |
| BUN                                 | 158 | 0.703                              | 0.000               | 0.785        | 0.872           |
| Creatinine                          | 249 | 0.855                              | 0.757               | 0.065        | 0.372           |
| Sodium                              | 251 | 0.192                              | 0.036               | 0.194        | 0.619           |
| Potassium                           | 246 | 0.915                              | 0.492               | 0.413        | 0.619           |
| Bilirubin                           | 192 | 0.884                              | 0.277               | 0.227        | 0.619           |
| Alkaline Phosphatase                | 205 | 0.808                              | 0.000               | 0.342        | 0.619           |
| AST                                 | 35  | 0.098                              | 0.054               | 0.225        | 0.619           |
| ALT                                 | 197 | 0.054                              | 0.000               | <b>0.000</b> | <b>0.005</b>    |
| Creatinine Kinase                   | 88  | 0.132                              | 0.417               | 0.419        | 0.619           |
| LDH                                 | 52  | 0.162                              | 0.374               | 0.359        | 0.619           |
| Haemoglobin                         | 246 | 0.433                              | 0.202               | 0.351        | 0.619           |
| WBC                                 | 246 | 0.441                              | 0.001               | 0.138        | 0.590           |
| RBC                                 | 220 | 0.074                              | 0.651               | 0.582        | 0.737           |
| Platelet Count                      | 244 | 0.040                              | 0.000               | <b>0.000</b> | <b>0.005</b>    |
| Haematocrit                         | 162 | 0.608                              | 0.000               | 0.437        | 0.619           |
| Neutrophils                         | 246 | 0.143                              | 0.057               | 0.340        | 0.619           |
| Monocytes                           | 244 | 0.956                              | 0.000               | 0.522        | 0.676           |
| Lymphocytes                         | 245 | 0.881                              | 0.000               | <b>0.043</b> | 0.275           |
| Basophils                           | 191 | 0.683                              | 0.037               | 0.468        | 0.635           |
| Eosinophils                         | 193 | 0.874                              | 0.002               | 0.153        | 0.590           |
| APTT                                | 137 | 0.424                              | 0.800               | 0.420        | 0.619           |
| PT                                  | 140 | 0.718                              | 0.306               | 0.445        | 0.619           |
| INR                                 | 110 | 0.381                              | 0.667               | 0.266        | 0.619           |
| Fibrinogen                          | 80  | 0.033                              | 0.021               | 0.654        | 0.811           |
| Ferritin                            | 55  | 0.224                              | 0.565               | 0.344        | 0.619           |
| D-dimer                             | 70  | 0.009                              | 0.562               | 0.374        | 0.619           |
| CRP                                 | 217 | 0.203                              | 0.042               | 0.227        | 0.619           |
| High sensitivity Troponin           | 47  | 0.963                              | 0.395               | 0.155        | 0.590           |

Table S18 - Uni- and multi-variate model analysis of pre-pronation factors associated prone responsiveness.

| FieldLabel                    | median [IQR]               | Univariate |        |       | Multivariate |            |        |       |         |
|-------------------------------|----------------------------|------------|--------|-------|--------------|------------|--------|-------|---------|
|                               |                            | Odds ratio | 95% CI |       | P Value      | Odds ratio | 95% CI |       | P Value |
| Age                           |                            | 1.555      | 1.197  | 2.019 | 0.001        | 1.557      | 1.165  | 2.081 | 0.003   |
| Male                          |                            | 0.875      | 0.474  | 1.617 | 0.671        |            |        |       |         |
| BMI                           | 29.00 [25.28 33.18]        | 0.865      | 0.681  | 1.099 | 0.234        |            |        |       |         |
| Height                        | 172.35 [165.00 178.00]     | 1.045      | 0.821  | 1.330 | 0.718        |            |        |       |         |
| symptoms days                 | 7.00 [6.00 11.00]          | 1.039      | 0.810  | 1.332 | 0.764        |            |        |       |         |
| Hypertension                  |                            | 1.061      | 0.616  | 1.827 | 0.832        |            |        |       |         |
| Diabetes mellitus             |                            | 1.393      | 0.749  | 2.591 | 0.296        |            |        |       |         |
| Oxygen saturation             | 93.00 [91.00 96.00]        | 0.758      | 0.589  | 0.975 | 0.031        | 0.982      | 0.714  | 1.351 | 0.911   |
| pH                            | 7.37 [7.31 7.42]           | 0.865      | 0.683  | 1.094 | 0.225        |            |        |       |         |
| PaCO <sub>2</sub>             | 6.70 [5.80 7.67]           | 1.257      | 0.989  | 1.598 | 0.062        | 1.198      | 0.890  | 1.611 | 0.234   |
| HCO <sup>-</sup> <sub>3</sub> | 26.60 [24.00 30.65]        | 0.988      | 0.784  | 1.247 | 0.922        |            |        |       |         |
| Lactate                       | 1.30 [1.10 1.80]           | 1.610      | 1.260  | 2.057 | 0.000        | 1.331      | 0.992  | 1.785 | 0.057   |
| Peak pressure                 | 28.06 [25.00 31.00]        | 1.568      | 1.232  | 1.995 | 0.000        | 1.423      | 1.063  | 1.906 | 0.018   |
| PEEP                          | 11.00 [10.00 13.00]        | 1.359      | 1.062  | 1.738 | 0.015        | 1.256      | 0.927  | 1.702 | 0.142   |
| Minute ventilation            | 9.88 [8.19 11.96]          | 1.083      | 0.854  | 1.374 | 0.510        |            |        |       |         |
| Dynamic Comp                  | 30.14 [24.00 38.59]        | 0.981      | 0.770  | 1.251 | 0.880        |            |        |       |         |
| Ventilatory Ratio             | 2.11 [1.61 2.57]           | 1.159      | 0.903  | 1.488 | 0.246        |            |        |       |         |
| Cum fluid balance             | 1743.00 [216.14 4269.60]   | 1.445      | 1.133  | 1.843 | 0.003        | 1.232      | 0.919  | 1.650 | 0.162   |
| Glucose                       | 9.10 [7.50 11.10]          | 0.982      | 0.775  | 1.244 | 0.882        |            |        |       |         |
| BUN                           | 10.00 [6.93 15.60]         | 1.095      | 0.857  | 1.399 | 0.466        |            |        |       |         |
| Sodium                        | 141.00 [139.00 146.00]     | 1.217      | 0.964  | 1.537 | 0.099        | 1.189      | 0.890  | 1.589 | 0.241   |
| Potassium                     | 4.53 [4.30 4.90]           | 1.107      | 0.877  | 1.397 | 0.392        |            |        |       |         |
| ALP                           | 85.00 [65.00 136.00]       | 0.991      | 0.782  | 1.255 | 0.940        |            |        |       |         |
| ALT                           | 40.00 [27.00 58.00]        | 0.834      | 0.659  | 1.056 | 0.132        |            |        |       |         |
| Haemoglobin                   | 103.00 [75.50 116.88]      | 0.931      | 0.738  | 1.174 | 0.543        |            |        |       |         |
| Haematocrit                   | 0.33 [0.30 0.38]           | 0.970      | 0.753  | 1.250 | 0.816        |            |        |       |         |
| Neutrophils                   | 8.80 [6.92 11.78]          | 1.149      | 0.910  | 1.453 | 0.244        |            |        |       |         |
| Monocytes                     | 0.40 [0.30 0.70]           | 0.920      | 0.718  | 1.179 | 0.510        |            |        |       |         |
| Lymphocytes                   | 0.80 [0.55 1.10]           | 0.898      | 0.715  | 1.128 | 0.356        |            |        |       |         |
| Basophils                     | 0.02 [0.00 0.10]           | 1.232      | 0.921  | 1.650 | 0.160        |            |        |       |         |
| Eosinophils                   | 0.10 [0.00 0.20]           | 0.986      | 0.715  | 1.360 | 0.931        |            |        |       |         |
| APTT                          | 32.83 [29.00 37.85]        | 0.874      | 0.681  | 1.123 | 0.293        |            |        |       |         |
| PT                            | 14.00 [12.10 15.30]        | 1.138      | 0.883  | 1.466 | 0.318        |            |        |       |         |
| Fibrinogen                    | 7.30 [6.10 8.91]           | 0.967      | 0.758  | 1.235 | 0.790        |            |        |       |         |
| D-dimer                       | 4017.50 [1630.00 10580.00] | 1.141      | 0.886  | 1.470 | 0.308        |            |        |       |         |
| CRP                           | 277.50 [183.45 339.00]     | 1.080      | 0.850  | 1.371 | 0.530        |            |        |       |         |
| SOFA Respiratory              | 3.00 [3.00 3.00]           | 1.894      | 1.352  | 2.654 | 0.000        | 1.708      | 1.168  | 2.499 | 0.006   |
| SOFA Nervous                  |                            | 0.932      | 0.810  | 1.072 | 0.326        |            |        |       |         |
| SOFA Cardio                   |                            | 1.442      | 1.168  | 1.781 | 0.001        | 1.346      | 1.039  | 1.742 | 0.024   |
| SOFA Liver                    |                            | 0.933      | 0.615  | 1.414 | 0.744        |            |        |       |         |
| SOFA Coagulation              |                            | 1.616      | 0.866  | 3.017 | 0.132        |            |        |       |         |
| SOFA Kidneys                  |                            | 0.948      | 0.749  | 1.199 | 0.654        |            |        |       |         |
| Prone initiation day          |                            | 1.044      | 0.981  | 1.110 | 0.175        |            |        |       |         |

\* non-resp (N=127) vs repsonive (N=101)

Table S19 - Uni- and multi-variate model analysis of post- pronation factors associated prone responsiveness.

| FieldLabel                    | median [IQR]             | Univariate |        |       |         | Multivariate |        |       |         |
|-------------------------------|--------------------------|------------|--------|-------|---------|--------------|--------|-------|---------|
|                               |                          | Odds ratio | 95% CI |       | P Value | Odds ratio   | 95% CI |       | P Value |
| Age                           |                          | 1.485      | 1.164  | 1.893 | 0.001   | 1.431        | 1.082  | 1.892 | 0.012   |
| Male                          |                          | 1.344      | 0.734  | 2.460 | 0.338   |              |        |       |         |
| BMI                           | 29.00 [25.28 33.18]      | 0.849      | 0.672  | 1.073 | 0.171   |              |        |       |         |
| Height                        | 172.35 [165.00 178.00]   | 1.057      | 0.835  | 1.339 | 0.643   |              |        |       |         |
| symptoms days                 | 7.00 [6.00 11.00]        | 1.057      | 0.829  | 1.347 | 0.654   |              |        |       |         |
| Hypertension                  |                          | 1.085      | 0.644  | 1.828 | 0.758   |              |        |       |         |
| Diabetes mellitus             |                          | 1.395      | 0.777  | 2.505 | 0.265   |              |        |       |         |
| Oxygen saturation             | 93.00 [91.00 95.00]      | 0.683      | 0.540  | 0.864 | 0.001   | 0.799        | 0.603  | 1.059 | 0.119   |
| pH                            | 7.35 [7.29 7.41]         | 0.851      | 0.680  | 1.065 | 0.160   |              |        |       |         |
| PaCO <sub>2</sub>             | 6.85 [6.01 8.10]         | 1.225      | 0.976  | 1.536 | 0.080   | 1.210        | 0.930  | 1.575 | 0.156   |
| HCO <sup>-</sup> <sub>3</sub> | 26.80 [23.90 30.20]      | 1.011      | 0.808  | 1.264 | 0.926   |              |        |       |         |
| Lactate                       | 1.30 [1.00 1.70]         | 1.640      | 1.290  | 2.086 | 0.000   | 1.316        | 0.998  | 1.737 | 0.052   |
| Peak pressure                 | 28.00 [25.88 31.00]      | 1.468      | 1.163  | 1.854 | 0.001   | 1.432        | 1.101  | 1.862 | 0.007   |
| PEEP                          | 11.00 [10.00 13.00]      | 1.214      | 0.961  | 1.535 | 0.104   |              |        |       |         |
| Minute ventilation            | 9.89 [7.91 11.38]        | 0.956      | 0.764  | 1.196 | 0.693   |              |        |       |         |
| Dynamic Comp                  | 30.18 [21.83 40.96]      | 0.924      | 0.733  | 1.166 | 0.506   |              |        |       |         |
| Ventilatory Ratio             | 2.05 [1.64 2.50]         | 1.184      | 0.934  | 1.501 | 0.162   |              |        |       |         |
| Cum fluid balance             | 2319.00 [389.06 5227.73] | 1.217      | 0.965  | 1.536 | 0.098   | 0.922        | 0.693  | 1.227 | 0.579   |
| Glucose                       | 8.95 [7.39 11.33]        | 1.181      | 0.933  | 1.494 | 0.167   |              |        |       |         |
| BUN                           | 10.65 [6.90 16.35]       | 1.152      | 0.911  | 1.458 | 0.238   |              |        |       |         |
| Sodium                        | 142.00 [138.00 146.00]   | 1.151      | 0.916  | 1.446 | 0.227   |              |        |       |         |
| Potassium                     | 4.60 [4.30 5.00]         | 0.963      | 0.766  | 1.212 | 0.748   |              |        |       |         |
| ALP                           | 94.00 [67.00 142.25]     | 1.051      | 0.837  | 1.320 | 0.666   |              |        |       |         |
| ALT                           | 41.00 [30.00 61.00]      | 0.928      | 0.738  | 1.168 | 0.525   |              |        |       |         |
| Haemoglobin                   | 100.00 [79.00 117.25]    | 0.941      | 0.750  | 1.179 | 0.596   |              |        |       |         |
| Haematocrit                   | 0.34 [0.29 0.37]         | 0.922      | 0.727  | 1.171 | 0.507   |              |        |       |         |
| Neutrophils                   | 8.60 [6.86 11.90]        | 1.128      | 0.903  | 1.410 | 0.289   |              |        |       |         |
| Monocytes                     | 0.43 [0.30 0.70]         | 0.818      | 0.652  | 1.027 | 0.083   | 0.758        | 0.581  | 0.990 | 0.042   |
| Lymphocytes                   | 0.72 [0.50 1.10]         | 0.865      | 0.687  | 1.090 | 0.219   |              |        |       |         |
| Basophils                     | 0.01 [0.00 0.10]         | 0.965      | 0.712  | 1.307 | 0.817   |              |        |       |         |
| Eosinophils                   | 0.10 [0.00 0.20]         | 0.947      | 0.697  | 1.285 | 0.725   |              |        |       |         |
| APTT                          | 32.40 [28.65 37.82]      | 1.042      | 0.821  | 1.323 | 0.733   |              |        |       |         |
| PT                            | 13.70 [11.90 14.95]      | 1.117      | 0.881  | 1.416 | 0.360   |              |        |       |         |
| CRP                           | 289.00 [183.50 348.75]   | 0.946      | 0.751  | 1.192 | 0.638   |              |        |       |         |
| SOFA Respiratory              | 3.00 [3.00 4.00]         | 2.233      | 1.513  | 3.297 | 0.000   | 1.946        | 1.231  | 3.078 | 0.004   |
| SOFA Nervous                  |                          | 0.910      | 0.791  | 1.046 | 0.186   |              |        |       |         |
| SOFA Cardio                   |                          | 1.420      | 1.163  | 1.735 | 0.001   | 1.134        | 0.893  | 1.441 | 0.301   |
| SOFA Liver                    |                          | 0.996      | 0.654  | 1.518 | 0.986   |              |        |       |         |
| SOFA Coagulation              |                          | 1.190      | 0.726  | 1.951 | 0.490   |              |        |       |         |
| SOFA Kidneys                  |                          | 0.932      | 0.747  | 1.162 | 0.531   |              |        |       |         |
| Prone initiation day          |                          | 1.044      | 0.982  | 1.111 | 0.167   |              |        |       |         |

\* non-resp (N=138) vs repsonsive (N=109)

Table S20 - Time series mixed model ANOVA according to ARDS on admission

| label                               | N   | ARDS Group | p-values            |              |                 |
|-------------------------------------|-----|------------|---------------------|--------------|-----------------|
|                                     |     |            | parameter over time | interaction  | FDR interaction |
| PaO <sub>2</sub> / FiO <sub>2</sub> | 472 | 0.000      | 0.000               | <b>0.000</b> | <b>0.000</b>    |
| Dynamic Compliance                  | 341 | 0.000      | 0.011               | 0.304        | 0.656           |
| Respiratory rate                    | 458 | 0.118      | 0.000               | 0.820        | 0.922           |
| FiO <sub>2</sub> (%)                | 503 | 0.000      | 0.000               | <b>0.000</b> | <b>0.000</b>    |
| Tidal Volume per Kg                 | 347 | 0.506      | 0.267               | 0.854        | 0.922           |
| Tidal Volume                        | 433 | 0.606      | 0.119               | 0.811        | 0.922           |
| Minute ventilation                  | 404 | 0.041      | 0.000               | 0.750        | 0.913           |
| Peak pressure                       | 426 | 0.000      | 0.000               | <b>0.000</b> | <b>0.003</b>    |
| PEEP                                | 390 | 0.000      | 0.103               | 0.566        | 0.798           |
| Dynamic delta pressure (peakP-peep) | 124 | 0.022      | 0.001               | 0.227        | 0.656           |
| Mean airway pressure                | 256 | 0.000      | 0.173               | 0.117        | 0.450           |
| I:E ratio                           | 93  | 0.015      | 0.656               | 0.461        | 0.798           |
| Pressure support                    | 169 | 0.415      | 0.878               | 0.917        | 0.934           |
| Oxygen saturation                   | 417 | 0.001      | 0.000               | <b>0.001</b> | <b>0.007</b>    |
| pH                                  | 487 | 0.000      | 0.014               | 0.574        | 0.798           |
| PaO <sub>2</sub>                    | 484 | 0.000      | 0.000               | <b>0.000</b> | <b>0.000</b>    |
| PaCO <sub>2</sub>                   | 487 | 0.000      | 0.000               | <b>0.043</b> | 0.196           |
| Base excess                         | 478 | 0.022      | 0.000               | 0.577        | 0.798           |
| HCO <sup>-3</sup>                   | 479 | 0.001      | 0.000               | 0.525        | 0.798           |
| Lactate                             | 451 | 0.046      | 0.000               | <b>0.009</b> | 0.065           |
| Oxygenation Index                   | 237 | 0.000      | 0.000               | <b>0.000</b> | <b>0.000</b>    |
| Ventilatory Ratio                   | 314 | 0.003      | 0.000               | 0.381        | 0.736           |
| Mean arterial pressure (lowest)     | 386 | 0.610      | 0.045               | 0.847        | 0.922           |
| Liver-Bilirubin                     | 167 | 0.574      | 0.133               | 0.294        | 0.656           |
| Daily fluid balance                 | 480 | 0.042      | 0.194               | 0.281        | 0.656           |
| Cumulative fluid balance            | 480 | 0.013      | 0.424               | 0.145        | 0.497           |
| SOFA Score                          | 192 | 0.019      | 0.712               | 0.740        | 0.913           |
| Non-Respiratory SOFA                | 224 | 0.019      | 0.066               | 0.163        | 0.517           |
| Glucose                             | 465 | 0.290      | 0.312               | 0.761        | 0.913           |
| BUN                                 | 382 | 0.075      | 0.000               | 0.532        | 0.798           |
| Creatinine                          | 520 | 0.314      | 0.841               | <b>0.011</b> | 0.065           |
| Sodium                              | 523 | 0.431      | 0.000               | 0.820        | 0.922           |
| Potassium                           | 518 | 0.139      | 0.853               | <b>0.010</b> | 0.065           |
| Bilirubin                           | 401 | 0.124      | 0.192               | 0.706        | 0.913           |
| Alkaline Phosphatase                | 441 | 0.116      | 0.000               | 0.147        | 0.497           |
| AST                                 | 55  | 0.018      | 0.729               | 0.626        | 0.845           |
| ALT                                 | 418 | 0.912      | 0.000               | <b>0.014</b> | 0.076           |
| Creatinine Kinase                   | 127 | 0.433      | 0.796               | 0.719        | 0.913           |
| Haemoglobin                         | 515 | 0.978      | 0.147               | 0.083        | 0.343           |
| WBC                                 | 513 | 0.751      | 0.002               | 0.487        | 0.798           |
| RBC                                 | 415 | 0.049      | 0.743               | 0.967        | 0.967           |
| Platelet Count                      | 511 | 0.191      | 0.000               | 0.264        | 0.656           |
| Haematocrit                         | 252 | 0.190      | 0.001               | <b>0.039</b> | 0.192           |
| Neutrophils                         | 511 | 0.054      | 0.020               | 0.288        | 0.656           |
| Monocytes                           | 509 | 0.002      | 0.000               | 0.563        | 0.798           |
| Lymphocytes                         | 509 | 0.256      | 0.001               | 0.558        | 0.798           |
| Basophils                           | 361 | 0.883      | 0.002               | 0.369        | 0.736           |
| Eosinophils                         | 386 | 0.899      | 0.000               | 0.539        | 0.798           |
| APTT                                | 255 | 0.146      | 0.309               | 0.248        | 0.656           |
| PT                                  | 260 | 0.322      | 0.697               | 0.469        | 0.798           |
| INR                                 | 163 | 0.002      | 0.741               | 0.907        | 0.934           |
| Fibrinogen                          | 137 | 0.711      | 0.090               | 0.916        | 0.934           |
| D-dimer                             | 147 | 0.027      | 0.504               | 0.282        | 0.656           |
| CRP                                 | 457 | 0.000      | 0.039               | 0.326        | 0.676           |

## Supplementary Figure Legends

**Figure S1.** (A) Age, ethnicities, and pre-admission co-morbidities of COVID-19 patients undergoing invasive mechanical ventilation [Cardiovascular Disease (CVD); Hypertension (HT), Chronic Kidney Disease (CKD), Venous thromboembolism (VTE), Chronic Obstructive Pulmonary Disease (COPD), Immunosuppression (IS). (B) Outcome to ICU admission. Grey vertical lines labelled 25%, 50%, 75% indicate the time points (8, 14 and 23 days, respectively) by which the stated proportion of patients that were either discharged or deceased. (C) Admission dates to intensive care unit (ICU) across first pandemic surge; Grey vertical lines represent quartiles based on number of patients admitted.

**Figure S2.** Time-series analyses of ICU outcome. (A) Each panel presents the time-series of a physiological measure of patients who were discharged (green) versus died (red) over the first 3 weeks of IMV (\* $P < 0.05$  interaction with mixed model ANOVA over the first week of IMV, see table S14). The Solid lines are the group medians, and the shaded areas are the semi-interquartile range. The number of subjects decay over time as patients die and discharge and the initial and final numbers available for each measure are presented on the graph. (B) Correlation matrix between all variables considered for the logistic regression (the final set of parameters was based on less than 40% missingness, see table S2). (C) The odds ratio and their 95% confidence interval for Univariate and Multivariate logistic regression models where a higher odds ratio is the increased likelihood of dying for each step increase in the admission variable and physiological measures. Continuous variables were discretely sized by a split into quartiles (see supplementary methods for details and table S14 for the full stats). All variables (of the list in table S2) with less than 40% missingness were included in the model. Subjects with more than 20% missing data were removed from the analysis.

**Figure S3.** (A) Legend listing all clinical features available in SHAP plots. The clinical features were arranged from most important to least important. The colour shade of each clinical measurement represents the clinical grouping. The clinical grouping/colour pair are grey for CVS physiology, purple for Renal / Liver, green for Pulmonary physiology, blue for Haematology / Coagulation, and red for Inflammation / Infection. (B) Concept figure depicting four different clinical parameters groupings based on their varying importance characteristic in predicting mortality outcome. The colour and shape of each polygon represent groupings of each clinical parameter importance in predicting mortality which is 1. increasing (yellow), 2. decreasing (blue), 3. constant high (green), and 4. constant low importance (red). (C)(D) Two-days rolling average of mean absolute SHAP values of various importance characteristic changes day-by-day. Each panel represents groupings of each clinical parameter

importance as described in (B). (C) mean absolute SHAP plots of our logistic regression model. (D) mean absolute SHAP plots of our three-layer multilayer perceptron model.

**Figure S4.** (A) Time-series analyses of first week resolution. Each panel presents the time-series of a physiological measure of resolvers (light blue) versus non-resolvers (yellow) over the first 3 weeks of IMV (\*P<0.05 interaction with mixed model ANOVA over the first week of IMV, see table S7). The Solid lines are the group medians, and the shaded areas are the semi-interquartile range. The number of subjects decay over time as patients die and discharge and the initial and final numbers available for each measure are presented on the graph. (B) ICU survival curves for patients who were showing improvement in hypoxaemia category over the first week on IMV (resolvers, light blue) versus deterioration in hypoxaemia category (non-resolvers, yellow). (C) Correlation matrix between all variables considered for the logistic regression (the final set of parameters was based on less than 40% missingness, see table S2). (D) The odds ratio and their 95% confidence interval for Multivariate logistic regression models where a higher odds ratio is the increased likelihood for progression of hypoxaemia for each step increase in the admission variable and physiological measures. Continuous variables were discretely sized by a split into quartiles (see supplementary methods for details and table S8 for the full stats). All variables (of the list in table S2) with less than 40% missingness were included in the model. Subjects with more than 20% missing data were removed from the analysis.

**Figure S5.** (A) Outcome of adjunctive interventions application (bold colours) versus no application (lighter colours): from the bottom we stack discharged and intervened (solid green), deceased and intervened (solid red), discharged and not-intervention (light green), deceased and non-intervention (light red). Percentages are out of the total number of patients (N=633). Most patients will have had multiple interventions, so the bar chart does double count. (B) Percentages of patients being in a low or high hypoxaemia severity ( $\text{PaO}_2/\text{FiO}_2$  ratio > or < 20kPa) at the last time point before the intervention (i.e. either morning of the day of the intervention or the evening before). (C) Visualisation of the variability of when and how long interventions were applied for and their associated patient outcome (green - discharge, red - deceased) showing data in a separate boxed panel for each intervention. Each boxed panel contains a scatter plot of the number of days of invasive mechanical ventilation (IMV) at which first intervention was applied (x-Axis) vs duration of the first period of that intervention in days (y-Axis). Parallel to the respective axis we show the marginal histogram of the data points in the scatter plot (e.g. the histogram for start of first intervention on the x-Axis). In the bottom left of the boxed panel we show the histogram of the number of repeated intervention periods a patient underwent (see main text for details). NMBA was commenced on admission (1[0-3] days) and lasted 4(1-7) days. Prone

position was applied on day 2(1-5) and lasted 2(1-4) days. Inhaled nitric oxide and prostacyclin were commenced on day 6(3-9) and 7(3-15) and were continued for 4(2-7) days and 3(1-7) days, respectively. Tracheostomy was performed in 29% at a median 14(9-18) days in patients mainly likely to survive (40% versus 10.9%;  $P < 0.001$ ). Diuresis was utilised in 74% and applied on day 1(1-3) and lasted 3(1-5) days. Renal replacement therapy was utilised in 38% of patients with a median commencement on day 3(1-6) after IMV, and a median duration of 5(3-11) days. Anti-microbial prescribing was common in 70% of patients and were administered on or before day of admission, often lasting 6(4-9) days, however, these data was only available in less than 50% of the population as it was missing in some of the sites. From the sites where it was reported the missingness was less than 5%. See Table S5 for an overview of the interventions and their respective use statistics. Most patients will have had multiple interventions, see our online interface ([www.covidUK.icu](http://www.covidUK.icu)) to explore the interactions between interventions.

**Figure S6.** Variations in the reported application of interventions between sites. On the y axis are the percentages of patients who received each intervention in each site. On the bars are the number of the patients who received each intervention in each site over the total number of patients from that site.

**Figure S7.** Overview of weight effect on tidal volume and PEEP management. **(A)** The distributions of reported (light blue) and calculated ideal (light red) body weights highlighting systematic differences. **(B)** The distributions tidal volumes in ml/Kg for reported and ideal body weights. **(C)** The management of PEEP as a function of  $FiO_2$  plotted in a scatter plot for non-morbidly obese patients ( $BMI < 40$ , left) and morbidly obese ( $BMI \geq 40$ , right). Each plot shows the pre-COVID recommended PEEP ladder of ARDSNet (solid black line) against actual data points showing clearly visible departure from recommended pre-COVID PEEP ladder. Data points are colour coded by Days after initiation of IMV (see colour bar in the next sub-figure). **(D)** Visualisation of the changes in PEEP against the change in  $PaO_2/FiO_2$  ratio. The changes are measured across two adjacent time points with the PEEP change being introduced at some point between the two time points. Data points are colour coded by days after initiation of IMV (see colour bar).

**Figure S8.** Responsiveness to prone position with responders defined as maintenance of a mean  $PaO_2/FiO_2 > 20kPa$  over 7 days after the first prone episode. **(A)** Each panel presents the time-series of a physiological measure of prone responders (blue) versus non-responders (red) from a day before the first prone manoeuvre to 7 days after ( $*P < 0.05$  interaction with mixed model ANOVA over this period, see table S10). The Solid lines are the group medians and the shaded areas are the semi-interquartile range. The number of subjects decay over time as patients die and discharge and the initial and final



numbers available for each measure are presented on the graph. **(B)** Changes in PaO<sub>2</sub>/FiO<sub>2</sub> ratio over 36 hours around the first prone manoeuvre (from the last measurement before until the first measurement the day after) as a function of the duration of IMV prior to the manoeuvre. The dots are colour coded by ARDS severity prior to the manoeuvre. The red line presents an exponential fit, and the reported *r* is the Spearman rank correlation. **(C and E)** Correlation matrix between all pre-pronation **(C)** and post-pronation **(E)** variables considered for the logistic regression (the final set of parameters was based on less than 40% missingness, see table S2). **(D and F)** The odds ratio and their 95% confidence interval for Univariate and Multivariate logistic regression models where a higher odds ratio is the increased likelihood of not responding to prone position for each step increase in the admission variable and in the **(D)** pre-pronation (the last record within 24 hours prior intervention) or **(F)** post-pronation (the first record in the day after intervention) physiological measures. Continuous variables were discretely sized by a split into quartiles (see supplementary methods for details and table S11 and S12 for the full stats for pre- and post-prone respectively). All variables (of the list in table S2) with less than 40% missingness were included in the model. Subjects with more than 20% missing data were removed from the analysis.

**Figure S9.** Oxygenation Index (OI) dependency on P/F ratio. Scatter plot of admission measurements of Oxygenation Index vs PaO<sub>2</sub>/FiO<sub>2</sub> (in red) shows a strong exponential link. Twice daily measurements of Oxygenation Index vs PaO<sub>2</sub>/FiO<sub>2</sub> of all patients during the entire ICU stay (black) shows the same strong exponential link.

**Figure S10.** Comparison between PPCA-reconstructed and original clinical data. Scatter plots of all the weeklong clinical measurement with normal or log-normal distributions vs PPCA-reconstructed of the same features show a strong 1-to-1 linear relationship. These imply high reconstruction accuracy.

Figure S1 – Demographics, admission dates during surge, and outcomes of cohort

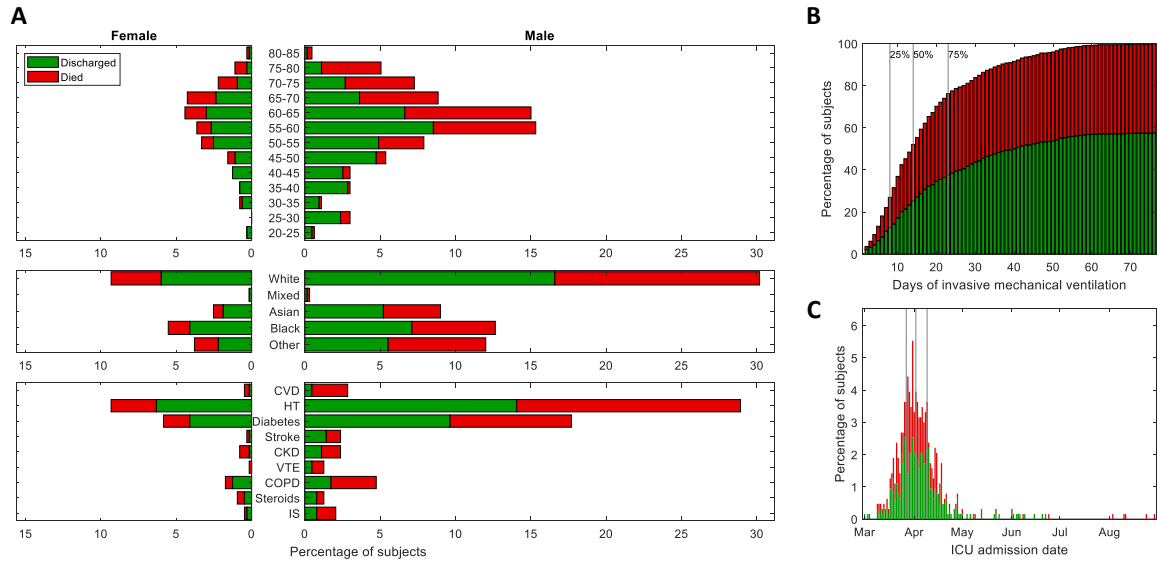

Figure S2 – Comparisons between ICU survivors and non-survivors.

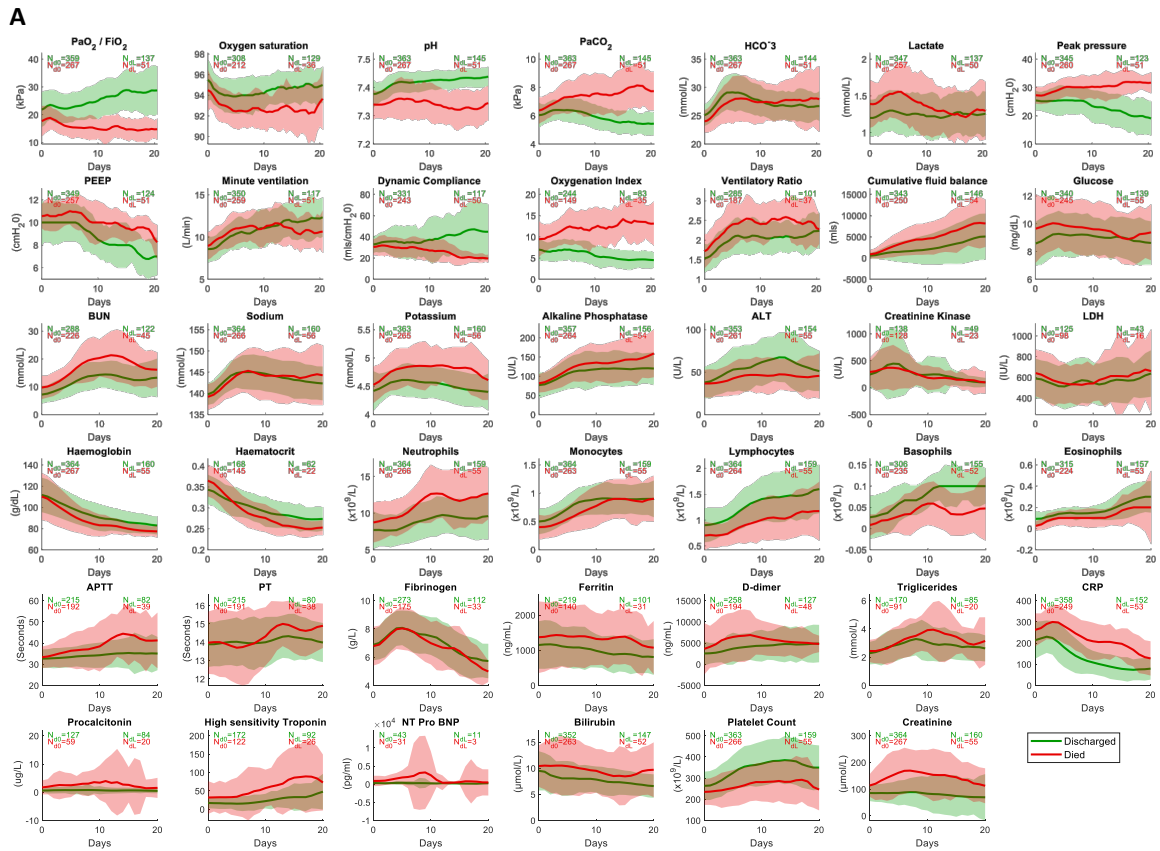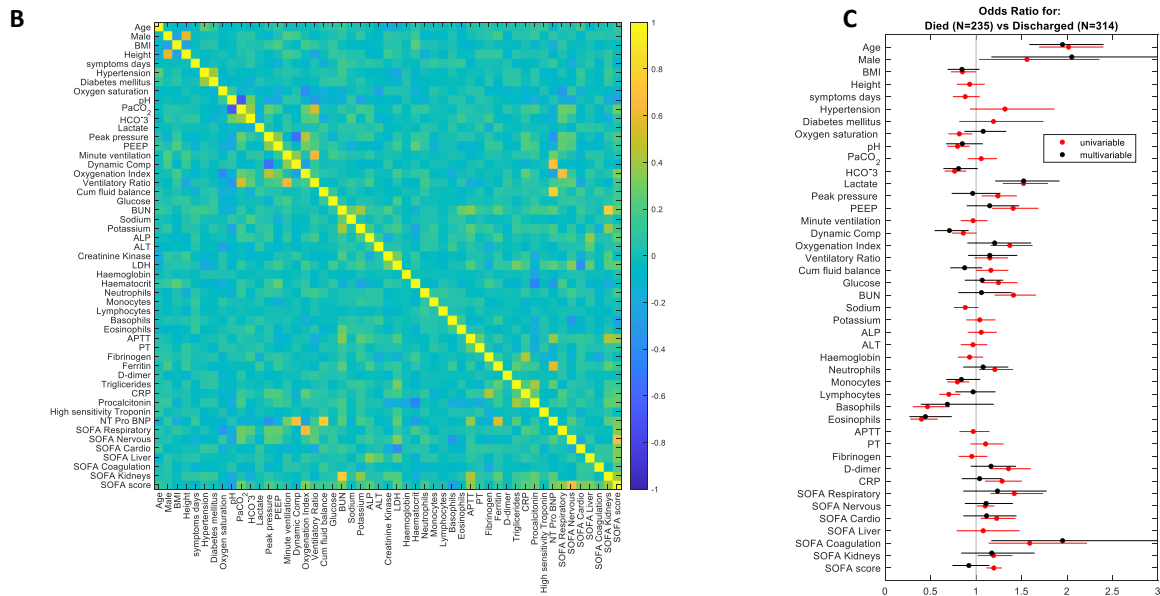

Figure S3 – Machine Learning and Explainability Artificial Intelligence analysis of predictors of ICU mortality

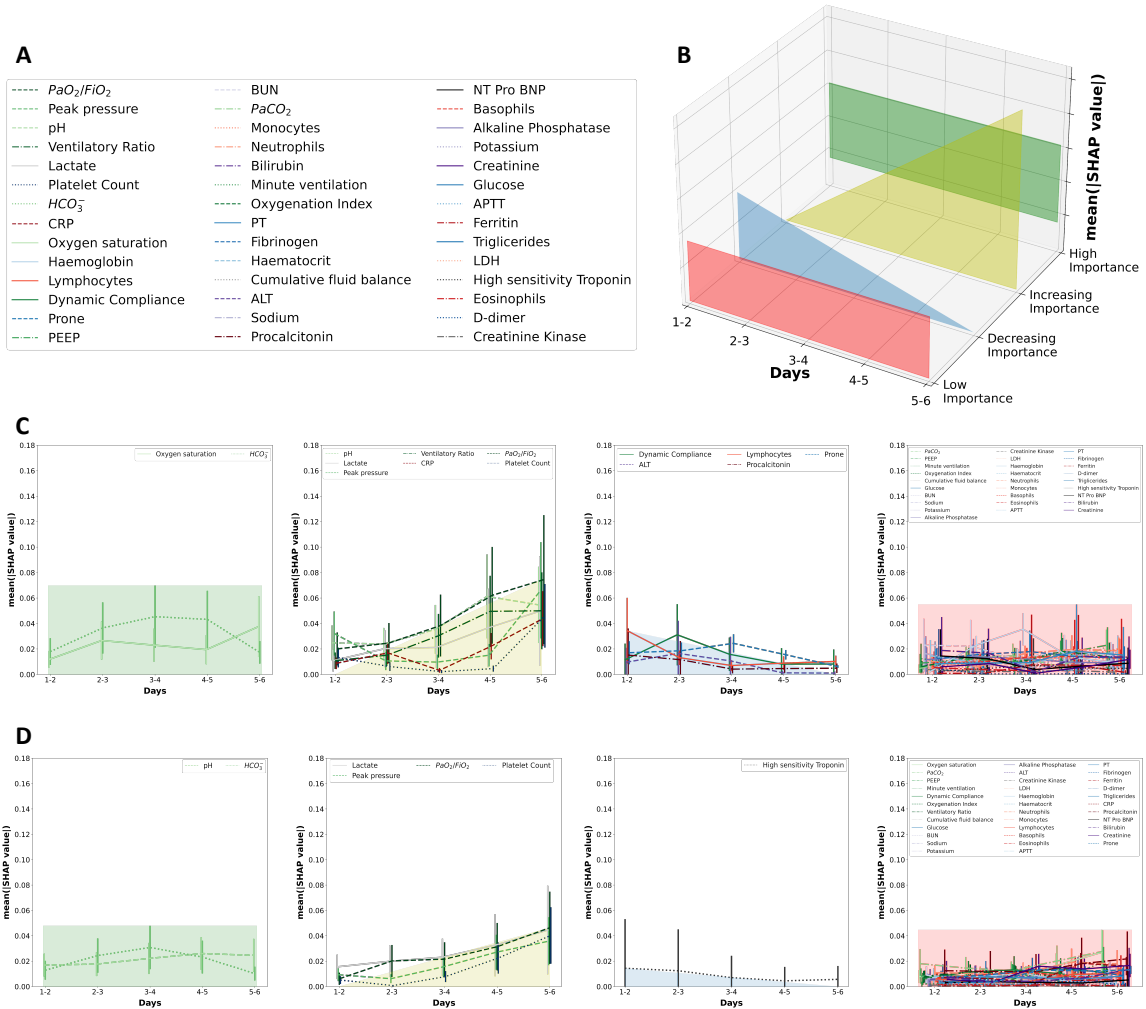

Figure S4 – Comparisons between hypoxaemia resolvers and non-resolvers.

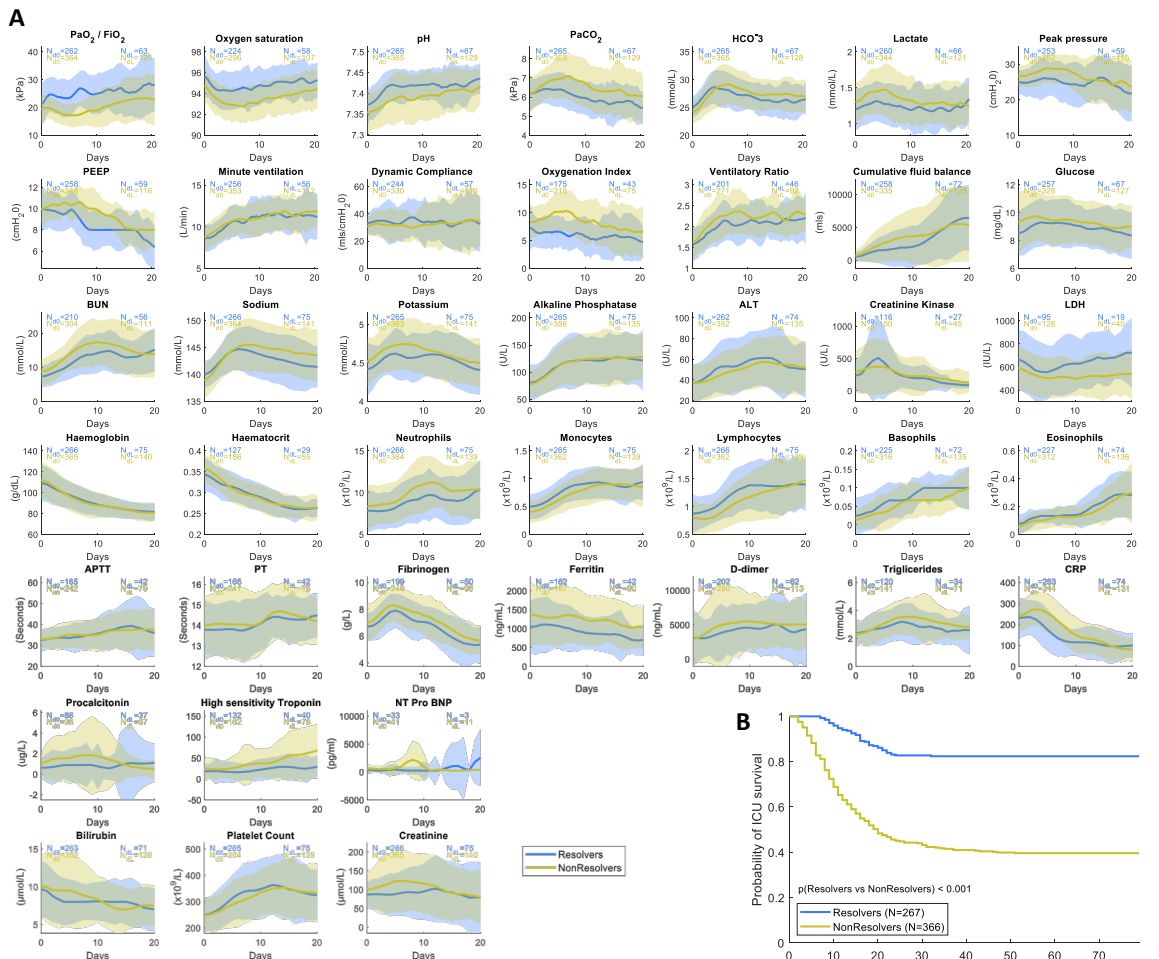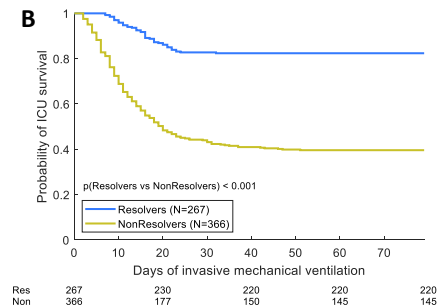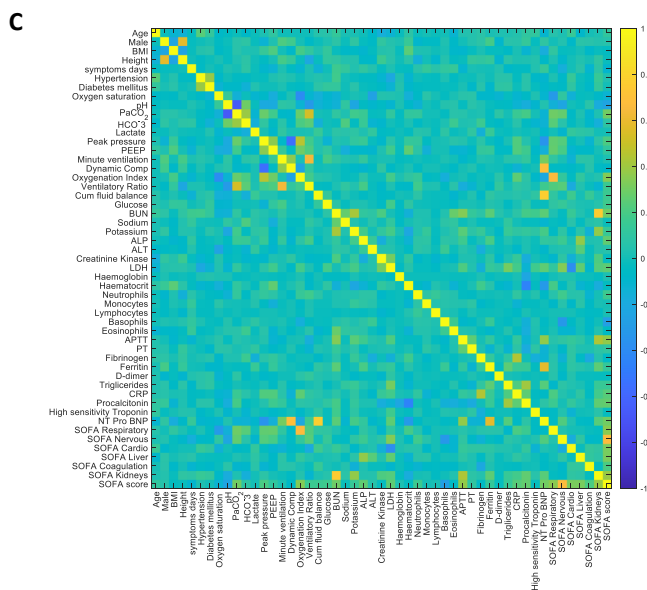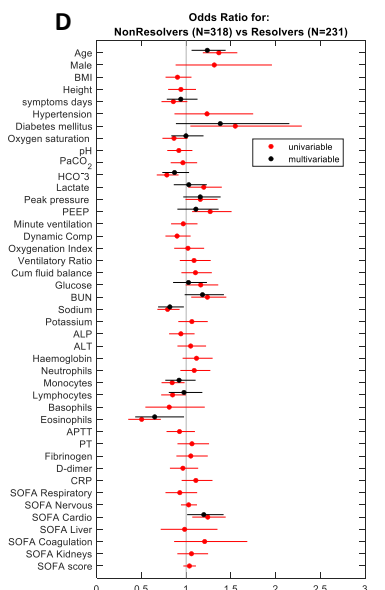

Figure S5 – Application of ICU and ARDS specific interventions

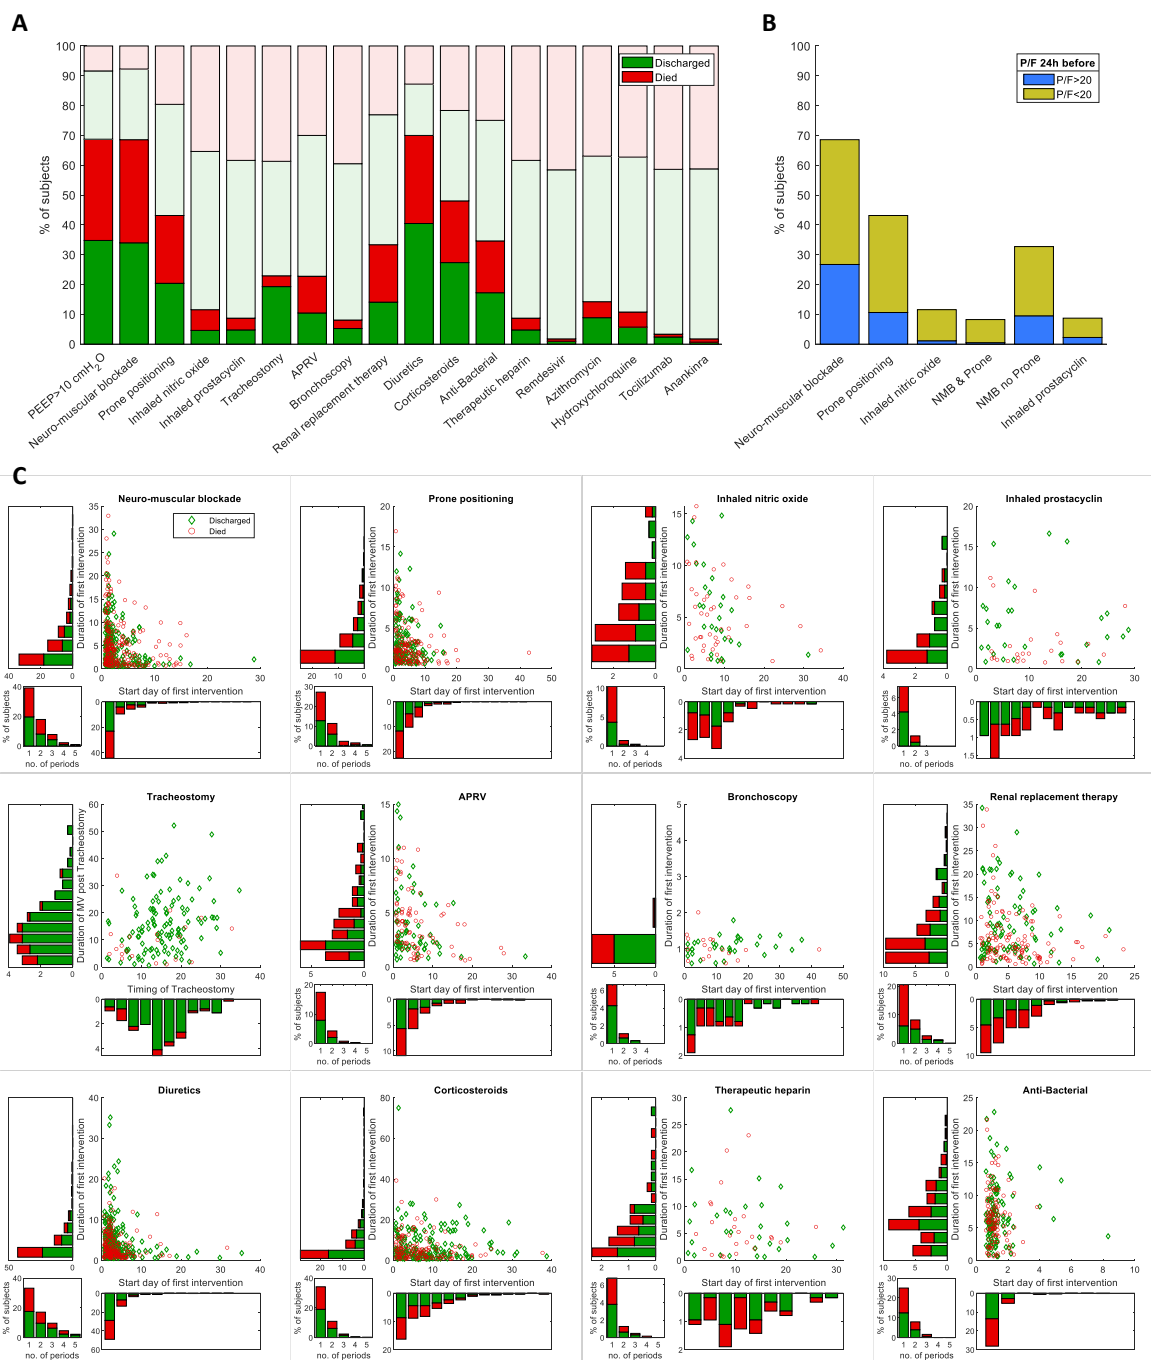

Figure S6 – Site Variations in ICU and ARDS specific interventions

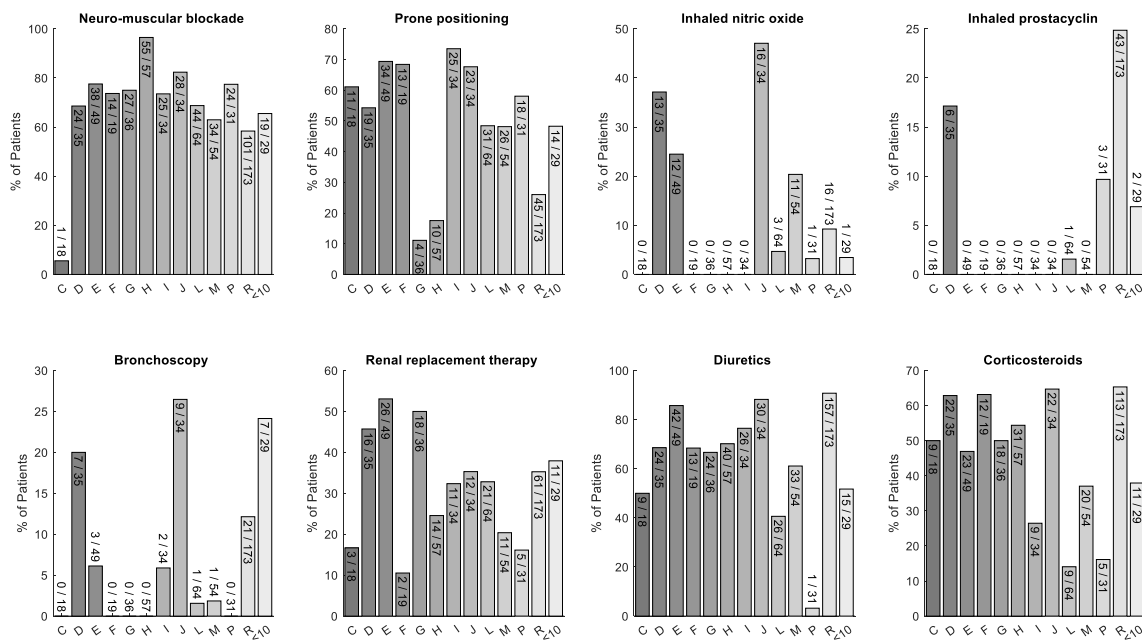

Figure S7 – Lung protective tidal volume and open lung strategies

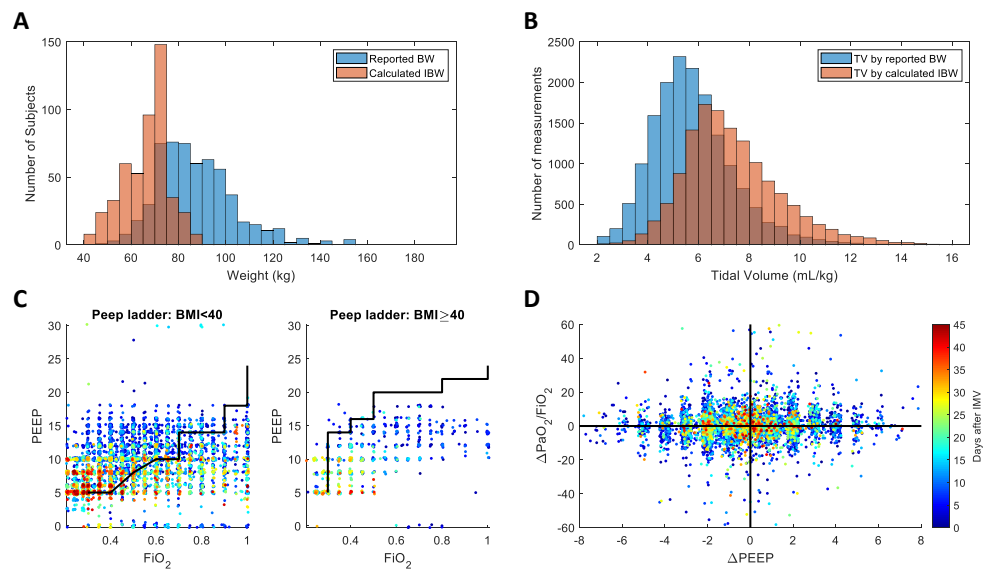



Figure S8 – Comparisons between hypoxaemia resolvers and non-resolvers.

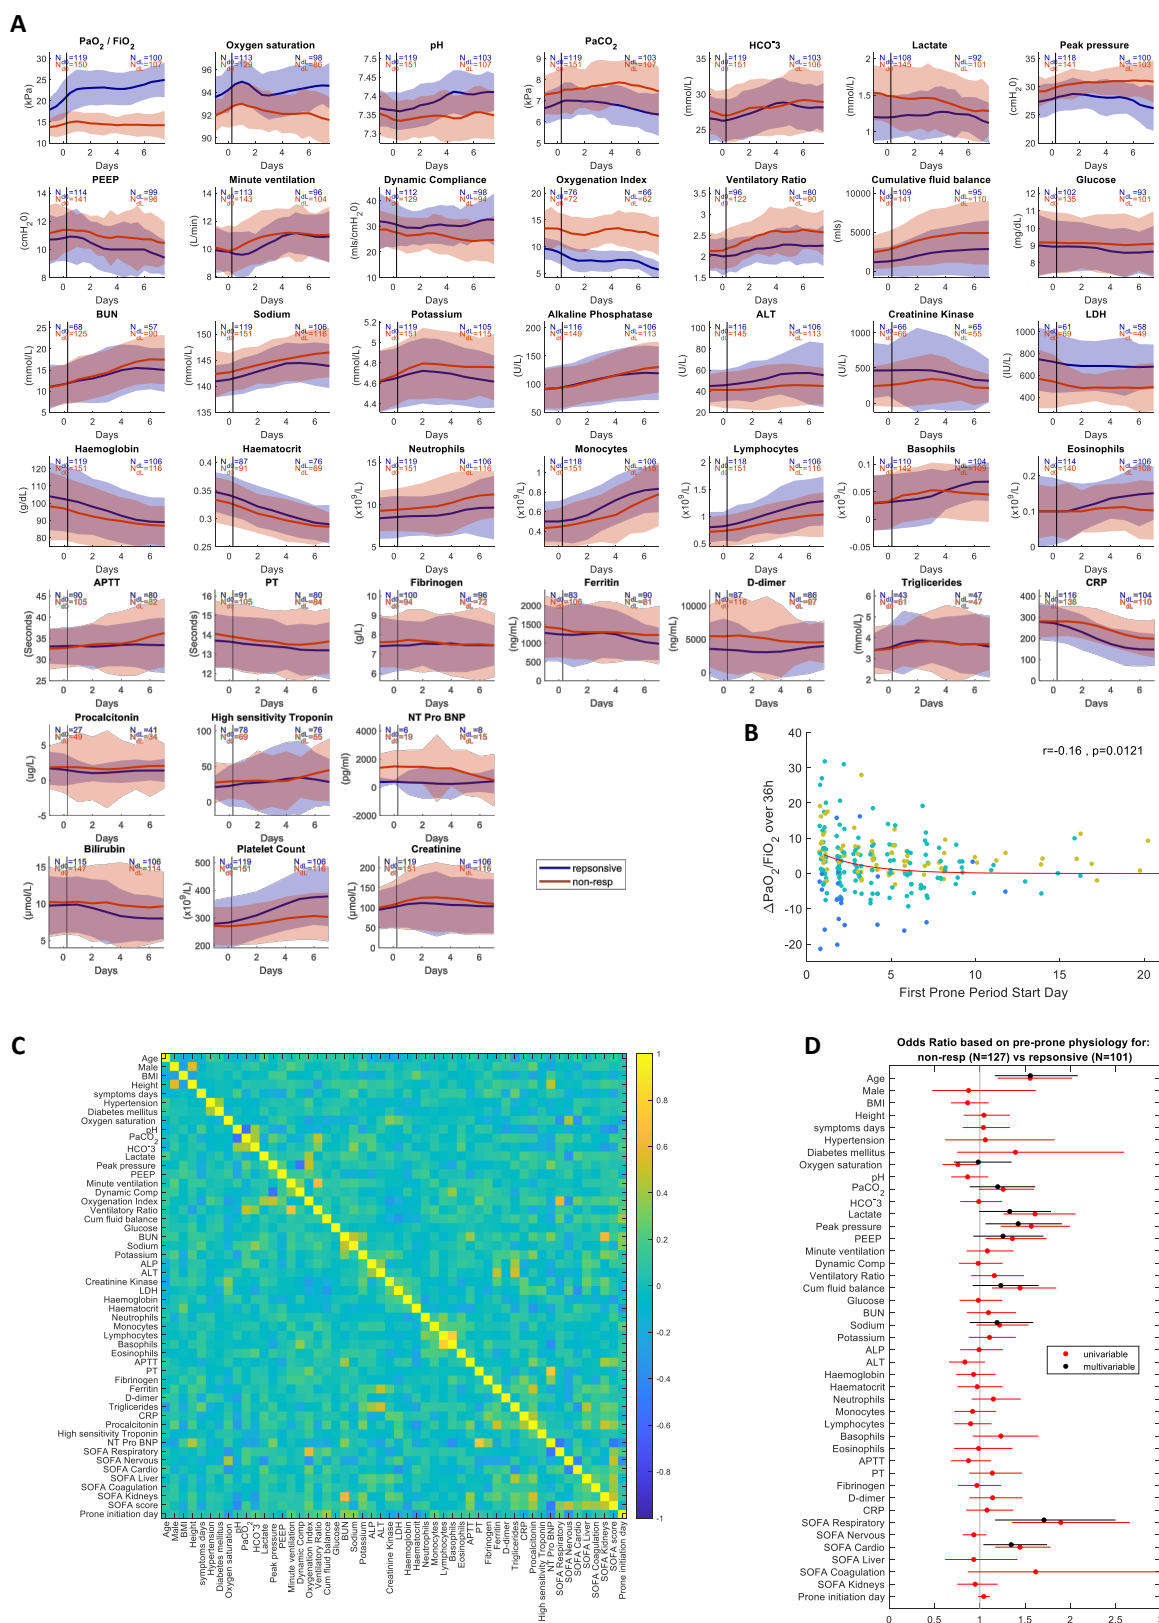

Figure S8 continued – Comparisons between hypoxaemia resolvers and non-resolvers

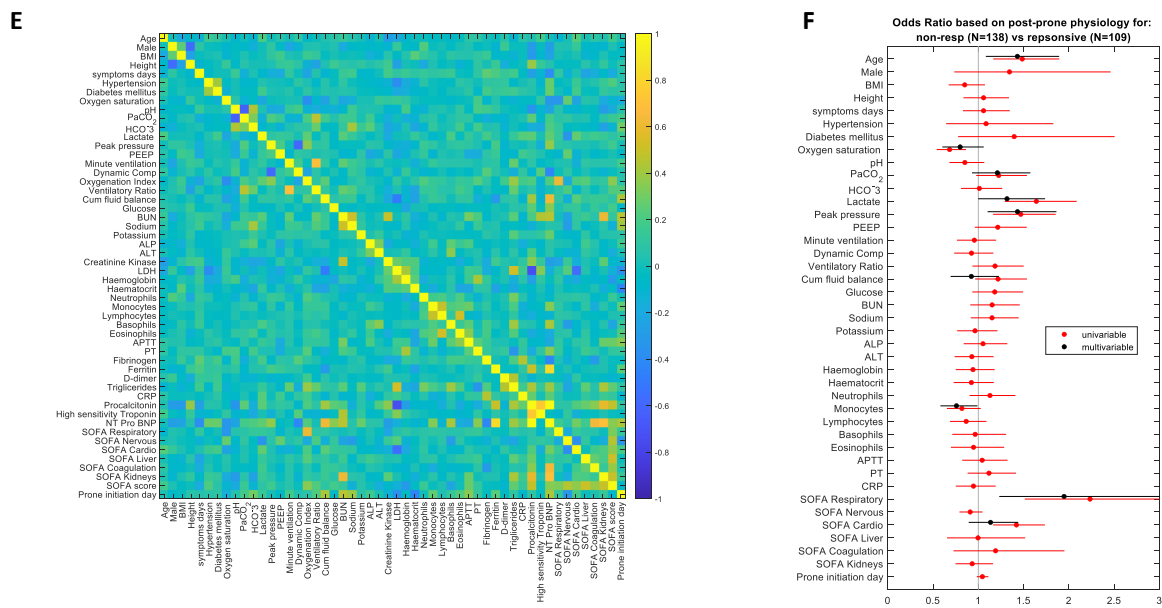

Figure S9 – Oxygenation Index dependency on PaO<sub>2</sub>/FiO<sub>2</sub> ratio

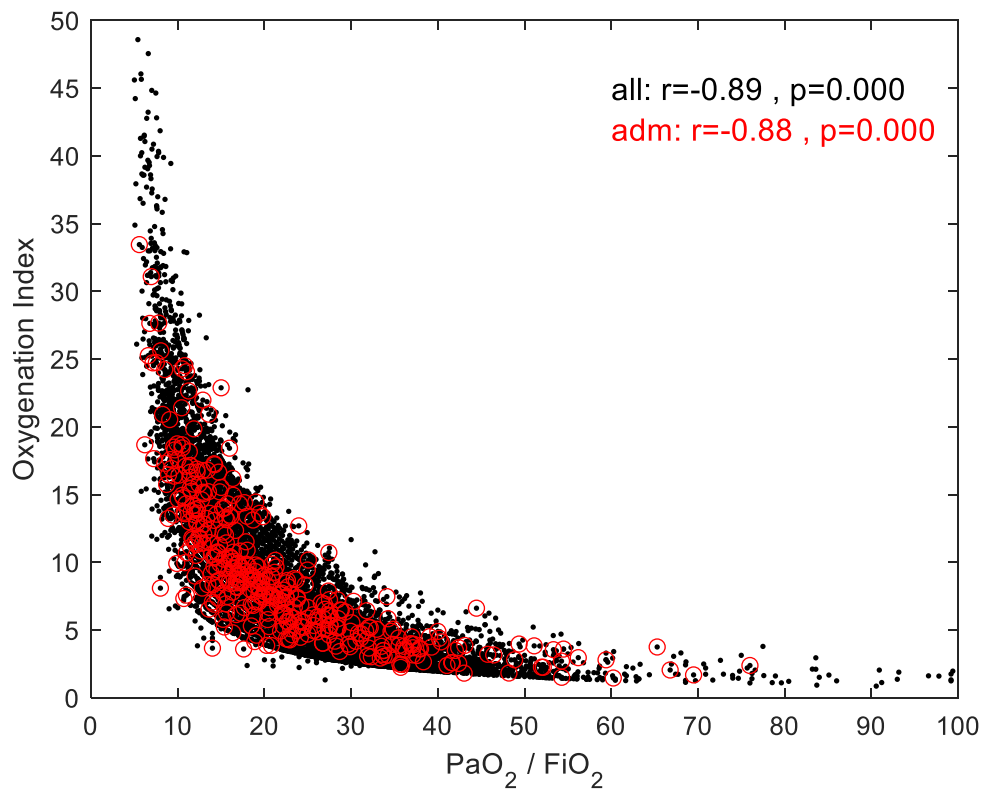

Figure S10 – Comparison between PPCA-reconstructed and original clinical data.

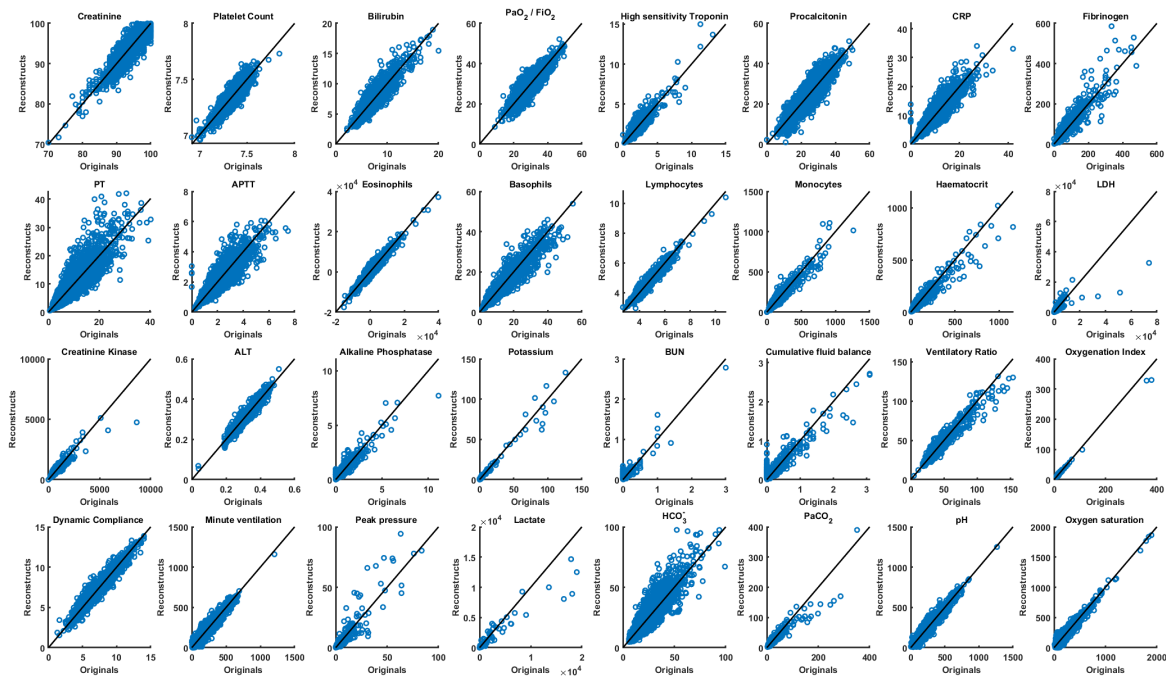

Supplement: 134_2021_6389_MOESM1_ESM.pdf [file 134_2021_6389_MOESM1_ESM.pdf]
